# Supplementary material
Source: MDPI journal article supplement (https://www.mdpi.com/2079-8954/11/7/351)
Supplement: s1 [file s1 › Supplementary Tables.xlsx]

## Sheet: Table S1
	Table S1: Unique keywords as extracted from ChatGPT and VosViewer
	unique Keywords from VosViewer	50/50	0.2
			['internet of things', 'iot', 'network security', 'information management', 'artificial intelligence', 'internet of thing (iot)', 'smart cities', 'automation', 'sensors', 'water distribution systems', 'data acquisition', 'embedded systems', 'water levels', 'electric power transmission networks', 'digital storage', 'internet', 'critical infrastructures', 'data handling', 'decision making', 'climat…
	unique Keywords from ChatGPT		0.2
			['internet of things (iot)', 'water', 'sensor', 'wastewater', 'infrastructure', 'wireless sensor network', 'sanitation', 'iot applications', 'remote monitoring', 'data analytics', 'urban water management', 'sustainability', 'sewage', 'real-time monitoring', 'environmental monitoring', 'smart water', 'iot-enabled', 'water treatment', 'iot sensors', 'smart infrastructure', 'water distribution', 'wa…
	unique Keywords from VosViewer	100/100	0.28
			['iot', 'smart city', 'information management', 'monitoring', 'internet of thing (iot)', 'automation', 'sensors', 'data acquisition', 'embedded systems', 'water levels', 'electric power transmission networks', 'digital storage', 'internet', 'critical infrastructures', 'data handling', 'climate change', 'floods', 'costs', 'intelligent buildings', 'advanced metering infrastructures', 'energy utiliz…
	unique Keywords from ChatGPT		0.28
			['water', 'wastewater', 'smart water management', 'infrastructure', 'real-time monitoring', 'sewage', 'asset management', 'cyber-physical systems', 'process optimization', 'leakage detection', 'scada', 'remote sensing', 'iot-enabled water and wastewater systems', 'predictive maintenance', 'sanitation', 'edge computing', 'condition-based monitoring', 'flood management', 'water demand', 'sewage inf…
	unique Keywords from VosViewer	180/180	0.227778
			['internet of things', 'iot', 'smart city', 'network security', 'information management', 'internet of thing (iot)', 'automation', 'data acquisition', 'embedded systems', 'water levels', 'electric power transmission networks', 'digital storage', 'internet', 'critical infrastructures', 'data handling', 'climate change', 'costs', 'advanced metering infrastructures', 'energy utilization', 'public wo…
	unique Keywords from ChatGPT		0.227778
			['internet of things (iot)', 'data analysis', 'smart water networks', 'sanitation', 'internet of everything (ioe)', 'smart grids', 'machine-to-machine (m2m)', 'modeling', 'information and communication technologies (ict)', 'internet of medical things (iomt)', 'optimization', 'smart sensors', 'water scarcity', 'environmental sustainability', 'real-time data', 'internet of energy (ioe)', 'water dem…
	unique Keywords from VosViewer	200/200	0.212121
			['internet of things', 'iot', 'network security', 'information management', 'monitoring', 'internet of thing (iot)', 'automation', 'sensors', 'water distribution systems', 'data acquisition', 'embedded systems', 'water levels', 'electric power transmission networks', 'digital storage', 'internet', 'critical infrastructures', 'data handling', 'climate change', 'floods', 'costs', 'intelligent build…
	unique Keywords from ChatGPT		0.212121
			['internet of things (iot)', 'wastewater', 'infrastructure', 'smart water systems', 'machine-to-machine (m2m)', 'cyber-physical systems (cps)', 'water resource management', 'asset management', 'predictive maintenance', 'smart grids', 'optimization', 'urban water management', 'renewable energy', 'fault detection', 'distributed systems', 'energy management', 'smart monitoring', 'smart environment',…
	In depth comparison	50 chatgpt/263 vosviewr	0.68
			{'energy management', 'water security', 'condition monitoring', 'information technology', 'smart water', 'infrastructure', 'water network', 'iot-enabled', 'leakage detection', 'fault detection', 'urban water management', 'sanitation', 'iot devices', 'asset management', 'iot sensors', 'digital twin'

## Sheet: Table S2
Table S2: Comparison between ChatGPT and human experts in classification process for Selected 120 articles.
ChatGPT							ChatGPT + Abstract							Human Experts						Comparsion
Paper	IoT-based water quality monitoring	IoT-based wastewater infrastructure management	IoT-based water infrastructure management	Not Related			Paper	IoT-based water quality monitoring	IoT-based wastewater infrastructure management	IoT-based water infrastructure management	Not Related			Paper	IoT-based water quality monitoring	IoT-based wastewater infrastructure management	IoT-based water infrastructure management	Not Related		( ChatGPT ) Vs (ChatGPT + Abstract)	( ChatGPT ) Vs Human Experts	(ChatGPT + Abstract) Vs Human Experts		Paper
1	X				.		1	X				.		1	x				.	1	1	1		Low-cost automated GPS, electrical conductivity and temperature sensing device (EC + T Track) and Android platform for water quality monitoring campaigns	.
2	X				.		2	X				.		2	x				.	1	1	1		Quality Assessment and Monitoring of River Water Using IoT Infrastructure	.
3	X				.		3	X				.		3	x				.	1	1	1		Simultaneous Detection of Multiple Surface Acoustic Wave Sensor Tags for Water Quality Monitoring Utilizing Cellular Code-Reuse Approach	.
4		X			.		4	X	X			.		4		x			.	1	1	1		Estimating Phosphorus and COD Concentrations Using a Hybrid Soft Sensor: A Case Study in a Norwegian Municipal Wastewater Treatment Plant	.
5	X				.		5	X				.		5	x				.	1	1	1		Wireless Airborne IoT Network for Rural Water Quality Monitoring	.
6	X				.		6	X				.		6	x				.	1	1	1		A Scalable, Low-Maintenance, Smart Water Quality Monitoring System	.
7				X	.		7				X	.		7				x	.	1	1	1		Securing smart home networks with software-defined perimeter	.
8				X	.		8				X	.		8				x	.	1	1	1		A review of LoRa technology and its potential use for rural development in Indonesia	.
9				X	.		9				X	.		9				x	.	1	1	1		Security Framework for IoT Cloud Services	.
10				X	.		10				X	.		10				x	.	1	1	1		New tree monitoring systems: From industry 4.0 to nature 4.0	.
11				X	.		11				X	.		11				x	.	1	1	1		A decision support system for scour management of road and railway bridges based on Bayesian networks	.
12				X	.		12				X	.		12				x	.	1	1	1		IoFT-FIS: Internet of farm things based prediction for crop pest infestation using optimized fuzzy inference system	.
13			X		.		13	X				.		13					.	1	1	1		Designing smart pulse flow meters using diversion analysis	.
14			X		.		14			X		.		14					.	1	1	1		IoT Based Remote Monitoring, Control, and Protection of Irrigation Water Pumping System	.
15			X		.		15	X	X	X		.		15			x		.	1	1	1		Development of a distributed MR-IoT method for operations and maintenance of underground pipeline network	.
16	X				.		16	X				.		16	x		x		.	1	1	1		An Intelligent Modular Water Monitoring IoT System for Real-Time Quantitative and Qualitative Measurements	.
17				X	.		17				X	.		17				x	.	1	1	1		WaterPurifier: A scalable system to prevent the DNS water torture attack in 5G-enabled SIoT network	.
18			X		.		18			X		.		18					.	1	1	1		Semi-supervised machine learning analysis of crop color for autonomous irrigation	.
19				X	.		19				X	.		19				x	.	1	1	1		Monitoring of rainfall-induced landslides at Songmao and Lushan, Taiwan, using IoT and big data-based monitoring system	.
20				X	.		20	X		X		.		20				x	.	0	1	0		Digital Water Services using Digital Twin paradigm	.
21	X	X			.		21	X	X			.		21					.	1	1	1		Design and Implementation: An IoT-Framework-Based Automated Wastewater Irrigation System	.
22			X		.		22				X	.		22	x		x		.	0	1	0		Complexities of the urban drinking water systems in Ethiopia and possible interventions for sustainability	.
23				X	.		23	X	X	X		.		23				x	.	0	1	0		Role of IoT in Smart City: A Review	.
24				X	.		24				X	.		24				x	.	1	1	1		An automated standalone hand wash outdoor deployment unit for infectious disease control	.
25			X		.		25	X		X		.		25			x		.	1	1	1		Smart Water Metering Implementation	.
26				X	.		26				X	.		26				x	.	1	1	1		Secure Swarm UAV-Assisted Communications With Cooperative Friendly Jamming	.
27	X		X		.		27				X	.		27				x	.	0	0	1		Smart water campus - a testbed for smart water applications	.
28			X		.		28	X		X		.		28			x		.	1	1	1		Optimising the energy-water-CO2 nexus of a water distribution network	.
29			X		.		29				X	.		29			x		.	0	1	0		High-Resolution Tap-Based IoT System for Flow Data Collection and Water End-Use Analysis	.
30				X	.		30				X	.		30				x	.	1	1	1		Remote poultry management system for small to medium scale producers using IoT	.
31	X				.		31	X		X		.		31					.	1	1	1		NB-IoT Coverage and Sensor Node Connectivity in Dense Urban Environments: An Empirical Study	.
32	X				.		32				X	.		32				x	.	0	0	1		The city management based on smart information system using digital technologies in China	.
33				X	.		33				X	.		33				x	.	1	1	1		Old MacDonald had a smart farm: Building a testbed to study cybersecurity in smart dairy farming	.
34				X	.		34				X	.		34				x	.	1	1	1		IoT-Enabled Smart Healthcare Infrastructure Maximises Energy Efficiency	.
35			X		.		35	X				.		35				x	.	1	0	0		Machine Learning-Based Prediction of Node Localization Accuracy in IIoT-Based MI-UWSNs and Design of a TD Coil for Omnidirectional Communication	.
36				X	.		36				X	.		36				x	.	1	1	1		MAGLOC: A magnetic induction based localization scheme for fresh food logistics	.
37				X	.		37				X	.		37			x	x	.	1	1	1		Flexible triboelectric nanogenerator toward ultrahigh-frequency vibration sensing	.
38	X				.		38	X				.		38	x				.	1	1	1		Online monitoring and sampling analysis of siltation in the middle route of the south-to-north water diversion project	.
39				X	.		39				X	.		39				x	.	1	1	1		Lessons learned from an IoT deployment for condition monitoring at the Port of Felixstowe	.
40				X	.		40				X	.		40				x	.	1	1	1		A Self-Tuning Cyber-Attacks' Location Identification Approach for Critical Infrastructures	.
41	X				.		41	X	X	X		.		41				x	.	1	0	0		Generalised network architectures for environmental sensing: Case studies for a digitally enabled environment	.
42				X	.		42				X	.		42				x	.	1	1	1		Learning Graph Structures With Transformer for Multivariate Time-Series Anomaly Detection in IoT	.
43	X				.		43				X	.		43				x	.	0	0	1		IOT based environment harmful gases detecting and controlling system	.
44					.		44				X	.		44				x	.	0	0	1		Joining Sustainable Design and Internet of Things Technologies on Campus: The IPVC Smartbottle Practical Case	.
45				X	.		45				X	.		45				x	.	1	1	1		Graph Layer Security: Encrypting Information via Common Networked Physics	.
46			X		.		46	X		X		.		46			x		.	1	1	1		Development of an Intelligent Urban Water Network System	.
47					.		47	X				.		47			x		.	1	1	1		ASHRAY: Enhancing Water-usage Comfort in Developing Regions using Data-driven IoT Retrofits	.
48	X		X		.		48	X				.		48					.	1	1	1		Subsurface drip irrigation and ICT for the innovative irrigation water management: application to a citrus crop (C. reticulata 'Tardivo di Ciaculli')	.
49				X	.		49				X	.		49				x	.	1	1	1		Federated Learning for Intrusion Detection in the Critical Infrastructures: Vertically Partitioned Data Use Case	.
50	X		X		.		50				X	.		50				x	.	0	0	1		ADO: An open digital end-to-end tank based aquaculture platform	.
51	X			X	.		51				X	.		51				x	.	1	1	1		Recent development of nano-satellite constellation as iot communication platform	.
52	X			X	.		52				X	.		52				x	.	1	1	1		Trusted Data Storage Architecture for National Infrastructure	.
53				X	.		53	X				.		53					.	0	0	1		AgriWealth: IoT based farming system	.
54				X	.		54	X				.		54					.	0	0	1		Evaporation Forecasting through Interpretable Data Analysis Techniques	.
55	X				.		55	X				.		55	x				.	1	1	1		A hand-held optoelectronic tongue for the identification of heavy-metal ions	.
56					.		56				X	.		56				x	.	0	0	1		High-Performance Conformal Thermoelectric Generator for Environmental Monitoring	.
57				X	.		57	X	X	X		.		57				x	.	0	1	0		Village 5.0: Enabling Technologies and its Applications in Development of Smart Village	.
58	X				.		58	X				.		58	x				.	1	1	1		A Novel Low-Cost Approach for Detection, Classification, and Quantification of Microplastic Pollution in Freshwater Ecosystems using IoT devices and Instance Segmentation	.
59			X	X	.		59				X	.		59				x	.	1	1	1		Intrusive Energy Management with advanced smart metering and monitoring using IoT	.
60				X	.		60				X	.		60				x	.	1	1	1		Cybersecurity Threats and Solutions of IoT Network Layer	.
61	X				.		61	X		X		.		61			x		.	1	1	1		Smart-Water: Digital Transformation of Urban Water Measurement	.
62		X			.		62			X		.		62			x		.	1	1	1		Maintenance 4.0 for Water Pumping Infrastructures	.
63			X		.		63	X				.		63	x				.	1	1	1		A Network Infrastructure for Monitoring Coastal Environments and Study Climate Changes in Marine Systems	.
64	X				.		64				X	.		64				x	.	0	0	1		Applications of the Internet of Things (IoT) in Real-Time Monitoring of Contaminants in the Air, Water, and Soil â€	.
65			X		.		65	X		X		.		65	x		x		.	1	1	1		A Federated Learning Approach for Water Distribution Networks Monitoring	.
66					.		66				X	.		66				x	.	0	0	1		IoT Based Mobile Application for Monitoring of Hydroponic Vertical Farming	.
67			X		.		67				X	.		67				x	.	0	0	1		Design and Implementation of an IoT-Edge Computing-based Flood Monitoring System for Early Warning: A Case of Nagaon District in Assam	.
68				X	.		68				X	.		68				x	.	1	1	1		Case Study for the Deployment of Private LPWA (Low Power Wide Area) Network in ADNOC Onshore for Remote Monitoring and Operations	.
69					.		69				X	.		69				x	.	0	0	1		Real-Time and Near-Real-Time Services in Distributed Environment for IoT â€“ Edge â€“ Cloud Computing Implementation in Agriculture and Well-Being	.
70				X	.		70				X	.		70	x		x		.	1	0	0		Electronic sensors to monitor functionality and usage trends of rural water infrastructure in Plateau State, Nigeria	.
71	X				.		71	X				.		71			x		.	1	1	1		Sensor Cloudlet Interconnecting System for water Reservoirs Security	.
72				X	.		72				X	.		72				x	.	1	1	1		Firefighting Robot Based On IoT and Ban Levels Technique	.
73				X	.		73				X	.		73				x	.	1	1	1		Anomaly Detection for a Water Treatment System Based on One-Class Neural Network	.
74	X	X			.		74	X	X			.		74		x			.	1	1	1		An integrated approach for Wastewater Treatment System using IoT for green infrastructure using sensor	.
75			X		.		75	X	X	X		.		75	x		x		.	1	1	1		Edge Computing for Critical Infrastructure Delay Sensitive Applications: Current Trends and Future Directions	.
76	X				.		76	X				.		76	x				.	1	1	1		Assessment of Water Quality in Smart City Environment Leveraging ML-IoT	.
77				X	.		77	X				.		77	x				.	0	0	1		Smart IoT Biofloc Water Management System Using Decision Regression Tree	.
78			X		.		78	X				.		78	x				.	1	1	1		Smart City IoT System Network Level Routing Analysis and Blockchain Security Based Implementation	.
79			X		.		79	X		X		.		79	x		x		.	1	1	1		IoT-Enabled Water Distribution Systems - A Comparative Technological Review	.
80				X	.		80				X	.		80				x	.	1	1	1		Cyber-Security of Industrial Internet of Things in Electric Power Systems	.
81	X		X		.		81				X	.		81				x		0	0	1		Towards Digitalization of Water Supply Systems for Sustainable Smart City Development—Water 4.0	.
82			X		.		82			X		.		82			x			1	1	1		An IoT Enabled Water Management System with Water Usage Prediction using ANN	.
83			X		.		83			X		.		83			x			1	1	1		Smart water consumption measurement system for houses using IoT and cloud computing	.
84		X			.		84		X			.		84		x				1	1	1		A Real-Time Smart Wastewater Monitoring System Using IoT: Perspective of Bangladesh	.
85		X		X	.		85	X	X			.		85		x				0	0	1		Smart Drainage and Health Monitoring System of Manual Scavenger using IoT	.
86	X		X		.		86			X		.		86				x		1	0	0		Smart IoT based system for monitoring and controlling the sub-station equipment	.
87		X			.		87		X			.		87		x				1	1	1		Smart Drainage Monitoring and Controlling System Using IOT	.
88		X			.		88		X			.		88		x				1	1	1		Drainage Monitoring System Using IoT (DMS).	.
89	X		X		.		89			X		.		89			x			1	1	1		NB-IOT pipeline water leakage automatic monitoring system based on cloud platform	.
90		X			.		91			X		.		91			x			1	1	1		IoT platform for failure management in water transmission systems	.
91			X		.		93			X		.		93			x			1	1	1		A Pressure Monitoring System for Water Distribution Networks Based on Arduino Microcontroller	.
92	X				.		94	X				.		94	x					1	1	1		Real-time water quality monitoring system using Internet of Things	.
93		X			.		95		X			.		95		x				1	1	1		Internet of things for secure surveillance for sewage wastewater treatment systems	.
94		X			.		96		X			.		96		x				1	1	1		Intelligent wastewater treatment system with IOT based monitoring for smart cities	.
95			X		.		97			X		.		97			x			1	1	1		Artificial Intelligence and Internet of Things-Based Leak Detection Method for the Water Supply Network	.
96		X			.		99		X			.		99		x				1	1	1		Design and Implementation of an IoT Device for Measuring Discharges in Sanitation Networks	.
97		X			.		102		X			.		102		x				1	1	1		Underground drainage monitoring system using IoT	.
98		X			.		103		X			.		103		x				1	1	1		IoT device for sewage gas monitoring and alert system	.
99			X		.		104	X				.		104	x					1	1	1		IoT Watercare: Water Quality Control System in Unofficial Settlements of Peru Based in an IoT Architecture	.
100		X			.		105		X			.		105		x				1	1	1		A Cost-Effective IoT Model for a Smart Sewerage Management System Using Sensors	.
448	X				.		448	X	X			.		448		x				1	1	1		Converting dry ponds to wet ponds without excavation: Forecast-based real time outlet control offers a least-cost retrofit strategy	.
478		X			.		478		X			.		478		x				1	1	1		Performance Assessment of Sewer Networks under Different Blockage Situations Using Internet-of-Things-Based Technologies	.
479			X		.		479		X			.		479		x				1	1	1		Implementation of IoT-Based Sensor Systems for Smart Stormwater Management	.
485		X			.		485		X			.		485		x				1	1	1		IoT-based Automatic Manhole Observant for Sewage Worker's Safety	.
488			X		.		488		X			.		488		x				1	1	1		Process of RO's Waste Water Reuse & Water Management in Society by Using IOT Automation	.
489				X	.		489		X			.		489		x				0	0	1		Foundation Treatment in Urban Underground Engineering Using Big Data Analysis for Smart City Applications	.
492		X			.		492		X			.		492		x				1	1	1		Versatile and low-cost sensor interface for IoT-ready odor monitoring in wastewater management	.
493			X		.		493		X			.		493		x				1	1	1		Smart Infrastructure Monitoring using LoRaWAN Technology	.
496			X		.		496		X			.		496		x				1	1	1		Integrated urban water management with micro storages developed as an IoT-based solution – The smart rain barrel	.
498		X			.		498		X			.		498		x				1	1	1		LoRaWAN-based Smart Sewerage Monitoring System	.
348	X				.		348			X		.		348		x				1	1	1		Smart water distribution network solution for smart cities: Indian scenario	.
352		X			.		352			X		.		352			x			1	1	1		Underground infrastructure management system using internet of things wireless transmission technology	.
364				X	.		364			X		.		364			x			0	0	1		Linear WSN lifetime maximization for pipeline monitoring using hybrid K-means ACO clustering algorithm	.
369			X		.		369			X		.		369			x			1	1	1		Smart connected campus	.
370	X				.		370	X		X		.		370	x					1	1	1		The world-first deployment of narrowband IoT for rural hydrological monitoring in UNESCO biosphere environment	.
373				X	.		373			X		.		373			x			0	0	1		A mixed reality 3D system for the integration of X3DoM graphics with real-time IoT data	.
381			X		.		381	X		X		.		381						1	1	1		Water domiciliary distribution telemanagement value model	.
187				X	.		187		X	X		.		187				x		0	1	0		Toward A Sustainable Cyber-Physical System Architecture for Urban Water Supply Systemâˆ—âˆ—This work was supported by KLIMAFORSK programme(No. 244147/E10) from Research Council of Norway.	.
281		X			.		281		X	X		.		281		x				1	1	1		A WSN-based Monitoring System to Control Sewerage	.
333				X	.		333		X	X		.		333			x			0	0	1		Smart Rain Barrels: Advanced LID Management Through Measurement and Control	.
	31	21	34	41	.			42	31	33	42	.			21	24	27	46		25	23	10		80

## Sheet: Table S3 | All
Table S3: Categorization of all articles using ChatGPT (APA+Abstract)
	No.	title	apa	Abstract	.	IoT-based water quality monitoring	IoT-based wastewater infrastructure management	IoT-based water infrastructure management	Not Related	Explanation	.
	1	Low-cost automated GPS, electrical conductivity and temperature sensing device (EC + T Track) and Android platform for water quality monitoring campaigns	Blanco-GÃ³mez, P., JimÃ©nez-GarcÃ­a, J. L., & Cecilia, J. M. (2023). Low-cost automated GPS, electrical conductivity and temperature sensing device (EC+ T Track) and Android platform for water quality monitoring campaigns.Â HardwareX,Â 13, e00381.	Environmental and water quality monitoring are of utmost interest in a context where land use changes, uncontrolled agricultural practices, human settlements, tourism and other activities affect a watershed and condition the usage of their surface waters. Such is the case of Mar Menor lagoon in Southeast of Spain, where the EU H2020 SMARTLAGOON project stands and is implementing an intelligent en…	.	X				1. The paper titled "Low-cost automated GPS, electrical conductivity and temperature sensing device (EC+ T Track) and Android platform for water quality monitoring campaigns" (Blanco-Gmez, Jimnez-Garca, & Cecilia, 2023) is categorized under IoT-based water quality monitoring category because it presents a low-cost IoT-based device for monitoring water quality parameters.	.
	2	Quality Assessment and Monitoring of River Water Using IoT Infrastructure	Kumar, M., Singh, T., Maurya, M. K., Shivhare, A., Raut, A., & Singh, P. K. (2023). Quality Assessment and Monitoring of River Water Using IoT Infrastructure.Â IEEE Internet of Things Journal.	The quality assessment of water is a challenging task due to extensive experimental requirements. However, the process of water quality monitoring can be automated with the help of Internet of Things (IoT) devices using sensor probes. This paper presents the IoT infrastructure-based river water quality monitoring and assessment. Experiments were performed to assess the water quality during differ…	.	X				2. The paper titled "Quality Assessment and Monitoring of River Water Using IoT Infrastructure" (Kumar et al., 2023) is categorized under IoT-based water quality monitoring category as it describes a river water quality monitoring system using IoT infrastructure.	.
	3	Simultaneous Detection of Multiple Surface Acoustic Wave Sensor Tags for Water Quality Monitoring Utilizing Cellular Code-Reuse Approach	Suresh, K., Jeoti, V., Drieberg, M., Soeung, S., Iqbal, A., Stojanovi?, G. M., & Sarang, S. (2021). Simultaneous Detection of Multiple Surface Acoustic Wave Sensor Tags for Water Quality Monitoring Utilizing Cellular Code-Reuse Approach.Â IEEE Internet of Things Journal,Â 9(16), 14385-14399.	A water quality monitoring application often requires the deployment of Internet-of-Things (IoT) sensors over a wide water body with communication links among them to transmit, receive the data, and then uplink it to the cloud for further analytics. Deployment of this kind requires battery-assisted IoT sensors which require monitoring the battery level and replacement when necessary. It is thus d…	.	X				3. The paper titled "Simultaneous Detection of Multiple Surface Acoustic Wave Sensor Tags for Water Quality Monitoring Utilizing Cellular Code-Reuse Approach" (Suresh et al., 2021) is also categorized under IoT-based water quality monitoring category as it presents an IoT-based system for simultaneous detection of multiple water quality parameters.	.
	4	Estimating Phosphorus and COD Concentrations Using a Hybrid Soft Sensor: A Case Study in a Norwegian Municipal Wastewater Treatment Plant	Nair, A., Hykkerud, A., & Ratnaweera, H. (2022). Estimating phosphorus and cod concentrations using a hybrid soft sensor: A case study in a norwegian municipal wastewater treatment plant.Â Water,Â 14(3), 332.	Online monitoring of wastewater quality parameters is vital for an efficient and stable operation of wastewater treatment plants (WWTP). Several WWTPs rely on daily/weekly analysis of water samples rather than online automated wet-analyzers due to their high capital and maintenance costs. Soft-sensors are emerging as a viable alternative for real-time monitoring of parameters that either lack a r…	.		X			4. The paper titled "Estimating phosphorus and cod concentrations using a hybrid soft sensor: A case study in a Norwegian municipal wastewater treatment plant" (Nair et al., 2022) is categorized under Not Related category as it discusses the use of a hybrid soft sensor for wastewater treatment, but it does not utilize IoT technology.	.
	5	Wireless Airborne IoT Network for Rural Water Quality Monitoring	Abdullah, N. F., Alobaidy, H. A., & Nordin, R. (2022, November). Wireless Airborne IoT Network for Rural Water Quality Monitoring. InÂ 2022 IEEE 20th Student Conference on Research and Development (SCOReD)Â (pp. 190-194). IEEE.	Currently, the Chini Lake shores house around 500 indigenous people distributed across six villages with limited access to cellular tower communication coverage. This is mainly due to the challenging terrain profile and dense foliage. Therefore, it is important to establish a reliable line-of-sight (LoS) data transmission via a low-Altitude platform (LAP). The high availability but low-cost wirel…	.	X				5. The paper titled "Wireless Airborne IoT Network for Rural Water Quality Monitoring" (Abdullah, Alobaidy, & Nordin, 2022) is categorized under IoT-based water quality monitoring category as it describes an IoT-based wireless network for monitoring water quality in rural areas.	.
	6	A Scalable, Low-Maintenance, Smart Water Quality Monitoring System	Malissovas, A., Narayan, N., Boonen, T., & Patki, S. (2022, October). A Scalable, Low-Maintenance, Smart Water Quality Monitoring System. InÂ 2022 IEEE SensorsÂ (pp. 1-4). IEEE.	This paper presents a smart water quality monitoring system which can measure, in real-time, the salinity, acidity, and temperature of the water. The system consists of three main units: the sensor probe, that incorporates Si-based sensors, the measuring station, and the cloud infrastructure. The proposed Internet of Things system is deployed in real-world applications and validated against comme…	.	X				6. The paper titled "A Scalable, Low-Maintenance, Smart Water Quality Monitoring System" (Malissovas et al., 2022) is categorized under IoT-based water quality monitoring category as it presents a smart water quality monitoring system using IoT technology.	.
	7	Securing smart home networks with software-defined perimeter	Sallam, A., Refaey, A., & Shami, A. (2019, June). Securing smart home networks with software-defined perimeter. InÂ 2019 15th International Wireless Communications & Mobile Computing Conference (IWCMC)Â (pp. 1989-1993). IEEE.	Internet of Things (IoT) allows households to have real-time access to various services through a range of smart-home technologies. These technologies allow owners to reduce expenses for security, heating, cooling, lighting, electricity, and water. In general, using IoT and smart-home technologies enables new sharing and service economy paradigms to unlock the value of surplus resources. This req…	.				X	The paper is not related to water and wastewater networks management, therefore it falls under the "Not Related" category. The paper discusses the integration of Software-Defined Perimeter (SDP) with smart-home infrastructure for enhanced security. While the paper mentions the benefits of using IoT and smart-home technologies for water management, it does not discuss the use of IoT directly for w…	.
	8	A review of LoRa technology and its potential use for rural development in Indonesia	Murdyantoro, E., Nugraha, A. W. W., Wardhana, A. W., Fadli, A., & Zulfa, M. I. (2019, April). A review of LoRa technology and its potential use for rural development in Indonesia. InÂ AIP conference proceedingsÂ (Vol. 2094, No. 1, p. 020011). AIP Publishing LLC.	LoRa is a new technology platform for Internet of Think (IoT). LoRa was first developed and launched by Semtech Corporation in 2015. The presence of this technology provides a choice of wireless systems in addition to Wifi, bluetooth and GSM networks as infrastructure in Internet of Thinks. IoT is an information network that can connect various kinds of sensor and control equipment through the in…	.				X	The paper discusses the potential applications of LoRa technology in various fields, including water systems monitoring, which can include water quality monitoring, wastewater management, water distribution systems, and water conservation. Therefore, it falls under all four categories of IoT-based water quality monitoring, IoT-based wastewater management, IoT-based water distribution systems, and…	.
	9	Security Framework for IoT Cloud Services	Pacheco, J., Tunc, C., & Hariri, S. (2018, October). Security framework for IoT cloud services. InÂ 2018 IEEE/ACS 15th International Conference on Computer Systems and Applications (AICCSA)Â (pp. 1-6). IEEE.	The premise of the Internet of Things (IoT) is not only to connect computers and mobile devices, but also interconnect smart buildings, homes, and cities, as well as electrical and water grids, automobiles, and airplanes. IoT will lead to the development of a wide range of advanced information services that need to be processed in real-time and require data centers with large storage and computin…	.				X	Although the paper does not directly deal with water and wastewater management, it presents a security framework for IoT cloud services, which can be applied to any IoT-based systems including water and wastewater infrastructures. Therefore, we categorize this paper under all four IoT-based water management categories.	.
	10	New tree monitoring systems: From industry 4.0 to nature 4.0	Valentini, R., Belelli Marchesini, L., Gianelle, D., Sala, G., Yarovslavtsev, A., Vasenev, V., & Castaldi, S. (2019). New tree monitoring systems: from Industry 4.0 to Nature 4.0.Â Annals of Silvicultural research,Â 43(2), 84-88.	Recently, Internet of Things (IoT) technologies have grown rapidly and represent now a unique opportunity to improve our environmental monitoring capabilities at extremely low costs. IoT is a new system of thinking in which objects, animals or people are equipped with unique identifiers and transfer data to a network without requiring human-to-human or human-to-computer interaction. IoT has evolv…	.				X	The paper discusses the development of a new device called the TreeTalker that uses IoT technology to monitor water transport in trees, diametrical growth, spectral characteristics of leaves, and microclimatic parameters. However, the paper does not directly relate to IoT-based water quality monitoring, IoT-based wastewater management, IoT-based water distribution systems, or IoT-based water cons…	.
	11	A decision support system for scour management of road and railway bridges based on Bayesian networks	Maroni, A., Tubaldi, E., Val, D., McDonald, H., Lothian, S., Riches, O., & Zonta, D. (2019, September). A decision support system for scour management of road and railway bridges based on Bayesian networks. InÂ The 12th International Workshop on Structural Health MonitoringÂ (pp. 2437-2444).	Flood-induced scour is the excavation of material around bridge foundations due to the erosive action of flowing water and it is by far the leading cause of bridge failures worldwide. In the United States, scour is the cause of 22 bridges fail every year whereas in the UK, it contributed significantly to the 138 collapses of bridges in the last century. Monitoring an entire infrastructure network…	.				X	The paper does not directly use IoT for water and wastewater infrastructures and networks management. Therefore, it falls under the "Not Related" category. The paper proposes a Decision Support System (DSS) for road and railway bridge scour management that uses information from scour monitoring systems to estimate the present and future scour depth distribution using real-time information from mo…	.
	12	IoFT-FIS: Internet of farm things based prediction for crop pest infestation using optimized fuzzy inference system	Sharma, R. P., Dharavath, R., & Edla, D. R. (2023). IoFT-FIS: Internet of farm things based prediction for crop pest infestation using optimized fuzzy inference system.Â Internet of Things,Â 21, 100658.	Advanced farming techniques help to know the appropriate environmental conditions, soil quality, water and fertilizer needs, and crop monitoring during each plant's growth phase, resulting in higher yields. Also, IoT-compatible crop monitoring and data collection systems can help identify crop diseases and the breeding status of pathogenic pests. Extracting data from samples collected from the co…	.				X	The paper proposes an Internet of Things (IoT) based system for predicting crop pest infestation in agriculture fields. While the paper does not directly relate to water and wastewater networks management, it uses an IoT-enabled wireless sensor network to collect data on environmental factors such as soil moisture, rainfall, and temperature. The data collected is then used to design a fuzzy infer…	.
	13	Designing smart pulse flow meters using diversion analysis	Micheev, P. S., Muraviev, K. A., Rezchikova, E. V., & Selivanov, K. V. (2023). Designing smart pulse flow meters using diversion analysis.Â International Journal of Electrical and Computer Engineering,Â 13(2), 1338.	The operation of modern housing infrastructure is characterized by a constant increase in the cost of the limited resources used. This necessitates the priority implementation in the concept of a smart home of elements aimed at resource saving and their rational management. The study provides an overview of the implementation architectures of the internet of things (IoT) concept in the constructi…	.			X		7. The paper titled "Designing smart pulse flow meters using diversion analysis" (Micheev et al., 2023) is categorized under IoT-based water distribution systems category as it describes the design of smart pulse flow meters using IoT technology for water distribution systems.	.
	14	IoT Based Remote Monitoring, Control, and Protection of Irrigation Water Pumping System	Kirar, M. K. (2023). IoT Based Remote Monitoring, Control, and Protection of Irrigation Water? Pumping System?.Â Journal of Operation and Automation in Power Engineering,Â 11(1), 69-75.	The Internet of Things (IoT) is a multidisciplinary concept that includes a wide range of application domains and device capabilities. The IoT technology provides a platform that allows apparatus to be monitored by sensors, connected using a communication channel, and controlled remotely across a network infrastructure. This paper represents the IoT-based remote monitoring, control, and protectio…	.					The paper focuses on IoT-based remote monitoring, control, and protection of irrigation water pumping systems. It uses sensors to measure supply voltage and motor current to estimate operating conditions and provide protection. The measured parameters are sent to the user through the SIM900 GSM module for remote monitoring and control purposes. The paper is categorized under IoT-based water distr…	.
	15	Development of a distributed MR-IoT method for operations and maintenance of underground pipeline network	Li, W., Ye, Z., Wang, Y., Yang, H., Yang, S., Gong, Z., & Wang, L. (2023). Development of a distributed MR-IoT method for operations and maintenance of underground pipeline network.Â Tunnelling and Underground Space Technology,Â 133, 104935.	The underground pipeline network (UPN) is an essential infrastructure and plays an irreplaceable role in national defense and urban activities. The complexity of structural environment and management makes its operation and maintenance difficult. To solve this problem, a distributed mixed reality (MR) and internet of things (IoT) system is developed through game thinking. Firstly, digital models …	.			X		8. The paper titled "Development of a distributed MR-IoT method for operations and maintenance of underground pipeline network" (Li et al., 2023) is also categorized under IoT-based water distribution systems category as it presents an IoT-based method for operations and maintenance of underground pipeline network.	.
	16	An Intelligent Modular Water Monitoring IoT System for Real-Time Quantitative and Qualitative Measurements	Syrmos, E., Sidiropoulos, V., Bechtsis, D., Stergiopoulos, F., Aivazidou, E., Vrakas, D., ... & Vlahavas, I. (2023). An Intelligent Modular Water Monitoring IoT System for Real-Time Quantitative and Qualitative Measurements.Â Sustainability,Â 15(3), 2127.	This study proposes a modular water monitoring IoT system that enables quantitative and qualitative measuring of water in terms of an upgraded version of the water infrastructure to sustain operational reliability. The proposed method could be used in urban and rural areas for consumption and quality monitoring, or eventually scaled up to a contemporary water infrastructure enabling water provide…	.	X				9. The paper titled "An Intelligent Modular Water Monitoring IoT System for Real-Time Quantitative and Qualitative Measurements" (Syrmos et al., 2023) is categorized under IoT-based water quality monitoring category as it describes an intelligent modular water monitoring system using IoT technology.	.
	17	WaterPurifier: A scalable system to prevent the DNS water torture attack in 5G-enabled SIoT network	Yin, L., Zhu, M., Liu, W., Luo, X., Wang, C., & Li, Y. (2023). WaterPurifier: A scalable system to prevent the DNS water torture attack in 5G-enabled SIoT network.Â Computer Communications,Â 199, 186-195.	Social Internet of Things (SIoT) network contains a huge number of smart devices and is rich in social behavior relationships between these objects, especially in 5G-abled SIoT network. However, vulnerable devices and assailable applications or services in SIoT give attackers the opportunity to conduct DNS water torture (DNSWT) attacks for domain name system (DNS) infrastructures, which can cause…	.				X	The paper proposes a defensive system called WaterPurifier to protect the Social Internet of Things (SIoT) network from DNS water torture (DNSWT) attacks. The paper is not directly related to water and wastewater infrastructures and networks management, so it does not fall under the first four categories. However, the WaterPurifier system proposed in the paper can be used for IoT-based water qual…	.
	18	Semi-supervised machine learning analysis of crop color for autonomous irrigation	Tschand, A. (2023). Semi-supervised machine learning analysis of crop color for autonomous irrigation.Â Smart Agricultural Technology,Â 3, 100116.	Agricultural irrigation wastage, especially from inefficient infrastructure in developing nations, is among the leading causes of the global water shortage epidemic, which affects an estimated 2.8 billion people worldwide. In this project, a three-component cloudless internet-of-things (IoT)-based irrigation network is designed and constructed to affordably integrate into existing irrigation infr…	.				X	10. The paper titled "Semi-supervised machine learning analysis of crop color for autonomous	.
	19	Monitoring of rainfall-induced landslides at Songmao and Lushan, Taiwan, using IoT and big data-based monitoring system	Lau, Y. M., Wang, K. L., Wang, Y. H., Yiu, W. H., Ooi, G. H., Tan, P. S., ... & Chen, C. W. (2022). Monitoring of rainfall-induced landslides at Songmao and Lushan, Taiwan, using IoT and big data-based monitoring system.Â Landslides, 1-26.	This study presents a new landslide monitoring system, which is designed to be cost-effective, robust, flexible, and scalable, aiming for long-term and real-time monitoring and large-scale deployment in harsh and remote environments. This wireless monitoring system consists of the hybrid sensor node (including the GNSS receiver and MEMS accelerometer), the GNSS antenna, the power supply system, a…	.				X	The paper focuses on monitoring rainfall-induced landslides using an IoT-based monitoring system. Although water and its behavior are mentioned in the paper, the paper does not deal with IoT-based water quality monitoring, wastewater management, water distribution systems, or water conservation. Therefore, the paper falls under the "Not Related" category.	.
	20	Digital Water Services using Digital Twin paradigm	Ciliberti, F. G., Berardi, L., Laucelli, D. B., & Giustolisi, O. (2023). Digital Water Services using Digital Twin paradigm. InÂ IOP Conference Series: Earth and Environmental ScienceÂ (Vol. 1136, No. 1, p. 012002). IOP Publishing.	In the last years, the digital transition concept has spread all over public and private life as a process designed for improving problem solving in industry by the combination of models, information, and connectivity technologies. In the Water Distribution Networks (WDNs) management sector, the innovations in the areas of ICT/IoT, virtual representation of infrastructure elements in GIS/BIM plat…	.	X				11. Ciliberti et al. proposed a digital twin-based approach for digital water services. The paper discussed the potential of the IoT-based digital twin for water quality monitoring, which directly relates to the IoT-based water quality monitoring category.	.
	21	Design and Implementation: An IoT-Framework-Based Automated Wastewater Irrigation System	Habib, S., Alyahya, S., Islam, M., Alnajim, A. M., Alabdulatif, A., & Alabdulatif, A. (2022). Design and Implementation: An IoT-Framework-Based Automated Wastewater Irrigation System.Â Electronics,Â 12(1), 28.	Automation is being fueled by a multifaceted approach to technological advancements, which includes advances in artificial intelligence, robotics, sensors, and cloud computing. The use of automated, as opposed to conventional, systems, has become more popular in recent years. Modern agricultural technology has played an important role in the development of Saudi Arabia in addition to upgrading in…	.		X			12. Habib et al. designed and implemented an IoT-based automated wastewater irrigation system, which falls under IoT-based wastewater management.	.
	22	Complexities of the urban drinking water systems in Ethiopia and possible interventions for sustainability	Beker, B. A., & Kansal, M. L. (2023). Complexities of the urban drinking water systems in Ethiopia and possible interventions for sustainability.Â Environment, Development and Sustainability, 1-31.	Rapid urbanization in developing countries has imposed threats and challenges to basic urban infrastructures like drinking water, transportation, and energy systems. The existing urban drinking water systems (UDWS) are highly stressed and unsustainable, particularly under changing hydroclimatic conditions, population growth, changing socioeconomic conditions, government decisions, and various pol…	.				X	Based on the provided abstract, Paper 22 is categorized as follows: IoT-based water distribution systems: The paper discusses issues related to water distribution networks and proposes interventions that involve the use of supervisory control and data acquisition (SCADA) and Internet of Things (IoT) technologies to monitor and control water distribution networks. IoT-based water conservation: The…	.
	23	Role of IoT in Smart City: A Review	Channi, H. K. (2022). Role of IoT in Smart City: A Review.Â Smart Energy and Advancement in Power Technologies: Select Proceedings of ICSEAPT 2021 Volume 1, 415-431.	Taking advantage of IoT technologies for smart cities and embedded devices today leads to economic growth, infrastructure and the climate strengthened, transit networks strengthened, and public asset management costs reduced. Nowadays, cities are based on creating clever towns to deal with the increasing population and urbanization and globalization. Smart city is a philosophy of using technology…	.				X	13. Channi's paper reviewed the role of IoT in smart cities, but it did not directly relate to IoT-based water or wastewater infrastructure management. Therefore, we put it under the Not Related category.	.
	24	An automated standalone hand wash outdoor deployment unit for infectious disease control	Olufajo, O. O., & Balogun, O. A. (2023). An automated standalone hand wash outdoor deployment unit for infectious disease control.Â Journal of Medical Engineering & Technology,Â 47(2), 104-120.	The recent global coronal virus pandemic raised increased awareness towards ideal hand hygiene procedures as promoted by World Health Organisation (WHO) and other related health care associations. Compliance to the prescribed procedure has been rather difficult as people gradually get accustomed to this effective hand wash habit, especially with regards the 20 s hand rub process. Traditional hand…	.				X	The paper falls under the category of IoT-based water quality monitoring because it describes the use of IoT infrastructure to monitor fluid levels in the automated standalone hand wash unit. Additionally, it falls under the category of IoT-based water conservation because the unit designed in the paper aims to reduce water wastage potential.	.
	25	Smart Water Metering Implementation	Mankad, U., & Arolkar, H. (2022). Smart Water Metering Implementation. InÂ Smart Trends in Computing and Communications: Proceedings of SmartCom 2022Â (pp. 721-731). Singapore: Springer Nature Singapore.	Throughout the past years, the Indian government is putting its best efforts in developing smart cities by applying smart solutions for infrastructures and services. Smart water management is one of the key service areas where now it is a high time to work for. Many industries and researchers are contributing to incorporate smart techniques for smart water system like sensor-based monitoring, rea…	.			X		14. Mankad and Arolkar proposed a smart water metering implementation that falls under the IoT-based water distribution systems category.	.
	26	Secure Swarm UAV-Assisted Communications With Cooperative Friendly Jamming	Dang-Ngoc, H., Nguyen, D. N., Ho-Van, K., Hoang, D. T., Dutkiewicz, E., Pham, Q. V., & Hwang, W. J. (2022). Secure swarm UAV-assisted communications with cooperative friendly jamming.Â IEEE Internet of Things Journal,Â 9(24), 25596-25611.	This article proposes a cooperative friendly jamming framework for swarm unmanned aerial vehicle (UAV)-assisted amplify-and-forward (AF) relaying networks with wireless energy harvesting (EH). In particular, we consider a swarm of hovering UAVs that relays information from a terrestrial base station to a distant mobile user and simultaneously generates friendly jamming signals to interfere/obfusc…	.				X	The paper discusses a cooperative friendly jamming framework for swarm unmanned aerial vehicle (UAV)-assisted amplify-and-forward (AF) relaying networks with wireless energy harvesting (EH). Although the paper does not directly mention water and wastewater networks management, it states that the proposed framework helps secure communications for various applications that require large coverage, i…	.
	27	Smart water campus - a testbed for smart water applications	Oberascher, M., Kinzel, C., Kastlunger, U., SchÃ¶pf, M., Grimm, K., Plaiasu, D., ... & Sitzenfrei, R. (2022). Smart water campusâ€“a testbed for smart water applications.Â Water Science & Technology,Â 86(11), 2834-2847.	The Internet of Things concept includes low-cost sensors in combination with innovative wireless communication technology, supporting a large-scale implementation of measurement equipment in the field of urban water infrastructure (UWI). At present, the potentials of such smart solutions are often unclear, making it difficult for decision-makers to justify investments. To address this shortcoming…	.				X	I categorized this paper under IoT-based water quality monitoring and IoT-based water distribution systems. The paper discusses the implementation of low-cost sensors and wireless communication technology in the University of Innsbruck's water infrastructure to monitor and control it in high resolution. The paper also talks about integrating water distribution and urban drainage networks into an …	.
	28	Optimising the energy-water-CO2 nexus of a water distribution network	Munsamy, M., & Telukdarie, A. (2022). Optimising the energy-water-CO2 nexus of a water distribution network.Â Cleaner Engineering and Technology,Â 11, 100574.	The digital age attracts significant challenges in the delivery of fourth industrial revolution (4IR) based technologies. The energy-water-CO2 nexus benefits of 4IR technologies are a significantly greater challenge, especially across the water distribution network (WDN). A business process based energy-water-CO2 nexus model was developed with the capacity to comprehensively simulate a WDN, and p…	.			X		15. Munsamy and Telukdarie proposed an energy-water-CO2 nexus optimization approach for water distribution networks, which directly relates to the IoT-based water distribution systems and IoT-based water conservation categories.	.
	29	High-Resolution Tap-Based IoT System for Flow Data Collection and Water End-Use Analysis	Luk, M. H., Yau, C. W., Pong, P. W., Lee, A. P., Ngai, E. C., & Lui, K. S. (2022). High-resolution tap-based IoT system for flow data collection and water end-use analysis.Â IEEE Internet of Things Journal,Â 9(22), 22822-22835.	Knowledge on water-use patterns in residential settings can help policymakers formulate well-targeted water conservation measures and evaluate the efficacy of such measures. Prior studies have applied machine learning techniques to disaggregate household-level water consumption data, collected by smart meters, into specific end-use categories, such as showering, basin use, kitchen use, and use by…	.				X	This paper (29) directly uses IoT for water management and falls under two categories: IoT-based water quality monitoring and IoT-based water conservation. The paper presents a high-resolution tap-based IoT system for flow data collection and water end-use analysis, which helps policymakers to evaluate water conservation measures. The system consists of Wi-Fi-based tap sensors, gateway infrastruc…	.
	30	Remote poultry management system for small to medium scale producers using IoT	Chigwada, J., Mazunga, F., Nyamhere, C., Mazheke, V., & Taruvinga, N. (2022). Remote poultry management system for small to medium scale producers using IoT.Â Scientific African,Â 18, e01398.	The demand for poultry products continues to increase in the world. The prevailing global climate change calls for improved poultry management systems to maintain optimal environmental conditions for boosting productivity. Increased food security based on sound, equitable and sustainable food production systems that utilize modern automation technologies is essential for all nations to be able to…	.				X	The paper is about an IoT-based system for managing poultry farms remotely. Although the paper does not directly focus on water and wastewater networks management, it indirectly mentions the monitoring and regulation of water levels and ammonia gas in the poultry house, which can be categorized under IoT-based water quality monitoring and IoT-based wastewater management, respectively. The system …	.
	31	NB-IoT Coverage and Sensor Node Connectivity in Dense Urban Environments: An Empirical Study	Yau, C. W., Jewsakul, S., Luk, M. H., Lee, A. P., Chan, Y. H., Ngai, E. C., ... & Liu, J. (2022). NB-IoT Coverage and Sensor Node Connectivity in Dense Urban Environments: An Empirical Study.Â ACM Transactions on Sensor Networks (TOSN),Â 18(3), 1-36.	Wireless sensor networks have enabled smart infrastructures and novel applications. With the recent roll-out of Narrowband IoT (NB-IoT) cellular radio technology, wireless sensors can be widely deployed for data collection in cities around the world. However, empirical evidence regarding the coverage and connectivity of NB-IoT in dense urban areas is limited. This article presents an empirical st…	.				X	16. Yau et al. proposed an NB-IoT coverage and sensor node connectivity study for dense urban environments. The paper did not directly relate to IoT-based water or wastewater infrastructure management. Therefore, we put it under the Not Related category.	.
	32	The city management based on smart information system using digital technologies in China	Huang, Y., Peng, H., Sofi, M., Zhou, Z., Xing, T., Ma, G., & Zhong, A. (2022). The city management based on smart information system using digital technologies in China.Â IET Smart Cities,Â 4(3), 160-174.	Scientific planning, digital management of construction and intelligent service are needed for a smart city. This paper focusses on city management based on the smart information system and digital technologies in China. The establishment of the smart intercommunication system of landscape, water conservancy, environmental protection and other industries is basic for a smart city. This paper intr…	.				X	Based on the abstract, this paper discusses the use of digital technologies, including IoT, for the management of various aspects of a smart city, including water conservancy. However, it does not directly focus on IoT-based water or wastewater networks management, but rather on the broader concept of city management using digital technologies. Therefore, we can categorize this paper as related t…	.
	33	Old MacDonald had a smart farm: Building a testbed to study cybersecurity in smart dairy farming	Agarwal, S., Rashid, A., & Gardiner, J. (2022, August). Old MacDonald had a smart farm: Building a testbed to study cybersecurity in smart dairy farming. InÂ Proceedings of the 15th Workshop on Cyber Security Experimentation and TestÂ (pp. 1-9).	With the advent of modern smart farming and agritech technology, farms are increasingly becoming an example of a cyber-physical system (CPS). For example, a modern dairy farm will feature internet-of-things (IoT) devices for monitoring animals and fully automated milking parlors. When considering the cyber security of CPS, we often talk about critical national infrastructure (CNI) with a focus on…	.				X	Based on the abstract, Paper 33 focuses on the design of a testbed to study cybersecurity in smart dairy farming, which involves the use of IoT devices for monitoring animals and fully automated milking parlors. While the paper does not directly address water or wastewater management, it does mention IoT devices, which are a core component of IoT-based water quality monitoring. Therefore, Paper 3…	.
	34	IoT-Enabled Smart Healthcare Infrastructure Maximises Energy Efficiency	Addanke , S. ., Anandan, R. ., & Krishna, P. V. . (2022). IoT-Enabled Smart Healthcare Infrastructure Maximises Energy Efficiency.Â International Journal on Recent and Innovation Trends in Computing and Communication,Â 10(8), 88â€“95. https://doi.org/10.17762/ijritcc.v10i8.5680	Advancements in IoT-based applications have become the cutting-edge technology among researchers due to the wide availability of the Internet. In order to make the application more user-friendly, Android-based and Web-based technologies have become increasingly important in this cutting-edge technology. Smart cities, Internet of Things(IoT), Smart health care systems are the technology of the fut…	.				X	The paper focuses on the energy efficiency of smart healthcare infrastructure using IoT-enabled systems. Although the paper does not directly address IoT-based water and wastewater networks management, it indirectly discusses the potential benefits of using IoT for energy consumption in smart cities, including e-health systems. Therefore, the paper falls under the category of "IoT-based water con…	.
	35	Machine Learning-Based Prediction of Node Localization Accuracy in IIoT-Based MI-UWSNs and Design of a TD Coil for Omnidirectional Communication	Gang, Q., Muhammad, A., Khan, Z. U., Khan, M. S., Ahmed, F., & Ahmad, J. (2022). Machine Learning-Based Prediction of Node Localization Accuracy in IIoT-Based MI-UWSNs and Design of a TD Coil for Omnidirectional Communication.Â Sustainability,Â 14(15), 9683.	This study aims to realize Sustainable Development Goals (SDGs), i.e., SDG 9: Industry Innovation and Infrastructure and SDG 14: Life below Water, through the improvement of localization estimation accuracy in magneto-inductive underwater wireless sensor networks (MI-UWSNs). The accurate localization of sensor nodes in MI communication can effectively be utilized for industrial IoT applications, …	.			X		17. Gang et al. proposed a machine learning-based prediction approach for node localization accuracy in IIoT-based MI-UWSNs, which falls under the IoT-based water distribution systems category.	.
	36	MAGLOC: A magnetic induction based localization scheme for fresh food logistics	Pal, A., & Kant, K. (2022). MagLoc: A magnetic induction based localization scheme for fresh food logistics.Â Internet of Things,Â 19, 100552.	An IoT infrastructure to continuously monitor the fresh food supply chain can quickly detect food quality and contamination issues and thereby reduce costs and food wastage. This, in turn, involves several challenges including the development of inexpensive quality/contamination sensors to be deployed in a fine grain manner in the food boxes, technologies for sensor level communications, online d…	.				X	I categorized paper 36 under "IoT-based water quality monitoring" as it proposes an IoT-based infrastructure to monitor the quality and contamination of fresh food during transportation using near-field magnetic induction (NFMI) based communication and localization. Although it is not directly related to water, the paper addresses the issue of food wastage, which is indirectly related to water co…	.
	37	Flexible triboelectric nanogenerator toward ultrahigh-frequency vibration sensing	Lin, Z., Sun, C., Zhang, G., Fan, E., Zhou, Z., Shen, Z., ... & Yang, J. (2022). Flexible triboelectric nanogenerator toward ultrahigh-frequency vibration sensing.Â Nano Research,Â 15(8), 7484-7491.	Flexible high-frequency vibration sensors are highly desirable in various real-world applications such as structural health monitoring, environmental monitoring, and the internet of things. However, developing a facile and effective method to fabricate vibration sensors simultaneously featuring high vibration frequency response-ability and flexibility remains a grand challenge. Herein, we report …	.				X	Based on the abstract, the paper discusses the development of a flexible ultrahigh-frequency triboelectric vibration sensor (UTVS) that can be used in various applications including infrastructure monitoring. While the paper does not directly mention water or wastewater networks, it does mention the use of the UTVS in real-time water pipeline leak monitoring, which falls under the category of IoT…	.
	38	Online monitoring and sampling analysis of siltation in the middle route of the south-to-north water diversion project	Zhang, D., Han, X., Zhong, Q., Wang, S., Ding, L., Liu, Y., ... & Wang, F. (2022). Online monitoring and sampling analysis of siltation in the middle route of the South-to-North water diversion project.Â Frontiers in Environmental Science, 1149.	The middle route project (MRP) of the South to North Water Diversion Project is a significant infrastructure and alleviating water scarcity in Northern China. MRP suffered from untraditional siltation problems. Obvious siltation occurred in the regulating reservoir at the end of the channel and some locations with weak hydrodynamic conditions in the channel when the mineral siltation concentratio…	.	X				18. Zhang et al. proposed an online monitoring and sampling analysis approach for siltation in the middle route of the South-to-North water diversion project, which directly relates to the IoT-based water quality monitoring category.	.
	39	Lessons learned from an IoT deployment for condition monitoring at the Port of Felixstowe	Merino, J., Sasidharan, M., Herrera, M., Zhou, H., del Castillo, A. C., Parlikad, A. K., ... & Poulter, K. (2022). Lessons learned from an IoT deployment for condition monitoring at the Port of Felixstowe.Â IFAC-PapersOnLine,Â 55(19), 217-222.	The ports sector is critical to global trade. While digitalisation of infrastructure asset management in other sectors such as manufacturing, healthcare, water supply, railway and road is rapidly growing with the possibilities of the Internet of Things (IoT) solutions, the maritime industry lags significantly behind. IoT solutions and the near real-time data they produce provide new impetus to im…	.				X	The paper discusses an IoT-based asset management solution at the Port of Felixstowe, which does not directly relate to water or wastewater networks management. However, the IoT deployment is used for condition monitoring which falls under the IoT-based water quality monitoring category. Therefore, the paper is categorized under IoT-based water quality monitoring.	.
	40	A Self-Tuning Cyber-Attacks' Location Identification Approach for Critical Infrastructures	Al-Abassi, A., Jahromi, A. N., Karimipour, H., Dehghantanha, A., Siano, P., & Leung, H. (2021). A self-tuning cyber-attacksâ€™ location identification approach for critical infrastructures.Â IEEE Transactions on Industrial Informatics,Â 18(7), 5018-5027.	The integration of the communications network and the Internet of Things in today's critical infrastructures facilitates intelligent and online monitoring of these systems. However, although critical infrastructure's digitalization brings tremendous advantages and opportunities for remote access and control, it significantly increases cyber-attack's vulnerability. Therefore, efficient and proper …	.				X	Explanation: The paper discusses the use of a deep learning-based cyber-attack detection and location identification system for critical infrastructures, including gas pipeline and water distribution supervisory control and data acquisition systems. While the paper does not directly focus on the use of IoT in water and wastewater infrastructure, it indirectly uses IoT through the integration of t…	.
	41	Generalised network architectures for environmental sensing: Case studies for a digitally enabled environment	Mead, M. I., Bevilacqua, M., Loiseaux, C., Hallett, S. H., Jude, S., Emmanouilidis, C., ... & Williams, L. (2022). Generalised network architectures for environmental sensing: Case studies for a digitally enabled environment.Â Array,Â 14, 100168.	A digitally enabled environment is a setting which incorporates sensors coupled with reporting and analytics tools for understanding, observing or managing that environment. Large scale data collection and analysis are a part of the emerging digitally enabled approach for the characterisation and understanding of our environment. It is recognised as offering an effective methodology for addressin…	.	X				19. Mead et al. proposed a generalized network architecture for environmental sensing, which includes water quality monitoring, falls under the IoT-based water quality monitoring category.	.
	42	Learning Graph Structures With Transformer for Multivariate Time-Series Anomaly Detection in IoT	Chen, Z., Chen, D., Zhang, X., Yuan, Z., & Cheng, X. (2021). Learning graph structures with transformer for multivariate time-series anomaly detection in IoT.Â IEEE Internet of Things Journal,Â 9(12), 9179-9189.	Many real-world Internet of Things (IoT) systems, which include a variety of Internet-connected sensory devices, produce substantial amounts of multivariate time-series data. Meanwhile, vital IoT infrastructures, such as smart power grids and water distribution networks are frequently targeted by cyberattacks, making anomaly detection an important study topic. Modeling such relatedness is, nevert…	.				X	Explanation: The paper discusses a new framework for multivariate time-series anomaly detection in IoT, including smart water distribution networks. The paper specifically mentions modeling such relatedness is unavoidable for an effective anomaly detection system given the intricate topological and nonlinear connections among sensors. Additionally, the paper discusses automatically learning a gra…	.
	43	IOT based environment harmful gases detecting and controlling system	Kumari, D. R., Mahender, K., Chitti, S., & Sivalenka, V. (2022, May). IOT based environment harmful gases detecting and controlling system. InÂ AIP Conference ProceedingsÂ (Vol. 2418, No. 1, p. 030041). AIP Publishing LLC.	The quick development of office infrastructure as well as additionally industrial plants and also the use of vehicles generating ecological concerns like contaminants (Water, Air, Noise), weather changes. Proposing IOT Based Air Pollution Monitoring, as well as managing System, is used to take note of the Air Quality over a world full web server making use of Internet. It will undoubtedly turn on…	.				X	Explanation: The paper discusses an IoT-based air pollution monitoring and controlling system that detects harmful gases and monitors air quality. Therefore, it does not directly relate to water or wastewater networks management, and it falls under the "IoT-based water conservation" category, as air quality monitoring can indirectly contribute to water conservation efforts. Additionally, it falls…	.
	44	Joining Sustainable Design and Internet of Things Technologies on Campus: The IPVC Smartbottle Practical Case	Curralo, A. F., Lopes, S. I., Mendes, J., & Curado, A. (2022). Joining sustainable design and internet of things technologies on campus: the IPVC smartbottle practical case.Â Sustainability,Â 14(10), 5922.	Higher education institutions (HEIs) are favored environments for the implementation of technological solutions that accelerate the generation of smart campi, given the dynamic ecosystem they create based on the involvement of inspired and motivated human resources (students, professors, and researchers), moving around in an atmosphere of advanced digital infrastructures and services. Moreover, H…	.				X	Based on the abstract, the paper discusses the design and implementation of an IoT-enabled smart water bottle system for eliminating the use of single-use plastic water bottles on the campus of the Polytechnical Institute of Viana do Castelo (IPVC), an HEI with nearly 6000 students. The system aims to conserve water and reduce plastic waste. Therefore, it falls under the categories of IoT-based w…	.
	45	Graph Layer Security: Encrypting Information via Common Networked Physics	Wei, Z., Wang, L., Sun, S. C., Li, B., & Guo, W. (2022). Graph layer security: Encrypting information via common networked physics.Â Sensors,Â 22(10), 3951.	The proliferation of low-cost Internet of Things (IoT) devices has led to a race between wireless security and channel attacks. Traditional cryptography requires high computational power and is not suitable for low-power IoT scenarios. Whilst recently developed physical layer security (PLS) can exploit common wireless channel state information (CSI), its sensitivity to channel estimation makes th…	.				X	Explanation: The paper discusses a new approach to wireless security for IoT devices using physical layer security based on the common physics shared between IoT transceivers. The proposed method, called graph layer security (GLS), is evaluated against designed active and passive attackers using IEEE 39-Bus system. However, the paper does not focus on any specific application of IoT in water and …	.
	46	Development of an Intelligent Urban Water Network System	Joseph, K., Sharma, A. K., & van Staden, R. (2022). Development of an Intelligent Urban Water Network System.Â Water,Â 14(9), 1320.	Water and wastewater services have been provided through centralised systems for more than a century. The operational and management approaches of the water systems face challenges induced by population growth, urbanisation, and ageing infrastructure. Recent advancements in water system engineering include the development of intelligent water networks. These intelligent networks address managemen…	.			X		20. Joseph et al. proposed an intelligent urban water network system that directly relates to the IoT-based water distribution systems category.	.
	47	ASHRAY: Enhancing Water-usage Comfort in Developing Regions using Data-driven IoT Retrofits	Abbas, S., Ehsan, A., Ahmed, S., Khan, S. A., Jadoon, T. M., & Alizai, M. H. (2022). ASHRAY: Enhancing Water-usage Comfort in Developing Regions using Data-driven IoT Retrofits.Â ACM Transactions on Cyber-Physical Systems (TCPS),Â 6(2), 1-28.	In developing countries, majority of the households use overhead water tanks to have running water. These water tanks are exposed to the elements, which usually render the tap water uncomfortable to use, given the extreme subtropical weather conditions. Externally weatherproofing these tanks to maintain the groundwater temperature is short-lived, and only results in a marginal (0.5Â°C-1Â°C) impro…	.	X				21. ASHRAY: This paper proposes a system for enhancing water usage comfort in developing regions using data-driven IoT retrofits, making it relevant to the IoT-based water quality monitoring category.	.
	48	Subsurface drip irrigation and ICT for the innovative irrigation water management: application to a citrus crop (C. reticulata 'Tardivo di Ciaculli')	Franco, L., Giardina, G., Tuker, J., Motisi, A., & Provenzano, G. (2019, June). Subsurface drip irrigation and ICT for the innovative irrigation water management: application to a citrus crop (C. reticulata Tardivo di Ciaculli). InÂ IX International Symposium on Irrigation of Horticultural Crops 1335Â (pp. 453-460).	Subsurface drip irrigation (SDI) is considered one of the most efficient irrigation systems because it allows the optimization of crop water productivity maximizing, at the same time, farmers' economic benefit. However, to take full advantage of SDI systems it is necessary to prevent emitter obstructions caused by root intrusion, as well as to apply water-saving strategies, such as regulated defi…	.			X		22. Subsurface drip irrigation and ICT: This paper discusses a system that integrates ICT and subsurface drip irrigation to optimize water management in a citrus crop, making it relevant to both IoT-based water distribution systems and IoT-based water conservation categories.	.
	49	Federated Learning for Intrusion Detection in the Critical Infrastructures: Vertically Partitioned Data Use Case	Novikova, E., Doynikova, E., & Golubev, S. (2022). Federated Learning for Intrusion Detection in the Critical Infrastructures: Vertically Partitioned Data Use Case.Â Algorithms,Â 15(4), 104.	One of the challenges in the Internet of Things systems is the security of the critical data, for example, data used for intrusion detection. The paper research construction of an intrusion detection system that ensures the confidentiality of critical data at a given level of intrusion detection accuracy. For this goal, federated learning is used to train an intrusion detection model. Federated l…	.				X	Explanation: The paper discusses the use of federated learning to construct an intrusion detection system that ensures the confidentiality of critical data in IoT systems, specifically in critical infrastructures. The authors consider the case when different entities have data that are different in attributes, which they believe is a common situation for critical systems constructed using IoT tec…	.
	50	ADO: An open digital end-to-end tank based aquaculture platform	Suciu, I., Boquet, G., Tuset-PeirÃ³, P., & Vilajosana, X. (2022). ADO: An open digital end-to-end tank based aquaculture platform.Â HardwareX,Â 11, e00283.	The ADO project proposes the development of an IoT solution that allows the digitization of the aquaculture sector, developing the basic elements (data acquisition systems, data storage system and visualization platform) in open source format. Hence, ADO makes it easier for small and medium-sized producers to obtain success stories with limited technology background and smaller economic investmen…	.				X	Explanation: The paper proposes the development of an IoT solution for aquaculture sector digitization. It includes data acquisition systems, data storage system, and a visualization platform in open-source format. Although the paper does not directly focus on water quality, wastewater management, water distribution systems, or water conservation, it falls under IoT-based water quality monitoring…	.
	51	Recent development of nano-satellite constellation as iot communication platform	Gaikwad, M., Khanapurkar, M., & Untawale, S. (2022, March). Recent development of nano-satellite constellation as iot communication platform. InÂ AIP Conference ProceedingsÂ (Vol. 2424, No. 1, p. 060007). AIP Publishing LLC.	The Key market player sectors are Agriculture, Healthcare, Space and under water Sciences, Multi-Model logistics etc. The robust Internet-of-Things systems are used to exchange the sensor data and actuator control information across network infrastructures. Over several years satellite technologies are used to serve to ever-increasing demands of wireless communication in terms of volume of traffi…	.				X	Explanation: The paper proposes the use of nano-satellite constellations for continuous monitoring and tracking of IoT data using an open platform network called LoRa Wide Area Network. The proposed concept can be applied to various sectors including agriculture, healthcare, and space sciences. The paper falls under the IoT-based wastewater management category because it discusses the use of IoT …	.
	52	Trusted Data Storage Architecture for National Infrastructure	Wang, Y., Fan, R., Liang, X., Li, P., & Hei, X. (2022). Trusted Data Storage Architecture for National Infrastructure.Â Sensors,Â 22(6), 2318.	National infrastructure is a material engineering facility that provides public services for social production and residentsâ€™ lives, and a large-scale complex device or system is used to ensure normal social and economic activities. Due to the problems of difficult data collection, long project period, complex data, poor security, difficult traceability and data intercommunication, the archives…	.				X	I categorized this paper under all four categories of IoT-based water quality monitoring, IoT-based wastewater management, IoT-based water distribution systems, and IoT-based water conservation because the proposed trusted data storage architecture is based on blockchain and Internet of Things (IoT) devices for real-time collection of data from national infrastructure. The paper highlights the us…	.
	53	AgriWealth: IoT based farming system	Sarpal, D., Sinha, R., Jha, M., & Padmini, T. N. (2022). AgriWealth: IoT based farming system.Â Microprocessors and Microsystems,Â 89, 104447.	The agricultural sector in India accounts for a significant part of the country's GDP and is the primary income source for many farmers in rural areas. While it creates employment opportunities and offers food security for the entire nation, the lack of infrastructure and resources might be limiting its potential to thrive further. One of the aspects addressed in this paper is low yield productio…	.			X		23. AgriWealth: This paper discusses an IoT-based farming system, making it relevant to the IoT-based water conservation category.	.
	54	Evaporation Forecasting through Interpretable Data Analysis Techniques	Garrido, M. C., Cadenas, J. M., Bueno-Crespo, A., MartÃ­nez-EspaÃ±a, R., GimÃ©nez, J. G., & Cecilia, J. M. (2022). Evaporation forecasting through interpretable data analysis techniques.Â Electronics,Â 11(4), 536.	Climate change is increasing temperatures and causing periods of water scarcity in arid and semi-arid climates. The agricultural sector is one of the most affected by these changes, having to optimise scarce water resources. An important phenomenon within the water cycle is the evaporation from water reservoirs, which implies a considerable amount of water lost during warmer periods of the year. …	.			X		24. Evaporation forecasting: This paper proposes a system for evaporation forecasting through interpretable data analysis techniques, making it relevant to the IoT-based water distribution systems category.	.
	55	A hand-held optoelectronic tongue for the identification of heavy-metal ions	Pan, Y., Liu, X., Qian, L., Cui, Y., Zheng, X., Kang, Y., ... & Wang, D. (2022). A hand-held optoelectronic tongue for the identification of heavy-metal ions.Â Sensors and Actuators B: Chemical,Â 352, 130971.	Heavy-metal ions detection conventionally relies on standard instruments that are complicated, time-consuming and constrained to laboratories. To mitigate this problem, we developed a hand-held and cost-effective smartphone-integrated analysis platform that allows fast identification of heavy-metal ions pollution caused by industrial wastewater discharge. This portable platform integrates a color…	.	X				25. Optoelectronic tongue: This paper proposes a handheld optoelectronic tongue for the identification of heavy-metal ions, making it relevant to the IoT-based water quality monitoring category.	.
	56	High-Performance Conformal Thermoelectric Generator for Environmental Monitoring	Feng, Y., Yazawa, K., & Lu, N. (2022). High-performance conformal thermoelectric generator for environmental monitoring.Â ACS Applied Electronic Materials,Â 4(1), 197-205.	A continuous underground pipeline monitoring system is needed to avoid energy waste or pipeline explosions and minimize the negative environmental impact. Thermoelectric-powered Internet of things (IoT) sensors can be a promising solution due to reliable power sources supplied by thermoelectric generators to scavenge the wasted heat through the pipeline surface. Conformal thermoelectric generator…	.				X	The paper proposes a conformal thermoelectric generator (cTEG) that can scavenge mid- to low-grade waste heat for powering IoT sensors in underground pipeline monitoring systems. Although the paper does not directly focus on water and wastewater networks management, it provides a potential solution for powering IoT sensors in water distribution systems, which falls under the category of IoT-based…	.
	57	Village 5.0: Enabling Technologies and its Applications in Development of Smart Village	Singh, K. B., Sengar, N., Das, D., & Misra, S. C. (2022, December). Village 5.0: Enabling Technologies and its Applications in Development of Smart Village. InÂ 2022 IEEE International Symposium on Smart Electronic Systems (iSES)Â (pp. 556-561). IEEE.	Rural communities struggle with illiteracy, unemployment, lack of infrastructure, transportation, medical facilities, malnutrition, basic requirements (electricity, drinking water, sanitation, and communication), geographical inaccessibility, and limited access to technology. Smart Village is a concept for rural area development that permits good education and local economic possibilities, improv…	.				X	26. Village 5.0: This paper proposes the concept of Village 5.0, which involves enabling technologies for the development of smart villages. It does not directly relate to IoT-based water or wastewater infrastructure management and is therefore categorized as not related.	.
	58	A Novel Low-Cost Approach for Detection, Classification, and Quantification of Microplastic Pollution in Freshwater Ecosystems using IoT devices and Instance Segmentation	Sundar, S. (2022, September). A Novel Low-Cost Approach For Detection, Classification, and Quantification of Microplastic Pollution in Freshwater Ecosystems using IoT devices and Instance Segmentation. InÂ 2022 IEEE MIT Undergraduate Research Technology Conference (URTC)Â (pp. 1-5). IEEE.	Microplastic pollution in freshwater is an extremely important issue, affecting numerous ecosystems and species. The lack of infrastructure for wide-scale analysis of microplastics makes it difficult for scientists and governments to develop conservation efforts. New studies concerning this topic usually involve complex and expensive processes, making them hard to scale. The objective was to deve…	.	X				27. Microplastic pollution: This paper proposes a low-cost approach for detection, classification, and quantification of microplastic pollution in freshwater ecosystems using IoT devices and instance segmentation, making it relevant to the IoT-based water quality monitoring category.	.
	59	Intrusive Energy Management with advanced smart metering and monitoring using IoT	Ramakrishnaprabu, G., Sathish, R., Devarajan, R., & Loganathan, P. (2022, September). Intrusive Energy Management with advanced smart metering and monitoring using IoT. InÂ 2022 4th International Conference on Inventive Research in Computing Applications (ICIRCA)Â (pp. 359-364). IEEE.	Smart meters and the Internet of Things (IoT) have been widely used to completely replace analogue meters in today's smart home. It converts data collecting and meter readings to digital format. This study offers a novel Intrusive Energy Management (IEM) approach for energy monitoring, with the goal of developing an activity identification system based on the Internet of Things architecture. The …	.				X	The paper discusses the use of IoT-based advanced smart metering and monitoring for energy management in smart homes. It proposes an IoT architecture for an activity identification system for appliances, which includes various layers such as perception, communication network, middleware, and application. While the paper does not directly relate to water or wastewater infrastructure management, it…	.
	60	Cybersecurity Threats and Solutions of IoT Network Layer	AlAali, A. M., AlAteeq, A., & Elmedany, W. (2022, November). Cybersecurity Threats and Solutions of IoT Network Layer. InÂ 2022 International Conference on Innovation and Intelligence for Informatics, Computing, and Technologies (3ICT)Â (pp. 250-257). IEEE.	Internet of Things (IoT) is a combination of technologies with many applications that attempt to enhance the quality of humans' life. IoT appliances gather data without human direct interaction and analyse it to be used without complexity. This advantage leads the IoT to become the main key to operate the smart city applications. Most of the large cities are involving IoT to support smart city ap…	.				X	Explanation: The paper discusses the challenges related to the network layer of IoT architecture, specifically related to cybersecurity threats and solutions. While the paper does not focus on water or wastewater networks management directly, it mentions that IoT is used in managing water and electrical services in smart cities, which makes it relevant to all categories of IoT-based water managem…	.
	61	Smart-Water: Digital Transformation of Urban Water Measurement	Sacoto-Cabrera, E. J., Castillo, I., Pauta, W., Trelles, P., TamarÃ­z, P., & GuambaÃ±a, L. (2022, November). Smart-Water: Digital Transformation of Urban Water Measurement. InÂ 2022 IEEE ANDESCONÂ (pp. 1-6). IEEE.	Digital Transformation (TD) in different industry sectors, supported by tools such as the Internet of Things (IoT), Cloud Computing, Artificial Intelligence, Big Data, Data Analysis applications, enables the development of "smart"applications and solutions to serve the needs of society. The IoT market and cloud platform development have allowed us to provide a novel alternative to improve urban w…	.	X		X		28. Smart-Water: This paper proposes a digital transformation of urban water measurement through the implementation of IoT, making it relevant to the IoT-based water quality monitoring, IoT-based water distribution systems categories.	.
	62	Maintenance 4.0 for Water Pumping Infrastructures	Tlabu, S. P., Telukdarie, A., & Mwanza, B. G. (2022, December). Maintenance 4.0 for Water Pumping Infrastructures. InÂ 2022 IEEE International Conference on Industrial Engineering and Engineering Management (IEEM)Â (pp. 0354-0358). IEEE.	Water losses and maintenance difficulties are some of the common problems faced by the current water pumping infrastructure systems globally. In South Africa, water pumping infrastructures have significant management challenges. A centralised smart digital water management system could be a solution, not only for improving the old water infrastructure but also to solve the global water crisis. Th…	.				X	Explanation: The paper proposes a centralized smart digital water management system for water pumping infrastructures using data-centric water infrastructure. It mentions the use of real-time monitoring and digitalization to improve productivity and lower operating costs. As such, it falls under the category of IoT-based water distribution systems.	.
	63	A Network Infrastructure for Monitoring Coastal Environments and Study Climate Changes in Marine Systems	Campagnaro, F., Toffolo, N., Pozzebon, A., Francescon, R., Barausse, A., Airoldi, L., & Zorzi, M. (2022, October). A Network Infrastructure for Monitoring Coastal Environments and Study Climate Changes in Marine Systems. InÂ OCEANS 2022, Hampton RoadsÂ (pp. 1-8). IEEE.	Climate changes have a tremendous impact on coastal and littoral areas, strongly affected by seaquakes and floods. Moreover, global warming causes a drastic change on the biodiversity of rivers, seas, lakes, including in biodiversity hotspots and protected areas, such as the Venice Lagoon in Italy. A similar impact is caused by pollutants: this called for a large-scale long-term action that aims …	.	X				29. Monitoring coastal environments: This paper proposes a network infrastructure for monitoring coastal environments and studying climate changes in marine systems, making it relevant to the IoT-based water quality monitoring category.	.
	64	Applications of the Internet of Things (IoT) in Real-Time Monitoring of Contaminants in the Air, Water, and Soil â€	Pamula, A. S., Ravilla, A., & Madiraju, S. V. H. (2022). Applications of the Internet of Things (IoT) in Real-Time Monitoring of Contaminants in the Air, Water, and Soil.Â Engineering Proceedings,Â 27(1), 26.	Sensor networks using the Internet of Things (IoT) are gaining momentum for real-time monitoring of the environment. Increased use of natural resources due to a rise in agriculture production, manufacturing, and civil infrastructure poses a challenge to sustainable growth and development of the global economy. For sustainable use of natural resources (including air, soil, and water), data-driven …	.				X	Explanation: The paper discusses the use of IoT for real-time monitoring of contaminants in air, water, and soil, which falls under the category of IoT-based water quality monitoring. However, the paper does not directly use IoT for wastewater management, water distribution systems, or water conservation, and therefore is not categorized under those categories. Additionally, the paper is directly…	.
	65	A Federated Learning Approach for Water Distribution Networks Monitoring	Elhachmi, J., & Kobbane, A. (2022, October). A Federated Learning Approach for Water Distribution Networks Monitoring. InÂ 2022 9th International Conference on Wireless Networks and Mobile Communications (WINCOM)Â (pp. 1-6). IEEE.	Nowadays, people's demand for water is growing as well as in public, commercial, and industrial sectors. However, the limited character for water resources presents a crucial obstacle to satisfying needs for continued human development. The control and provision of potable water are therefore the most vital challenges for the water supply system. It must use water resources in an efficient manner…	.			X		30. Federated learning for water distribution networks monitoring: This paper proposes a federated learning approach for water distribution networks monitoring, making it relevant to the IoT-based water distribution systems category.	.
	66	IoT Based Mobile Application for Monitoring of Hydroponic Vertical Farming	Kaur, G., Upadhyaya, P., & Chawla, P. (2022, October). IoT Based Mobile Application for Monitoring of Hydroponic Vertical Farming. InÂ 2022 10th International Conference on Reliability, Infocom Technologies and Optimization (Trends and Future Directions)(ICRITO)Â (pp. 1-4). IEEE.	The demand for infrastructure has tremendously increased with the population growth and it has a direct impact on the availability of agricultural land. Other factors such as climate change, declining water levels, increasing food demands, and loss of biodiversity are posing threat to agricultural production. Therefore, new agriculture techniques and practices such as vertical farming and soi-les…	.				X	I categorized this paper under "IoT-based water quality monitoring" since it discusses the design of an IoT-based mobile application that monitors the growth of plants using hydroponic vertical farming. The environmental conditions and nutritional parameters, such as temperature, humidity, TDS, pH, and water level, are recorded from the sensors and sent to the ThingSpeak cloud. Although the paper…	.
	67	Design and Implementation of an IoT-Edge Computing-based Flood Monitoring System for Early Warning: A Case of Nagaon District in Assam	Chhetri, S., & Mahamuni, C. V. (2022, October). Design and Implementation of an IoT-Edge Computing-based Flood Monitoring System for Early Warning: A Case of Nagaon District in Assam. InÂ 2022 10th International Conference on Reliability, Infocom Technologies and Optimization (Trends and Future Directions)(ICRITO)Â (pp. 1-9). IEEE.	A flood is a severe disaster affecting people around the globe, and the statistics show India is more vulnerable to floods. With a geographical area of 328.72 mha (million hectares), from which more than 40 mha is prone to flood. Floods commonly result in significant loss of life and destruction of property, infrastructure, and public utilities. As of 2022, during heavy monsoon, the northeastern …	.	X				31 - The paper presents the design and implementation of an IoT-edge computing-based flood monitoring system for early warning in the Nagaon district in Assam. This paper is related to IoT-based water quality monitoring because it focuses on monitoring the water level to provide an early warning system.	.
	68	Case Study for the Deployment of Private LPWA (Low Power Wide Area) Network in ADNOC Onshore for Remote Monitoring and Operations	Ahmed, M. S., Al Bloushi, E. Y., Al Bloushi, M. A., & Ali, A. (2022, October). Case Study for the Deployment of Private LPWA (Low Power Wide Area) Network in ADNOC Onshore for Remote Monitoring and Operations. InÂ ADIPEC. OnePetro.	Remote monitoring and operation are a key aspect in oil and gas facilities due to remoteness of producing and gathering facilities. Traditionally, SCADA system based on wired Fiber Optics or wireless radio communication is used to gather this remote data and perform supervisory actions. During last decade IoT (Internet of things) solutions are being adopted in oil and gas industries because of th…	.				X	Explanation: Since the paper is discussing the deployment of private LPWA networks in the oil and gas industry for remote monitoring and operation, it does not directly relate to any IoT-based water and wastewater networks management. Therefore, it falls under the "Not Related" category.	.
	69	Real-Time and Near-Real-Time Services in Distributed Environment for IoT â€“ Edge â€“ Cloud Computing Implementation in Agriculture and Well-Being	Goleva, R., Sokullu, R., Kadrev, V., Savov, A., Mihaylov, S., & Garcia, N. (2022, November). Real-Time and Near-Real-Time Services in Distributed Environment for IoTâ€“Edgeâ€“Cloud Computing Implementation in Agriculture and Well-Being. InÂ Computer Science and Education in Computer Science: 18th EAI International Conference, CSECS 2022, On-Site and Virtual Event, June 24-27, 2022, ProceedingsÂ (…	Well-being and agriculture works of people living not only in villages but also in towns nowadays, the healthy living environment at home, in the park, in the sports center, at work, local and remote monitoring of different parameters of the body, house, garden, the greenhouse is a matter of increased interest from families. Regardless of the size of the family, garden, villas, and fields, there …	.				X	Explanation: The paper discusses the implementation of an IoT-based network for well-being and agriculture that involves the monitoring of different parameters related to water, land, and environment management. The paper specifically mentions the need for integration with related sectors such as water management and infrastructure management. Therefore, it can be categorized as IoT-based water q…	.
	70	Electronic sensors to monitor functionality and usage trends of rural water infrastructure in Plateau State, Nigeria	Sharpe, T., Iribagiza, C., Iorkumbur, E., Coyle, J., Fenwick, C., Greggio, E., ... & Thomas, E. (2022). Electronic sensors to monitor functionality and usage trends of rural water infrastructure in Plateau State, Nigeria.Â Development Engineering,Â 7, 100100.	Internet-connected sensor technologies have recently been used to monitor water service infrastructure in remote settings. In this study, 397 groundwater pumps were observed in Plateau State, Nigeria over 12 months in 2021. Two hundred of these sites were instrumented with remotely reporting electronic sensors, including 100 hand-pump sensors, 50 electrical pump sensors, and 50 cistern water-leve…	.				X	Explanation: The paper discusses the use of electronic sensors to monitor the functionality and usage trends of rural water infrastructure in Plateau State, Nigeria. Although the study uses electronic sensors, it is not directly related to any of the provided categories. Therefore, this paper falls under the "Not Related" category.	.
	71	Sensor Cloudlet Interconnecting System for water Reservoirs Security	Palsodkar, P., Shrivastav, R., Ayangar, A., Atkare, S., Yadav, S., & Palsodkar, P. (2022, September). Sensor Cloudlet Interconnecting System for water Reservoirs Security. InÂ 2022 IEEE 10th Region 10 Humanitarian Technology Conference (R10-HTC)Â (pp. 67-70). IEEE.	DAM management systems in India are executed manually and not having any emergency control, unexpected and overcast management. Manual DAM maintenance is one of the challenging tasks due to large geological area and depth. This paper has proposed an design strategy using ESP826 node MCU based auto regulation operation cloudlet design with distinct sensors such as Ultrasonic sensors, temperature a…	.				X	32 - The paper proposes a Sensor Cloudlet Interconnecting System for Water Reservoirs Security. This paper is not related to water or wastewater infrastructure management using IoT because it does not provide any direct use of IoT in water management.	.
	72	Firefighting Robot Based On IoT and Ban Levels Technique	Rahman, A. A. A., Janin, Z., Sam, R., Masrie, M., Gunawan, T. S., & Rahman, F. D. A. (2022, September). Firefighting Robot Based On IoT and Ban Levels Technique. InÂ 2022 IEEE 8th International Conference on Smart Instrumentation, Measurement and Applications (ICSIMA)Â (pp. 138-142). IEEE.	Internet of Things (IoT) technology is known as a system where various sensors are connected to the Internet for various real-world applications. This paper presents a prototype fire fighting robot system. The system is designed and developed by implementing IoT and ban-level techniques for monitoring and control. The robot aims to eliminate human involvement and deliver an effective firefighting…	.				X	I categorized this paper under "IoT-based water quality monitoring" since it directly uses IoT to monitor and control the movement of a fire fighting robot, which aims to eliminate human involvement and deliver an effective firefighting system. The system is designed and developed by implementing IoT and ban-level techniques for monitoring and control. The robot is designed in such a way that inp…	.
	73	Anomaly Detection for a Water Treatment System Based on One-Class Neural Network	Boateng, E. A., Bruce, J. W., & Talbert, D. A. (2022). Anomaly Detection for a Water Treatment System Based on One-Class Neural Network.Â IEEE Access,Â 10, 115179-115191.	The prevalence of Internet-of-Things (IoT) technologies and the ubiquity of networked sensors and actuators in many Industrial Control Systems (ICS) have led to the exposure of critical infrastructure in our society to malicious activities and cyber threats. Programmable logic controllers (PLCs) are embedded devices that automate ICS processes. PLCs, which serve as the heart of ICS, are vulnerabl…	.				X	The paper presents a technique for anomaly detection in Industrial Control Systems (ICS), which includes water treatment systems. While the paper does not directly use IoT for water and wastewater networks management, it mentions the prevalence of IoT technologies and networked sensors in ICS. Specifically, the paper proposes an unsupervised learning approach for anomaly detection in ICS based on…	.
	74	An integrated approach for Wastewater Treatment System using IoT for green infrastructure using sensor	Sasirekha, N., Karthika, V., Tamilselvi, M., Sasirekha, D., & Paul, C. (2022, July). An integrated approach for Wastewater Treatment System using IoT for green infrastructure using sensor. InÂ 2022 International Conference on Innovative Computing, Intelligent Communication and Smart Electrical Systems (ICSES)Â (pp. 1-8). IEEE.	Wireless technology improvements have resulted in the development of new sensor properties. The recent findings in the field of sensing networks are critical as their importance grows in several application fields. Using the Internet of Things (IoT), various devices may be connected and used to exchange data. It is the major part of a city's infrastructure and is accountable for the accumulation …	.		X			33 - The paper presents an integrated approach for Wastewater Treatment System using IoT for green infrastructure using a sensor. This paper is related to IoT-based wastewater management as it provides a solution for wastewater treatment using IoT.	.
	75	Edge Computing for Critical Infrastructure Delay Sensitive Applications: Current Trends and Future Directions	Yunana, K., Oyefolahan, I. O., & Bashir, S. A. (2022, May). Edge Computing for Critical Infrastructure Delay Sensitive Applications: Current Trends and Future Directions. InÂ 2022 Applied Informatics International Conference (AiIC)Â (pp. 201-206). IEEE.	Internet of things as an emerging technology is increasing into various aspects of our lives with several smart applications ranging from grid, cities, homes and healthcare. The IOT gadgets numbering in Billions are linked to the Internet regularly with projection of the devices expected to reach 500 billion by the year 2030. Produced data by the IOT gadgets are communicated constantly from senso…	.				X	34 - The paper presents the Edge Computing for Critical Infrastructure Delay Sensitive Applications: Current Trends and Future Directions. This paper is not related to water or wastewater infrastructure management using IoT because it does not provide any direct use of IoT in water management.	.
	76	Assessment of Water Quality in Smart City Environment Leveraging ML-IoT	Ahmed, S., Mahzabin, M., Shahpar, S., Tonni, S. I., & Rahman, M. S. (2022, October). Assessment of Water Quality in Smart City Environment Leveraging ML-IoT. InÂ Proceedings of International Conference on Fourth Industrial Revolution and Beyond 2021Â (pp. 215-227). Singapore: Springer Nature Singapore.	Water quality measurement and potability for human residents are critical for health concerns in smart cities. Citizens are perplexed by data about the quality of their drinking water derived from chemical measurements. As a result, data on water potability derived from chemical sensor values must be interpreted prior to being made publicly available. This paper proposed an edge-cloud ubiquitous …	.	X				35 - The paper proposes an assessment of water quality in the smart city environment using ML-IoT. This paper is related to IoT-based water quality monitoring as it provides a solution for water quality assessment using IoT and machine learning.	.
	77	Smart IoT Biofloc Water Management System Using Decision Regression Tree	Mozumder, S. A., & Sharifuzzaman Sagar, A. S. M. (2022, October). Smart IoT biofloc water management system using decision regression tree. InÂ Proceedings of International Conference on Fourth Industrial Revolution and Beyond 2021Â (pp. 229-241). Singapore: Springer Nature Singapore.	The conventional fishing industry has several difficulties: water contamination, temperature instability, nutrition, area, expense, etc. In fish farming, Biofloc technology turns traditional farming into a sophisticated infrastructure that enables the utilization of leftover food by turning it into bacterial biomass. The purpose of our study is to propose an intelligent IoT Biofloc system that im…	.				X	36 - The paper presents a Smart IoT biofloc water management system using decision regression tree. This paper is not related to water or wastewater infrastructure management using IoT because it focuses on biofloc water management and does not use IoT in water management.	.
	78	Smart City IoT System Network Level Routing Analysis and Blockchain Security Based Implementation	Bommu, S., Babburu, K., Thalluri, L. N., Gopalan, A., Mallapati, P. K., Guha, K., & Mohammad, H. R. (2022). Smart City IoT System Network Level Routing Analysis and Blockchain Security Based Implementation.Â Journal of Electrical Engineering & Technology, 1-18.	This paper demonstrates, network-level performance analysis and implementation of smart city Internet of Things (IoT) system with Infrastructure as a Service (IaaS) level cloud computing architecture. The smart city IoT network topology performance is analyzed at the simulation level using the NS3 simulator by extracting most of the performance-deciding parameters. The performance-enhanced smart …	.			X		37 - The paper proposes a Smart City IoT System Network Level Routing Analysis and Blockchain Security-Based Implementation. This paper is related to IoT-based water distribution systems because it focuses on implementing blockchain security for smart city IoT systems, including water distribution systems.	.
	79	IoT-Enabled Water Distribution Systems - A Comparative Technological Review	Velayudhan, N. K., Pradeep, P., Rao, S. N., Devidas, A. R., & Ramesh, M. V. (2022). IoT-enabled Water Distribution Systems-A Comparative Technological Review.Â IEEE Access.	Water distribution systems are one of the critical infrastructures and major assets of the water utility in a nation. The infrastructure of the distribution systems consists of resources, treatment plants, reservoirs, distribution lines, and consumers. A sustainable water distribution network management has to take care of accessibility, quality, quantity, and reliability of water. As water is be…	.			X		38 - The paper presents a technological review of IoT-enabled water distribution systems. This paper is related to IoT-based water distribution systems as it provides a review of IoT-enabled solutions for water distribution systems.	.
	80	Cyber-Security of Industrial Internet of Things in Electric Power Systems	Sarjan, H., Ameli, A., & Ghafouri, M. (2022). Cyber-security of industrial internet of things in electric power systems.Â IEEE Access,Â 10, 92390-92409.	Electric Power Systems (EPSs) are among the most critical infrastructures of any society, since they significantly impact other infrastructures. Recently, there has been a trend toward implementing modern technologies, such as Industrial Internet of Things (IIoT), in EPSs to enhance their real-time monitoring, control, situational awareness, and intelligence. This movement, however, has exposed E…	.				X	I categorized this paper under "IoT-based water quality monitoring", "IoT-based wastewater management", and "IoT-based water conservation". Although the paper is not directly related to water and wastewater networks management, it discusses the vulnerabilities of IIoT-based applications in EPSs, including those used in water and wastewater systems. Therefore, the paper falls under the "Not Relate…	.
	81	An efficient way to vehicle movement monitor in flooded underpass using IoT	Suresh, N., Aravind, Y., Vani, B. V., & Reddy, B. N. K. (2022, May). An efficient way to vehicle movement monitor in flooded underpass using IoT. InÂ 2022 International Conference on Computational Intelligence and Sustainable Engineering Solutions (CISES)Â (pp. 223-227). IEEE.	Humans are now suffering issues because of the rapid growth of the human population. Apart from that, there is a deficiency of appropriate infrastructure in development projects, such as roads and underpasses, which results in a range of challenges, such as water logging and floods. In the event of heavy rain, underpasses and roads get immediately swamped with water, resulting in traffic gridlock…	.			X		39 - The paper proposes an efficient way to vehicle movement monitor in a flooded underpass using IoT. This paper is related to IoT-based water conservation because it proposes a solution for monitoring water flow during floods and avoiding water wastage.	.
	82	A WebGIS Prototype for Visualizing and Monitoring the Spatio-temporal Changes in Seawater Quality	Capolupo, A., Monterisi, C., Spasiano, D., Ferraro, A., Mali, M., Fratino, U., & Tarantino, E. (2022, July). A WebGIS Prototype for Visualizing and Monitoring the Spatio-temporal Changes in Seawater Quality. InÂ Computational Science and Its Applicationsâ€“ICCSA 2022 Workshops: Malaga, Spain, July 4â€“7, 2022, Proceedings, Part IIIÂ (pp. 340-353). Cham: Springer International Publishing.	Anthropogenic pressure on the coastal areas triggers a shoreline deep evolution, impacting the marine-coastal ecosystem. A specific fact-finding tool should be developed to detect the potential damages suffered by such an environment both qualitatively and quantitatively. Web Geographical Information Systems (WebGIS), developed to store, and handle geospatial big data, as well as disseminate info…	.				X	The paper is categorized as "IoT-based water quality monitoring" because it discusses the development of a WebGIS prototype for visualizing and monitoring seawater quality data in the Puglia region (Southern Italy) using Free and Open-Source Software for Geographic Information Systems. Although the paper does not directly use IoT for water and wastewater infrastructures and networks management, i…	.
	83	A Real-Time Blockchain-Based Multifunctional Integrated Smart Metering System	Mohammadi, F., Sanjari, M., & Saif, M. (2022, April). A real-time blockchain-based multifunctional integrated smart metering system. InÂ 2022 IEEE Kansas Power and Energy Conference (KPEC)Â (pp. 1-3). IEEE.	As the backbone of the smart grid, smart metering systems enable customers, as well as utility companies, to have access to real-time information on consumption patterns in electricity, gas, and water. From a technical standpoint, smart metering systems (1) reduce the need to verify electricity, gas, and water consumption services, (2) allow for efficient management of electricity, gas, and water…	.				X	40 - The paper proposes a real-time blockchain-based multifunctional integrated smart metering system. This paper is not related to water or wastewater infrastructure management using IoT because it does not provide any direct use of IoT in water management.	.
	84	An Internet of Things-Empowered Disaster Management Framework	Chekati, A., Riahi, M., & Moussa, F. (2022, July). An Internet of Things-Empowered Disaster Management Framework. InÂ Proceedings of International Conference on Computing and Communication Networks: ICCCN 2021Â (pp. 141-151). Singapore: Springer Nature Singapore.	Each year, natural disaster (floods, earthquakes, forest fires, tsunamis are only a few examples) and man-made disasters (for instance, industrial explosion, leakage in an oil pipeline or gas productions) cause damage to infrastructure, distress, financial losses, injuries, and a large death toll. However, with the help of recent technological advances, it is now vital to change from traditional …	.	X				41. Chekati et al. propose an IoT-based disaster management framework that includes water quality monitoring as one of the components. Hence, it is categorized as IoT-based water quality monitoring, and since it also includes disaster management, it falls under the Not Related category.	.
	85	A Security System for National Network	Park, W. Y., Kim, S. H., Vu, D. S., Song, C. H., Jung, H. S., & Jo, H. (2022, July). A Security System for National Network. InÂ Intelligent Computing: Proceedings of the 2022 Computing Conference, Volume 3Â (pp. 789-803). Cham: Springer International Publishing.	Recently, cybercrime attacking the national network has increased. National infrastructure such as water purification plants, power plants, and substations are operated by using programmable logic controllers (PLC). PLC controls through the Industrial Control Systems/Supervisory Control And Data Acquisition (ICS/SCADA), which receives operational commands and sends operational states by communica…	.				X	The paper discusses a security system for a national network, specifically for infrastructure such as water purification plants, power plants, and substations. While the paper does not directly address IoT-based water and wastewater management, it discusses the use of programmable logic controllers (PLC) through the Industrial Control Systems/Supervisory Control And Data Acquisition (ICS/SCADA) f…	.
	86	An Optimized Approach for Industrial IoT Based on Edge Computing	Huang, H., Dauwed, M., Derbali, M., Khan, I., Li, S., Chen, K., & Lim, S. (2022). An Optimized Approach for Industrial IoT Based on Edge Computing.Â Wireless Communications and Mobile Computing,Â 2022.	The Internet of Things (IoT) is an information network that connects gadgets and sensors to allow new autonomous tasks. The Industrial Internet of Things (IIoT) refers to the integration of IoT with industrial applications. Some vital infrastructures, such as water delivery networks, use IIoT. The scattered topology of IIoT and resource limits of edge computing provide new difficulties to traditi…	.				X	The paper proposes an optimized approach for Industrial IoT (IIoT) based on edge computing. The authors mention that water delivery networks use IIoT, which is related to water distribution systems. Additionally, the paper presents a recovery mechanism to recover edge network failure, which can be applied to both water quality monitoring and wastewater management. Moreover, the proposed approach …	.
	87	Protecting the Integrity of IoT Sensor Data and Firmware with A Feather-Light Blockchain Infrastructure	Reijsbergen, D., Maw, A., Venugopalan, S., Yang, D., Dinh, T. T. A., & Zhou, J. (2022, May). Protecting the Integrity of IoT Sensor Data and Firmware With A Feather-Light Blockchain Infrastructure. InÂ 2022 IEEE International Conference on Blockchain and Cryptocurrency (ICBC)Â (pp. 1-9). IEEE.	Smart cities deploy large numbers of sensors and collect a tremendous amount of data from them. For example, Advanced Metering Infrastructures (AMIs), which consist of physical meters that collect usage data about public utilities such as power and water, are an important building block in a smart city. In a typical sensor network, the measurement devices are connected through a computer network,…	.				X	I categorized this paper under "IoT-based water quality monitoring" because the paper discusses the use of IoT sensors in collecting data from Advanced Metering Infrastructures (AMIs) for public utilities such as water. The paper proposes a framework called Feather-Light Blockchain Infrastructure (FLBI) to protect the integrity of data collected by large-scale sensor networks and the firmware in …	.
	88	Smart Irrigation Systems: Soil Monitoring and Disease Detection for Precision Agriculture	Peddi, P., Dasgupta, A., & Gaidhane, V. H. (2022, June). Smart Irrigation Systems: Soil Monitoring and Disease Detection for Precision Agriculture. InÂ 2022 IEEE International IOT, Electronics and Mechatronics Conference (IEMTRONICS)Â (pp. 1-7). IEEE.	Smart farming is an evolving concept in the field of information and communications technology. In this, the IoT sensors and image processing is used to establish transparent mechanisms of feedback about the growth and productivity of crops and the environmental surrounding conditions. In this paper, the solution of the aforementioned problem statement in the form of an accountable live informati…	.				X	The paper focuses on the use of IoT sensors for soil monitoring and disease detection in precision agriculture. It suggests the use of an open data platform and image processing for crop health monitoring. Although the paper does not directly relate to water and wastewater networks management, it indirectly discusses the sustainable smart farming infrastructure by automating existing irrigation s…	.
	89	Systematic Review of Attribute-Based Access Control for a Smart City Using Blockchain	Mondal, G., Giri, D., & Barik, K. (2022, June). Systematic Review of Attribute-Based Access Control for a Smart City Using Blockchain. InÂ Proceedings of International Conference on Network Security and Blockchain Technology: ICNSBT 2021Â (pp. 379-390). Singapore: Springer Nature Singapore.	The research study identified that the major attributes for the smart city system were smart governance and education, quality healthcare system, smart building, smart mobility, advanced infrastructure, advanced technology, smart energy, and smart citizen. The attribute-based access control system was identified as the most effective due to governing of eight core issues of the smart city could b…	.				X	The paper discusses the use of IoT in various aspects of smart cities, including water and energy quality maintenance and supervision of the education system. Specifically, the paper mentions that IoT can be helpful in improving the service of the healthcare system, water, and energy quality maintenance, which falls under IoT-based water quality monitoring and IoT-based wastewater management. Add…	.
	90	A Novel Approach for a Smart Early Flood Detection and Awareness System using IoT	Saravanan, L., Nancy, W., Chandran, K. P., Vijayanandh, D., Arunkumar, J. R., & Prabhu, R. T. (2022, April). A Novel Approach for a Smart Early Flood Detection and Awareness System using IoT. InÂ 2022 8th International Conference on Smart Structures and Systems (ICSSS)Â (pp. 1-4). IEEE.	Floods can cause extensive demolition, resulting in loss of human and animal's life and damages to railway tracks, road transport, personal property and critical open health infrastructure. In between 1998-2021, surges influenced more than 3 billion individuals around the world. Individuals who live in floodplains or non-resistant buildings, or need caution systems and awareness of flooding risks…	.	X				42. Saravanan et al. describe a smart early flood detection and awareness system that uses IoT sensors for water level monitoring. Therefore, it is categorized as IoT-based water quality monitoring.	.
	91	Modernizing Marinas in the Mediterranean Sea using SMartY: Methodologies and Lessons learned	Akrivopoulos, O., Amaxilatis, D., Tsironis, N., Karadimas, D., Konstantopoulos, N., & Panaretou, I. (2022, March). Modernizing marinas in the Mediterranean Sea using SMartY: Methodologies and lessons learned. InÂ 2022 IEEE International Conference on Pervasive Computing and Communications Workshops and other Affiliated Events (PerCom Workshops)Â (pp. 472-477). IEEE.	Nautical Tourism market is one of the most quickly advancing markets especially in the Mediterranean Sea. At the same time, infrastructures in many marinas and ports still operate using old-school methods for booking, yacht hosting and service offerings. The Smarty solution can help marina administrators all over the world modernize their infrastructures with minimal installation and maintenance …	.				X	Based on the abstract, Paper 92 describes the use of the Smarty solution to modernize marinas and improve the quality of services offered to customers. While the solution includes IoT technology, it does not appear to be directly related to the management of water or wastewater infrastructure. Therefore, it falls under the "Not Related" category.	.
	92	Enhancement of Smart Agriculture using Internet of Things	Mehta, K., Arora, P., Arora, N., & Aayushi, A. (2022). Enhancement of Smart Agriculture Using Internet of Things.Â ECS Transactions,Â 107(1), 7047.	Internet of Things is an innovation that reprimands the fate of correspondence and registering. In present Times, Internet of things services are availed in multiple domains like Smart homes, shrewd traffic control, urban planning, Health Infrastructure and so forth. The utility domain of Internet of things is quite vast and can be actualized in diverse fields. This paper work is about the execut…	.				X	In this paper, the authors discuss the implementation of IoT in agriculture. Although the paper is not directly related to water and wastewater management, it falls under the IoT-based water conservation category as it discusses the use of IoT sensors, such as soil moisture sensors and water volume quantity measurement sensors, to optimize the use of water in farming practices. The paper also men…	.
	93	Real-Time Monitoring and Scalable Messaging of SCADA Networks Data: A Case Study on Cyber-Physical Attack Detection in Water Distribution System	Balta, S., Zavrak, S., & Eken, S. (2022, May). Real-time monitoring and scalable messaging of scada networks data: A case study on cyber-physical attack detection in water distribution system. InÂ Electrical and Computer Engineering: First International Congress, ICECENG 2022, Virtual Event, February 9â€“12, 2022, ProceedingsÂ (pp. 203-215). Cham: Springer International Publishing.	SCADA networks, which are widely used by governments around the world to run computers and applications that perform a wide range of important functions and provide critical services to their infrastructure, are becoming increasingly popular among organizations. Because of their critical role in the infrastructure, as well as the fact that they are a potential target for cyberattacks, they must b…	.				X	The paper proposes a topic-based pub/sub messaging system for real-time monitoring and detection of cyber-physical attacks in SCADA systems used in water distribution systems, which falls under the category of IoT-based water distribution systems. Additionally, the paper also discusses the use of traditional machine learning approaches used in conjunction with a deep learning encoded decoder algo…	.
	94	Real Time Smart Water Management System using IoT	Madhurima, P., Yadav, K., Gupta, R., & Jadon, J. S. (2022, March). Real Time Smart Water Management System using IoT. InÂ 2022 International Mobile and Embedded Technology Conference (MECON)Â (pp. 563-566). IEEE.	This paper describes an Internet of Things device that helps with water usage management and planning for RO filters at home. In residential complexes, this strategy is straight forward to implement. Sensors provide real-time information on the water quality. This information will be saved in the cloud. In order to provide safe and secure water, real-time water quality must be monitored. A sensor…	.	X				43. Madhurima et al. present a real-time smart water management system that uses IoT for monitoring water quality and consumption. Hence, it is categorized as IoT-based water quality monitoring and IoT-based water conservation.	.
	95	Multi-Linear LoRa network topology deployment with interference avoidance for white area monitoring	El Hadji, M. N., Diallo, O., & Hakem, N. (2022, February). Multi-Linear LoRa network topology deployment with interference avoidance for white area monitoring. InÂ 2022 IEEE Multi-conference on Natural and Engineering Sciences for Sahel's Sustainable Development (MNE3SD)Â (pp. 1-6). IEEE.	The emergence of the Internet of Things (IoT) has given a new dimension for monitoring applications due in particular to new communication technologies such as LoRa/LoRaWAN. These innovations in the technology have driven the curiosity to use LoRa-based network in applications such as smart agriculture management and monitoring system, road tracks or railways monitoring, border monitoring, Oil an…	.				X	44. El Hadji et al. propose a multi-linear LoRa network topology deployment for white area monitoring. Although it is related to environmental monitoring, it does not directly involve water or wastewater infrastructure management, so it falls under the Not Related category.	.
	96	Intelligent Forensic Investigation Using Optimal Stacked Autoencoder for Critical Industrial Infrastructures	Al-Ghamdi, A. S., Ragab, M., Alsolami, F. J., Choudhry, H., & Alzahrani, I. R. (2022). Intelligent Forensic Investigation Using Optimal Stacked Autoencoder for Critical Industrial Infrastructures.Â CMC-COMPUTERS MATERIALS & CONTINUA,Â 72(2), 2275-2289.	Industrial Control Systems (ICS) can be employed on the industrial processes in order to reduce the manual labor and handle the complicated industrial system processes as well as communicate effectively. Internet of Things (IoT) integrates numerous sets of sensors and devices via a data network enabling independent processes. The incorporation of the IoT in the industrial sector leads to the desi…	.				X	45. Al-Ghamdi et al. propose an intelligent forensic investigation approach for critical industrial infrastructures. It does not relate to IoT-based water or wastewater infrastructure management, so it falls under the Not Related category.	.
	97	Design and Installation of an IoT Electricity and Water Technological and Monitoring Solution	Escamilla-Ambrosio, P. J., Pulido-Navarro, M. G., RamÃ­rez-Salinas, M. A., Moreno-Ibarra, M. A., & Sossa-Azuela, J. H. (2022, February). Design and Installation of an IoT Electricity and Water Technological and Monitoring Solution. InÂ Smart Cities: 4th Ibero-American Congress, ICSC-Cities 2021, CancÃºn, Mexico, November 29-December 1, 2021, Revised Selected PapersÂ (pp. 297-310). Cham: Springer …	Nowadays, monitoring electricity and water usage is becoming very important to obtain consumption baselines towards establishing savings goals. Therefore, this work details the design and implementation of electricity and water monitoring networks installed to monitor electricity and water consumption at three research and academic buildings of Instituto PolitÃ©cnico Nacional. Internet of Things …	.				X	The paper discusses the design and implementation of an IoT-based solution for monitoring electricity and water usage in three research and academic buildings. While the paper does not directly focus on water quality monitoring, wastewater management, or water distribution systems, it does indirectly relate to water conservation, as the main objective of the IoT solution is to monitor electricity…	.
	98	Single Probe Imitation of Multi-Depth Capacitive Soil Moisture Sensor Using Bidirectional Recurrent Neural Network	Pal, P., Tripathi, S., & Kumar, C. (2022). Single probe imitation of multi-depth capacitive soil moisture sensor using bidirectional recurrent neural network.Â IEEE Transactions on Instrumentation and Measurement,Â 71, 1-11.	This work proposes a single probe imitation of multidepth capacitive soil moisture sensor for low-cost and energy-efficient implementation of IoT-assisted wireless sensor network (IoWSN) farm monitoring infrastructure. A conditioning circuit (CC) is devised to capture the behavior of soil water movement and its impact on soil moisture around the probe at different depths. The captured correlation…	.				X	I categorized this paper under IoT-based water quality monitoring and IoT-based water conservation. The paper proposes a low-cost and energy-efficient implementation of an IoT-assisted wireless sensor network (IoWSN) farm monitoring infrastructure for soil moisture monitoring using a single probe imitation of a multi-depth capacitive soil moisture sensor. The proposed design aims to estimate soil…	.
	99	Application of Internet of Things Technology in the Field of Environmental Engineering	Chen, Y., Tao, X., Wang, W., Liu, L., & Yuan, T. (2022). Application of Internet of Things Technology in the Field of Environmental Engineering. InÂ 2021 International Conference on Big Data Analytics for Cyber-Physical System in Smart City: Volume 1Â (pp. 1149-1156). Springer Singapore.	With the vigorous development of social economy, the environmental problems facing human beings are getting more and more serious. Land degradation, water shortage and pollution, air pollution, low quality of urban environmental infrastructure, rural environmental degradation, increasing frequency of environmental accidents, climate change and other global environmental issues. These environmenta…	.				X	The paper discusses the application of IoT technology in the field of environmental engineering, including environmental protection. While the paper does not provide specific details on the use of IoT in water and wastewater networks management, it falls under the category of IoT-based water quality monitoring, IoT-based wastewater management, IoT-based water distribution systems, and IoT-based w…	.
	100	Cybersecurity in Smart Cities: Technology and Data Security in Intelligent Transport Systems	Galego, N. M. C., & Pascoal, R. M. (2022). Cybersecurity in smart cities: Technology and data security in intelligent transport systems. InÂ Perspectives and Trends in Education and Technology: Selected Papers from ICITED 2021Â (pp. 17-33). Springer Singapore.	With the use of technologies, â€˜citiesâ€™ are able to control everything from traffic lights to the distribution of water in the city, traffic, environment, social actions, health, education, urban planning, security, and public administration, are some of the main areas of activity. The implementation of technology also brings other concerns such as data security and vulnerability and the priva…	.				X	46. Galego and Pascoal describe cybersecurity issues in smart cities, including intelligent transport systems. Since it does not involve IoT-based water or wastewater infrastructure management, it falls under the Not Related category.	.
	101	Application of Machine Learning Algorithms in Ensuring Information Security of the Internet of Things in Water Transport	Li, I., Arbuzov, A., Shilkin, V., Shilkina, I., & Baryshnikova, N. (2021, November). Application of Machine Learning Algorithms in Ensuring Information Security of the Internet of Things in Water Transport. InÂ Safety in Aviation and Space Technologies: Select Proceedings of the 9th World Congress" Aviation in the XXI Century"Â (pp. 543-557). Cham: Springer International Publishing.	IoT technologies are gaining increasing influence in all areas of human activity from wearable devices to industrial applications. With the rapid development of water transport infrastructure, as well as with the growth of commissioned port and berthing mechanisms, serious prerequisites have arisen for the use of control and monitoring tools. IoT systems allow you to flexibly and efficiently solv…	.				X	The paper discusses the application of machine learning algorithms in ensuring the information security of the Internet of Things in water transport. Although the paper does not directly focus on water and wastewater infrastructures and networks management, it discusses the use of IoT in water transport, which can include water quality monitoring. Therefore, the paper falls under the category of …	.
	102	The WEAF Mnecosystem: A Perspective of MEMS/NEMS Technologies as Pillars of Future 6G, Super-IoT and Tactile Internet	Iannacci, J. (2021, August). The WEAF mnecosystem: A perspective of MEMS/NEMS technologies as pillars of future 6G, super-IoT and tactile internet. InÂ 2021 IEEE International Conference on Smart Internet of Things (SmartIoT)Â (pp. 52-59). IEEE.	The future 6G, Super-IoT (Internet of Things) and Tactile Internet (TI) scenarios pose challenges and demand for requirements that are far beyond what the 5G â€“ today at its dawn â€“ will ever achieve. The classical approaches in designing devices, systems and infrastructures will not be suitable to build the AI-driven (Artificial Intelligence) 6G network. This work envisages a critical part for…	.				X	Although the paper does not explicitly mention water or wastewater management, it discusses the role of MEMS/NEMS technologies in building the future 6G network, Super-IoT, and Tactile Internet, which all require IoT-based water quality monitoring, wastewater management, water distribution systems, and water conservation to function effectively. Hence, the paper falls under all four IoT-based wat…	.
	103	Improvement Design of Information Processing of Urban Municipal Crossing Facilities	Liu, Y., & Peng, Y. (2022). Improvement Design of Information Processing of Urban Municipal Crossing Facilities. InÂ International Conference on Cognitive based Information Processing and Applications (CIPA 2021) Volume 2Â (pp. 71-78). Springer Singapore.	With the continuous development of my countryâ€™s information technology and the advent of the era of artificial intelligence, in the context of the continuous advancement of knowledge and technology in my country, cities have gradually evolved into an open and innovative model. In order to adapt to the development of the new technological era, the informationization of urban municipal festivals …	.				X	The paper discusses the improvement design of information processing of urban municipal crossing facilities, which includes water supply and transportation, among other things. The paper mentions the importance of the efficient operation, data sharing, interconnection, and intelligent supervision of municipal infrastructures for the construction of a modern informationized smart city. The paper i…	.
	104	Remote Reading of Water Meters as an Element of a Smart City Concept	CichoÅ„, T., & KrÃ³likowska, J. (2021). Remote Reading of Water Meters as an Element of a Smart City Concept.Â Rocznik Ochrona Åšrodowiska,Â 23.	The provisions of the European law have defined â€œSmart Meteringâ€ as a tool for remote meter readings and management of energy networks. Currently, after years of research and many real-life applications, it is one of the most popular solutions that defines friendly and modern cities. Similarly to automatic street lights, traffic signals or waste management systems, monitoring and control of w…	.			X		47. Cicho and Krlikowska present remote reading of water meters as part of the smart city concept, which involves IoT-based water distribution systems. Hence, it is categorized as IoT-based water distribution systems.	.
	105	IGiS for MANAGING CITIES SMARTLY-URBAN GEOINFORMATICS	Shah, P. (2021). IGiS FOR MANAGING CITIES SMARTLYâ€“URBAN GEOINFORMATICS.Â ISPRS Annals of Photogrammetry, Remote Sensing & Spatial Information Sciences.	A city is a geographic entity and should be efficiently analysed and optimised through the use of geo-spatial technology. The certification for a city to be Äâ‚¬ Smart' is measured on the basis of the liveable index, adequacy of water supply, assured supply of electricity, proper sanitation and solid waste management, efficient urban mobility, public transport, affordable housing, robust informa…	.			X		48. Shah presents the use of IGiS for managing cities smartly, which involves IoT-based water distribution systems. Hence, it is categorized as IoT-based water distribution systems.	.
	106	An urban sensing architecture as essential infrastructure for future cities	Kumar, V., Oikonomou, G., & Tryfonas, T. (2021, December). An urban sensing architecture as essential infrastructure for future cities. InÂ Proceedings of the 14th IEEE/ACM International Conference on Utility and Cloud Computing CompanionÂ (pp. 1-3).	Climate change and migration have become one of the most challenging problems for our civilization. In this context, city councils work hard to manage essential services for citizens such as waste collection, street lamp lighting, and water supply. Increasingly, digitalization and the Internet of Things (IoT) help cities improve services, increase productivity and reduce costs. However, to unders…	.				X	Based on the abstract, the paper discusses the implementation, management, and deployment of IoT devices for monitoring indoor and outdoor environmental conditions, energy usage, built environment, structural health monitoring, and air quality. The paper also explores the challenges faced during the implementation of IoT devices into citizens' homes and public spaces, which includes managing the …	.
	107	In-situ performance evaluation of historic box-type windows with vacuum glazing	Schuss, M., Pont, U., WÃ¶lzl, M., Schober, P., & Mahdavi, A. (2021, November). In-situ performance evaluation of historic box-type windows with vacuum glazing. InÂ Journal of Physics: Conference SeriesÂ (Vol. 2069, No. 1, p. 012128). IOP Publishing.	Climate protection objectives and energy efficiency targets imply stricter performance expectations from both new and retrofit building projects. Given the related important role of the building envelope, there is a need for a holistic approach to the design, construction, as well as laboratory and field testing of buildings' window and wall systems. In this context, the present contribution repo…	.				X	The paper discusses the implementation of IoT technology to monitor the performance of retrofit box-type windows. The monitoring infrastructure involves the deployment of regular state-of-the-art IoT technology to continuously monitor the salient performance indicators, including temperature, relative humidity, and heat flow. The values of these performance indicators can facilitate the assessmen…	.
	108	An underwater flag-like triboelectric nanogenerator for harvesting ocean current energy under extremely low velocity condition	Wang, Y., Liu, X., Chen, T., Wang, H., Zhu, C., Yu, H., ... & Xu, M. (2021). An underwater flag-like triboelectric nanogenerator for harvesting ocean current energy under extremely low velocity condition.Â Nano Energy,Â 90, 106503.	Ocean current energy harvester is a promising infrastructure to achieve self-powered marine wireless sensing system. This study proposes and investigates an underwater flag-like Triboelectric Nanogenerator (UF-TENG) based on the flow-induced vibration. The UF-TENG consists of two conductive ink-coated polyethylene terephthalate membranes and one strip of poly tetra fluoroethylene membrane with th…	.				X	This paper proposes an underwater flag-like Triboelectric Nanogenerator (UF-TENG) for harvesting ocean current energy to power sensors or micro electric appliances in the Internet of Things (IoT). Although the paper does not directly discuss water quality monitoring, wastewater management, water distribution systems, or water conservation, the UF-TENG has potential applications in IoT-based water…	.
	109	Energy efficient IoT-based cloud framework for early flood prediction	Kaur, M., Kaur, P. D., & Sood, S. K. (2021). Energy efficient IoT-based cloud framework for early flood prediction.Â Natural Hazards,Â 109, 2053-2076.	Flood is a recurrent and crucial natural phenomenon affecting almost the entire planet. It is a critical problem that causes crop destruction, destruction to the population, loss of infrastructure, and demolition of several public utilities. An effective way to deal with this is to alert the community from incoming inundation and provide ample time to evacuate and protect property. In this articl…	.	X				49. Kaur et al. propose an energy-efficient IoT-based cloud framework for early flood prediction, which involves water quality monitoring. Hence, it is categorized as IoT-based water quality monitoring and IoT-based water conservation.	.
	110	Proposal of a Big data System for an Intelligent Management of Water Resources	Bouziane, S., Aghoutane, B., Moumen, A., Sahlaoui, A., & Ouali, A. E. (2021). Proposal of a Big data System for an Intelligent Management of Water Resources. InÂ E3S Web of ConferencesÂ (Vol. 314, p. 02002). EDP Sciences.	Today, advanced technologies like Big Data, IoT, and Cloud Computing can provide new opportunities and applications in all sectors. In the water sector, water scarcity has become a common concern of different institutions and actors worldwide. In this context, several approaches and systems have been proposed and developed, using these technologies, allowing intelligent water resources management…	.			X		50. Bouziane et al. propose a big data system for intelligent water resource management, which involves water resource management and conservation. Hence, it is categorized as IoT-based water conservation.	.
	111	Performance of agro-environmental monitoring for optimum water and crop management: A case study for East Nusa Tenggara, Indonesia	Arif, C., Nugroho, B. D. A., Maftukha, R., Suryandika, F., Hapsari, U., Nihayah, B., ... & Sain, R. I. A. (2021, October). Performance of agro-environmental monitoring for optimum water and crop management: A case study for East Nusa Tenggara, Indonesia. InÂ IOP Conference Series: Earth and Environmental ScienceÂ (Vol. 871, No. 1, p. 012032). IOP Publishing.	Due to advancements in Information Technology (IT) infrastructure in Indonesia, including in remote areas, IT field monitoring is possibly used in the agriculture sector to make effective and efficient water and crop management. This study evaluates the performance of agro-environmental monitoring (AEM) in East Nusa Tenggara (NTT) Province, Indonesia. The developed technology consisting of enviro…	.	X			X	I categorized this paper under IoT-based water quality monitoring and IoT-based water conservation. The paper describes the use of agro-environmental monitoring system for effective and efficient water and crop management in agriculture, which adopts the Internet of Things (IoT) concept. The system uses environmental parameter sensors and telemetry to collect data, including soil moisture sensors…	.
	112	The Development of Smart Irrigation System with IoT, Cloud, and Big Data	Badrun, B., & Manaf, M. (2021, September). The development of smart irrigation system with IoT, cloud, and Big Data. InÂ IOP Conference Series: Earth and Environmental ScienceÂ (Vol. 830, No. 1, p. 012009). IOP Publishing.	Irrigation management in several developed countries now uses modern technology by utilizing the capacity of the Internet of Things and Big Data for leak detection, water measurement, planning, monitoring and distribution. The Internet of Things provides new solutions for the irrigation sector and helps improve irrigation management and reduce operational costs associated with maintaining infrast…	.	X				51. The paper discusses the development of a smart irrigation system using IoT, cloud, and big data for water conservation. Therefore, it falls under IoT-based water conservation category. Additionally, it mentions IoT-based water quality monitoring, which also falls under that category.	.
	113	Analyzing the adoption challenges of the internet of things (Iot) and artificial intelligence (ai) for smart cities in china	Wang, K., Zhao, Y., Gangadhari, R. K., & Li, Z. (2021). Analyzing the adoption challenges of the Internet of things (Iot) and artificial intelligence (ai) for smart cities in china.Â Sustainability,Â 13(19), 10983.	Smart cities play a vital role in the growth of a nation. In recent years, several countries have made huge investments in developing smart cities to offer sustainable living. However, there are some challenges to overcome in smart city development, such as traffic and transportation man-agement, energy and water distribution and management, air quality and waste management mon-itoring, etc. The …	.				X	52. The paper discusses analyzing the challenges of adopting IoT and AI for smart cities in China, and it does not relate directly to water or wastewater infrastructure management, thus it falls under the "Not Related" category.	.
	114	Flooding Forecasting System Based on Water Monitoring with IoT Technology	Mekruksavanich, S., Sooksomsatarn, K., & Jitpattanakul, A. (2021, August). Flooding Forecasting System Based on Water Monitoring with IoT Technology. InÂ 2021 IEEE 12th International Conference on Software Engineering and Service Science (ICSESS)Â (pp. 247-250). IEEE.	Floods are natural catastrophes that impact negatively on natural life, farming, business, and infrastructure each year. Different hydrological and climatic variables impact flooding. Several studies on flood catastrophe management and food forecasting systems have been performed. However, with the assistance of recent technology developments, it is now critical to transition from individual trac…	.	X		X		53. The paper discusses a flooding forecasting system based on water monitoring using IoT, which falls under IoT-based water quality monitoring. Additionally, the paper discusses the use of IoT-based water distribution systems, as it uses sensors to monitor water levels and flooding. Therefore, it falls under both categories.	.
	115	A survey on modern day trends in water level and quality analysis system	Revathi, N., Sengottuvelan, P., & Raja, J. T. (2021, July). A survey on modern day trends in water level and quality analysis system. InÂ Journal of Physics: Conference SeriesÂ (Vol. 1964, No. 4, p. 042078). IOP Publishing.	Our goal is to explore consistent water quality systems, the dry season, and the water quality standard structure. In fact, river water will be destroyed by a variety of hazards such as capital sewage, agricultural waste and current waste, making it unusable for anthropological practice. Employees are expected to add web water testing and submit it to the evaluation office and then conduct assess…	.	X				54. The paper surveys modern-day trends in water level and quality analysis systems, which fall under IoT-based water quality monitoring.	.
	116	A NB-IoT based platform for smart irrigation in vineyard	Liopa-Tsakalidi, A., Thomopoulos, V., Barouchas, P., Kavga, A., Boursianis, A. D., Goudos, S. K., ... & Maliatsos, K. (2021, July). A NB-IoT based platform for smart irrigation in vineyard. InÂ 2021 10th International Conference on Modern Circuits and Systems Technologies (MOCAST)Â (pp. 1-4). IEEE.	A novel prototype NB-IoT-based quasi-smart water management platform for irrigation is proposed. The prototype has been deployed in a vineyard in Peta village, Greece, as part of the AREThOU5A project. An IoT framework for regularly and accurately tracking the status of soil hydration and reporting it to a centralized entity for further processing since water needs are directly related to soil mo…	.				X	The paper proposes a NB-IoT-based platform for smart irrigation in a vineyard, which falls under the category of IoT-based water conservation since it directly uses IoT for managing water resources in agriculture. The platform utilizes IoT hardware, including low-cost microcontrollers with integrated sensor interfaces and telecommunication modems, to collect soil moisture and temperature samples …	.
	117	A distributed system for supporting smart irrigation using Internet of Things technology	Ahmed, A. A., Al Omari, S., Awal, R., Fares, A., & Chouikha, M. (2021). A distributed system for supporting smart irrigation using Internet of Things technology.Â Engineering Reports,Â 3(7).	In this paper, we present the design and implementation of a smart irrigation system using Internet of Things (IoT) technology, which can be used for automating the irrigation process in agricultural fields. It is expected that this system would create a better opportunity for farmers to irrigate their fields efficiently, as well as eliminating the field's under-watering, which could stress the p…	.				X	The paper presents a distributed system for supporting smart irrigation using IoT technology. The system is designed to automate the irrigation process in agricultural fields by monitoring soil moisture, air temperature, and other weather parameters using a low-cost Raspberry Pi device. The data is transmitted to the cloud side where the irrigation scheduling model uses it to determine when and f…	.
	118	What is smart watershed management?	Kalehhouei, M., Hazbavi, Z., Spalevic, V., Mincato, R. L., & Sestras, P. (2021). What is smart watershed management?.Â Agriculture & Forestry/Poljoprivreda i Sumarstvo,Â 67(2).	Smart management (SM) in different aspects of our planet earth is an emergence tool for today's world. Since the watershed is a basic unit for all agricultural, environmental, and socioeconomic researches and developments, so SM practicing at the watershed scale is critical. In this sense, SM in a watershed scale could be introduced as connectedness of the new Information and Communication Techno…	.			X		55. The paper discusses what smart watershed management is, which falls under IoT-based water conservation. Additionally, the paper discusses IoT-based water distribution systems and water conservation. Therefore, it falls under both categories.	.
	119	A monitoring and control system for stormwater management of urban green infrastructure	Xie, M., Wang, R., Yang, J., & Cheng, Y. (2021). A Monitoring and Control System for Stormwater Management of Urban Green Infrastructure.Â Water,Â 13(11), 1438.	Urban green infrastructure (UGI) can be used as a sustainable stormwater management approach. UGI can bring numerous ecological benefits to cities, including increased urban resilience, increased availability of water resources, and optimization of habitats. This paper used empirical research methods to describe an Internet of things (IoT)-based UGI monitoring and control system for stormwater ma…	.		X	X		56. The paper discusses a monitoring and control system for stormwater management using IoT, which falls under IoT-based water distribution systems and water conservation.	.
	120	Search and rescue operation in flooded areas: A survey on emerging sensor networking-enabled IoT-oriented technologies and applications	Hasan, M. M., Rahman, M. A., Sedigh, A., Khasanah, A. U., Asyhari, A. T., Tao, H., & Bakar, S. A. (2021). Search and rescue operation in flooded areas: A survey on emerging sensor networking-enabled IoT-oriented technologies and applications.Â Cognitive Systems Research,Â 67, 104-123.	The climate and weather dynamics in the past few years has driven a massive increase in the number and intensity of flood disasters, which severely claim casualties in human, goods and properties. Aimed to reduce these casualties, emerging software-defined internet protocol-based communication technologies in the form of Internet of Things (IoT) have attracted strong interests from disaster mitig…	.	X				57. The paper surveys emerging sensor networking-enabled IoT-oriented technologies and applications for search and rescue operations in flooded areas, which falls under IoT-based wastewater management.	.
	121	Repurposing cathodic protection systems as reliable, in-situ, ambient batteries for sensor networks	Jagtap, D., & Pannuto, P. (2021, May). Repurposing cathodic protection systems as reliable, in-situ, ambient batteries for sensor networks. InÂ Proceedings of the 20th International Conference on Information Processing in Sensor Networks (co-located with CPS-IoT Week 2021)Â (pp. 357-368).	The majority of infrastructure is susceptible to, and therefore must constantly combat, corrosion. The monitoring and maintenance of corrosion protection (or the consequences of its unchecked failure) is often one of the leading costs of infrastructure upkeep. Galvanic cathodic protection is a common corrosion control technique that is employed in applications from home appliances to boats to bri…	.				X	58. The paper discusses repurposing cathodic protection systems as reliable, in-situ, ambient batteries for sensor networks, and it does not relate directly to water or wastewater infrastructure management, thus it falls under the "Not Related" category.	.
	122	Leveraging IoT and machine learning for improved monitoring of water resources - A case study of the upper Ewaso Nyiro river	Kabi, J., & Maina, C. (2021, May). Leveraging IoT and Machine Learning for Improved Monitoring of Water Resources-A Case Study of the Upper Ewaso Nyiro River. InÂ 2021 IST-Africa Conference (IST-Africa)Â (pp. 1-8). IEEE.	This paper outlines the development of an Internet of Things (IoT) system, capable of water-level monitoring in rivers, with an aim of ensuring equitable distribution of water and sourcing of data to quantify unsustainable water usage, river catchment destruction and climate change. The paper also defines an application scenario in a specific hydrological region of the Ewaso Nyiro basin in Kenya,…	.	X				59. The paper discusses leveraging IoT and machine learning for improved monitoring of water resources, which falls under IoT-based water quality monitoring and water conservation.	.
	123	Experiments of an IoT-based wireless sensor network for flood monitoring in Colima, Mexico	Mendoza-Cano, O., Aquino-Santos, R., LÃ³pez-de la Cruz, J., Edwards, R. M., Khouakhi, A., Pattison, I., ... & Perez, I. (2021). Experiments of an IoT-based wireless sensor network for flood monitoring in Colima, Mexico.Â Journal of Hydroinformatics,Â 23(3), 385-401.	Urban flooding is one of the major issues in many parts of the world, and its management is often challenging. One of the challenges highlighted by the hydrology and related communities is the need for more open data and monitoring of floods in space and time. In this paper, we present the development phases and experiments of an Internet of Things (IoT)-based wireless sensor network for hydromet…	.	X				60. The paper discusses experiments of an IoT-based wireless sensor network for flood monitoring in Colima, Mexico, which falls under IoT-based water quality monitoring. Additionally, the paper discusses IoT-based water distribution systems, as it uses sensors to monitor water levels and flooding. Therefore, it falls under both categories.	.
	124	Global water crisis: Concept of a new interactive shower panel based on iot and cloud computing for rational water consumption	Czajkowski, A., Remiorz, L., Pawlak, S., Remiorz, E., SzyguÅ‚a, J., Marek, D., ... & Antemijczuk, O. (2021). Global water crisis: Concept of a new interactive shower panel based on IoT and cloud computing for rational water consumption.Â Applied Sciences,Â 11(9), 4081.	The present paper describes the problem and effects of water scarcity and the possibility of rational use of this resource in the idea of a Circular Economy (CE) and sustainable development. Rational water management requires innovation, due to the growing demand for this raw material. It seems that water is widely available, e.g., in Poland, there is no problem with drought. Unfortunately, Polis…	.				X	The paper proposes a solution for rational water management through an interactive shower panel that uses IoT technology to measure water consumption and provide statistics to the user. This falls under the category of IoT-based water conservation. The paper also discusses the problem of water scarcity and the need for innovation in water management, which is indirectly related to IoT-based water…	.
	125	Integrated urban water management with micro storages developed as an IoT-based solution â€“ The smart rain barrel	Oberascher, M., Kinzel, C., Kastlunger, U., Kleidorfer, M., Zingerle, C., Rauch, W., & Sitzenfrei, R. (2021). Integrated urban water management with micro storages developed as an IoT-based solutionâ€“The smart rain barrel.Â Environmental Modelling & Software,Â 139, 105028.	Low cost sensors are emerging alongside innovative data transfer technologies, allowing the integration of smart solutions for the decentralisation of water infrastructure. In this work, the smart rain barrel (SRB) concept is introduced as an IoT-based solution for advanced rainwater harvesting. The SRB consists of a rain barrel extended by a discharge valve, which is centrally controlled. This c…	.	X				61: The paper is about IoT-based water quality monitoring using smart rain barrels to manage urban water. Therefore, it falls under the category of IoT-based water quality monitoring.	.
	126	Optimisation of the resource efficiency of food manufacturing via the Internet of Things	Jagtap, S., Garcia-Garcia, G., & Rahimifard, S. (2021). Optimisation of the resource efficiency of food manufacturing via the Internet of Things.Â Computers in Industry,Â 127, 103397.	The food sector is currently very inefficient due to a large amount of food waste it generates, and the volumes of water and energy used. This problem is aggravated by increasing economic costs and stricter regulations associated with the disposal and treatment of food waste, carbon emissions and wastewater discharge. Because of this, resource efficiency is key to a sustainable food system. In th…	.				X	The paper discusses the use of an IoT-based framework for monitoring the generation of food waste and the use of energy and water in the food sector to optimize resource efficiency. Although the paper is not directly related to water and wastewater networks management, it falls under the category of IoT-based water conservation as it discusses the use of IoT to monitor and optimize water use in t…	.
	127	Industrial parameter monitoring and alarming system using IOT	Rajalakshmi, G., Delsy, T. T. M., Jamunarani, D., Amalarani, V., & Chakravarthy, P. K. S. (2021, March). Industrial Parameter Monitoring and Alarming System using IOT. InÂ Journal of Physics: Conference SeriesÂ (Vol. 1770, No. 1, p. 012033). IOP Publishing.	Today, smart grids, smart homes, smart water systems, intelligent transportation, are infrastructure systems that connect our world more than we thought possible. The common vision of such systems is usually associated with a single concept, the Internet of Things (IOT), where through the use of sensors, the entire physical infrastructure is closely related to the information e-communication tech…	.				X	The paper proposes an IoT-based system for industrial parameter monitoring and alarming, which includes the monitoring of various parameters such as production number, lighting intensity, detection of toxic gases, and ambient temperature. While the paper does not focus on water and wastewater management, it is categorized under all four categories of IoT-based water monitoring as the proposed sys…	.
	128	6g-enabled iot home environment control using fuzzy rules	WoÅºniak, M., Zielonka, A., Sikora, A., Piran, M. J., & Alamri, A. (2020). 6G-enabled IoT home environment control using fuzzy rules.Â IEEE Internet of Things Journal,Â 8(7), 5442-5452.	Technological development increases capacity of information systems, which with development of faster data transfer will be able to host variety of new devices. In this article we present electronic modules, infrastructure and fuzzy rules control model with implemented software for new generation home environment. The system is developed for the next IoT level based on 6G network communication st…	.				X	The paper proposes a control model for home environment using IoT based on 6G network communication standards. The control model is efficient in managing water flow, which falls under IoT-based water distribution systems, and carbon dioxide limitation via adaptive ventilation, which falls under IoT-based water conservation. It also mentions security aspects, which can be related to IoT-based wast…	.
	129	Narrowband IoT Based Support Functions in Smart Cities	Routray, S. K., Akanskha, E., Sharmila, K. P., Sharma, L., Ghosh, A. D., & Pappa, M. (2021, March). Narrowband IoT Based Support Functions in Smart Cities. InÂ 2021 International Conference on Artificial Intelligence and Smart Systems (ICAIS)Â (pp. 1459-1464). IEEE.	This paper shows the main supporting roles of narrowband Internet of things (NBIoT) in the smart cities. This research work will consider the cases in which there already exists some infrastructure for the smart city operations. NBIoT is used to improve the overall functions and to ease the process of resource management. Smart city initiatives are extremely popular in the developed world. In the…	.				X	The paper discusses the application of Narrowband IoT (NBIoT) in supporting various functions in smart cities, including water and electricity distribution, garbage management, and city traffic management. NBIoT can be used for water distribution systems, water quality monitoring, and water conservation. Therefore, the paper falls under all four categories related to IoT-based water management.	.
	130	A review on the Internet of Things and Big Data Analytics Based on Smart Cities	Kasubi, J. W., Manjaiah, D. H., & Demewez, G. D. (2021, March). A review on the internet of things and big data analytics based on smart cities. InÂ 2021 International Conference on Artificial Intelligence and Smart Systems (ICAIS)Â (pp. 1352-1358). IEEE.	Internet of Things (IoT) and Big Data have played a significant role in the development and sustainability of Smart Cities. They are the backbones of Smart Cities' efforts to connect human resources, social capital, and ICT infrastructure to address public challenges, achieve sustainable development and improve people's standard of life. It helps Smart Cities improve public services, such as wate…	.				X	62: The paper reviews the applications of IoT and big data analytics for smart cities in general and does not directly relate to IoT-based water or wastewater infrastructure management. Therefore, it falls under the "Not Related" category.	.
	131	Empowering Cities through Data Analytics	Kaur, P., Chaudhary, D., & Singh, J. (2021). Empowering Cities through Data Analytics.	The major objective of transforming traditional cities into smart cities is to make elementary life easier and effortless. In developing countries, the challenges of managing the development of cities when the resources are limited and are having a system of social coherence are not new. Nowadays when every city wants to transform itself into smart city elements like water management, transportat…	.				X	I categorized this paper under IoT-based wastewater management because it mentions waste management as a major area of concern and highlights the role of data analytics and IoT in finding solutions to these challenges. It also falls under IoT-based water quality monitoring because it mentions a novel design of the waste bin, which could potentially include sensors to monitor water quality. Additi…	.
	132	Challenges and new research directions to the development of smart cities: Systems-of-systems perspective	Al Mansoori, S. (2021, February). Challenges and New Research Directions to the Development of Smart Cities: Systems-of-Systems Perspective. InÂ Journal of Physics: Conference SeriesÂ (Vol. 1828, No. 1, p. 012136). IOP Publishing.	Cities play a pivotal role in the global economy as they are the hubs of trade, industry as well as social and cultural activities. Nowadays, more than 50% of the worldâ€™s population live in cities and this number is steadily rising throughout the upcoming few years leading to a highly significant change in the worldâ€™s demography. This remarkable growth in urbanization will make cities struggl…	.				X	The paper discusses the concept of smart cities and the challenges faced in implementing systems of systems to manage natural resources and assets within cities. The paper mentions that smart cities are a combination of urban systems interconnected with each other using ICT along with IoT. The shift from a single system to systems of systems would accelerate the development of various sectors inc…	.
	133	Secure Device-to-Device communications for 5G enabled Internet of Things applications	Gaba, G. S., Kumar, G., Kim, T. H., Monga, H., & Kumar, P. (2021). Secure device-to-device communications for 5g enabled internet of things applications.Â Computer Communications,Â 169, 114-128.	Smart cities are developed to optimize operations across the city such as waste and traffic management, water supply management, criminal tracking, and pollution monitoring, etc. Smart cities are formed by the interconnection of various Internet of Things (IoT) devices for collecting the data from objects and humans to perform necessary actions. But the challenge lies in the exchange of enormous …	.				X	The paper does not directly discuss any IoT-based water or wastewater infrastructure, management, or conservation, but it does talk about the challenges of exchanging enormous information in real-time, which is relevant to IoT-based water and wastewater management systems. The proposed secure and lightweight mutual authentication and key agreement protocol for WiFi Direct can be useful in securin…	.
	134	Anomaly events classification and detection system in critical industrial internet of things infrastructure using machine learning algorithms	Selim, G. E. I., Hemdan, E. E. D., Shehata, A. M., & El-Fishawy, N. A. (2021). Anomaly events classification and detection system in critical industrial internet of things infrastructure using machine learning algorithms.Â Multimedia Tools and Applications,Â 80, 12619-12640.	Industrial Control System is used in the industrial process for reducing the human factor burden and handling the complex industrial system process and communications between them efficiently. Internet of Things (IoT) is the fusion of devices and sensors by an information network to enable new and autonomous capabilities. The integration of IoT with industrial applications known as the Industrial…	.				X	The paper discusses the use of machine learning algorithms to detect anomalies, malicious activities, and cyber-attacks in critical water infrastructure that utilizes IIoT, which falls under the category of IoT-based water distribution systems and IoT-based wastewater management. Additionally, the paper discusses the integration of IoT with industrial applications, including water distribution ne…	.
	135	Capture Aware Sequential Waterfilling for LoRaWAN Adaptive Data Rate	Garlisi, D., Tinnirello, I., Bianchi, G., & Cuomo, F. (2020). Capture aware sequential waterfilling for LoRaWAN adaptive data rate.Â IEEE Transactions on Wireless Communications,Â 20(3), 2019-2033.	LoRaWAN (Long 1 Range Wide Area Network) is an attractive network infrastructure and protocol suite for ultra low power Internet of Things devices. Even if the technology itself is quite mature and specified, the currently deployed wireless resource allocation strategies are still coarse and based on rough heuristics. This paper proposes an innovative 'sequential waterfilling' strategy for assign…	.				X	The paper proposes a novel resource allocation strategy for LoRaWAN-based IoT devices, which is aimed at improving the network capacity of the system. While the paper does not directly deal with water and wastewater management or conservation, the proposed approach can be applied to water quality monitoring systems based on IoT devices. Therefore, the paper falls under the category of "IoT-based …	.
	136	Improving energy efficiency of irrigation wells by using an iot-based platform	LÃ³pez-Morales, J. A., MartÃ­nez, J. A., & Skarmeta, A. F. (2021). Improving energy efficiency of irrigation wells by using an iot-based platform.Â Electronics,Â 10(3), 250.	The irrigation sector has undergone a remarkable transformation in recent decades due to the application of pressurized water distribution technologies, improving the management of limited water resources. As a result of this transformation, irrigation has become, together with agricultural machinery, the primary consumer of energy within the agri-food sector. Furthermore, the energy cost of oper…	.				X	The paper proposes an IoT-based system for improving the energy efficiency of irrigation wells. The system monitors energy efficiency according to different parameters, such as infrastructure, energy consumption, and type of installation, to enhance each pumping operation's decision-making. Although the paper does not directly deal with water quality or distribution, it indirectly addresses water…	.
	137	Waste contamination in Water - A Real-time Water Quality Monitoring System using IoT	Kumar, G. R., Kishore, D., Kumar, G. V. M. G., Avila, J., Thenmozhi, K., Amirtharaja, R., & Praveenkumar, P. (2021, January). Waste contamination in Waterâ€”A Real-time Water Quality Monitoring System using IoT. InÂ 2021 International Conference on Computer Communication and Informatics (ICCCI)Â (pp. 1-4). IEEE.	Groundwater is one of the major sources of drinking water in most of the countries. Dumping of waste in landfill leads to the contamination of the underground water, which is termed as Leachate, which contains harmful organic and inorganic matters which makes the underground water unusable for consumption. This project proposes an IoT based water quality monitoring system and alerts the concerned…	.	X				63: The paper proposes a real-time water quality monitoring system using IoT to detect waste contamination in water, thus it falls under the category of IoT-based water quality monitoring.	.
	138	Developing IT infrastructure of evaporative irrigation by adopting IOT technology	Arif, C., Setiawan, B. I., Saptomo, S. K., Taufik, M., & Mizoguchi, M. (2021). Developing IT infrastructure of evaporative irrigation by adopting IOT technology. InÂ IOP Conference Series: Earth and Environmental ScienceÂ (Vol. 622, No. 1, p. 012048). IOP Publishing.	The primary key to the modernization of irrigation is the effectiveness of agricultural water use that should be supported by good infrastructure, including information technology (IT). The objective was to evaluate the performance of IT infrastructure in collecting weather data for evaporative irrigation. The system was set up under a natural environment since 10 July 2020 in the Kinjiro Farm, B…	.				X	The paper proposes an IT infrastructure for evaporative irrigation using IoT technology. The proposed system uses integrated sensors to collect weather data for irrigation purposes and transfers the data to a server through the console and data logger. The data is then made available to users through a dashboard system. Although the system is not directly related to water quality monitoring, wast…	.
	139	Design and Development of Smart Manhole	Praveena, B. A., Shetty, B. P., Kalasi, M. S. S., Yadav, S. S., Prasad, M., Sujith, M. N., ... & Mallikarjun, L. (2021). Design and development of smart manhole. InÂ IOP Conference Series: Materials Science and EngineeringÂ (Vol. 1013, No. 1, p. 012006). IOP Publishing.	In today's world, urban area house a majority of the population of any country. Analysis of both historical and real-time data results in an enhanced understanding of the urban infrastructures systems and consequently in an improvement in their management, By 2030 it is estimated to grow more. As urban areas are resorting to smart methods, either by IoT or by redesign of existing service sector, …	.		X			The paper 141 titled "Design and development of smart manhole" falls under the category of "IoT-based water quality monitoring". The paper presents the development of a sensor-based manhole cover that provides real-time data on the flow rate of water and concentration of toxic gases. This data is then sent to the authorized service station prior to the blockage to prevent the flooding of streets …	.
	140	On UAV-assisted data acquisition for underwater IoT in aquaculture surveillance	Wang, Q., Dai, H. N., Wang, Q., & Shukla, M. K. (2021). On UAV-assisted data acquisition for underwater IoT in aquaculture surveillance. InÂ Developments in Maritime Technology and EngineeringÂ (pp. 729-735). CRC Press.	Underwater exploration activities have grown significantly due to the proliferation of underwater Internet of Things (UIoT). Recently, UIoT can potentially be used in fishing and aquaculture for environment surveillance such as water quality and temperature monitoring. UIoT nodes are distributed in the aquaculture region to collect sensor data. However, to transmit sensor data from UIoT to remote…	.				X	The paper proposes an Unmanned Aerial Vehicles (UAVs)-assisted underwater data acquisition scheme to collect sensor data from underwater sensors for environment surveillance such as water quality and temperature monitoring in aquaculture. The paper falls under "IoT-based water quality monitoring" category as it directly uses IoT for water quality monitoring.	.
	141	A Practical Way to â€œDigital Roadmapâ€ Your Water Landscape	Winkelman, M. (2021, October). A Practical Way to'Digital Roadmap'Your Water Landscape. InÂ WEFTEC 2021. Water Environment Federation.	With the advent of new digital technologies and frameworks such as Industry 4.0, IoT, cloud, analytics, big data, machine learning, artificial intelligence, and others, along with the pressures of maintenance costs of aging infrastructure and operating costs, coupled with the current situation around COVID-19: a perfect storm has been created for the Water Industry compelling it to look at new wa…	.				X	The paper discusses the implementation of various digital technologies, including IoT, for water management in general. The paper provides a framework for water agencies to build a Digital Roadmap for their entire utility enterprise and ties in various technology aspects at multiple points. While the paper does not focus solely on IoT-based water quality monitoring, IoT-based wastewater managemen…	.
	142	How Can Machine Learning Support New Approaches to Pipe Failure Monitoring and Asset Management	Burtea, V. (2021, October). How Can Machine Learning Support New Approaches to Pipe Failure Monitoring and Asset Management. InÂ WEFTEC 2021. Water Environment Federation.	Traditionally, leak detection technologies focused on identifying real losses/leaks using water balance models. Acoustic technology using correlation and spectral analysis further advanced pipe monitoring systems to accurately pinpoint leakage locations. Recent developments in machine learning enables leak monitoring systems to deliver failure alerts in near real time. Rapid alerts offer a new va…	.			X		64: The paper discusses how machine learning can support new approaches to pipe failure monitoring and asset management, which falls under the category of IoT-based water distribution systems.	.
	143	Computing Infrastructure of IoT Applications in Smart Agriculture: A Systematical Review	Thi, M. H., Vinh, N. T. Q., & Quynh, N. T. H. (2021, November). Computing Infrastructure Of IoT Applications In Smart Agriculture: A Systematical Review. InÂ 2021 6th International Conference on Innovative Technology in Intelligent System and Industrial Applications (CITISIA)Â (pp. 1-9). IEEE.	The study reviews current computing infrastructure of Internet-of-Things based applications in smart agriculture. The purpose is to identify key areas of state-of-arts computing technologies, data architecture, network technologies, and artificial intelligence, as well as ongoing challenges in these fields. To deliver the best of our knowledge, we review the latest research published in peer-revi…	.				X	The paper discusses the computing infrastructure of IoT applications in smart agriculture, which is not directly related to water and wastewater networks management. However, it mentions the potential use of IoT in monitoring and enhancing the quality of resources such as soil and water, which falls under the category of IoT-based water quality monitoring. Therefore, we categorize this paper unde…	.
	144	An IoT and Blockchain‐based approach for the smart water management system in agriculture	Zeng, H., Dhiman, G., Sharma, A., Sharma, A., & Tselykh, A. (2021). An IoT and Blockchain‐based approach for the smart water management system in agriculture. Expert Systems, e12892.	Agriculture in rural areas facing critical issues such as irrigation with the increase in water crises followed by some other issues line seed quality, poor fertilizers and many others. The recent advances suggest that IoT and Blockchain Technology along with artificial intelligence will be most dominant technologies in near future. In this article, the integration of Internet of Things (IoT) wit…	.			X		65: The paper proposes an IoT and blockchain-based approach for smart water management in agriculture that includes IoT-based water distribution systems and water conservation, so it falls under both categories.	.
	145	An Iot and Blockchain Approach for The Smart Water Management System in Agriculture	Chang, Y., Xu, J., & Ghafoor, K. Z. (2021). An IOT and Blockchain Approach for the Smart Water Management System in Agriculture.Â Scalable Computing: Practice and Experience,Â 22(2), 105-116.	In all the smart applications, evolution of the Internet of Things (IOT) is utilized as a complete matured technology and in the future internet generations, established itself. Block-chain is also the blooming technique like Internet of things in which the distributed ledger which enhances the security contained in the each node of the block-chain. In the block-chain network, any fault transacti…	.	X				The paper describes the development of an IoT-based smart water management system in agriculture, which uses remote monitoring and 2D modeling for control and management of water. The IoT technology is used to link with the existing water management infrastructure, which makes this paper fall under the category of IoT-based water quality monitoring.	.
	146	Water Quality Monitoring System: A Smart City Application With IoT Innovation	Shanmugam, K., Rana, M. E., Xuen, D. T. Z., & Aruljodey, S. (2021, December). Water quality monitoring system: A smart city application with IoT innovation. InÂ 2021 14th International Conference on Developments in eSystems Engineering (DeSE)Â (pp. 571-576). IEEE.	In the current era of globalisation, water pollution has gradually worsened, and it has started to reach alarming heights. Water pollution has a severe impact on human health and the environment. The rationale of this research is to propose an affordable water quality monitoring system to save and conserve the quality of consumed water. Water conservation is among the most critical segments of a …	.	X				66: The paper proposes a water quality monitoring system as a smart city application with IoT innovation, so it falls under the category of IoT-based water quality monitoring.	.
	147	A Desktop Review of Security Techniques Applicable for Optimised Water Network	Namukuwa, R., Chitauro, M., & Fungai, B. S. (2021, November). A Desktop Review of Security Techniques Applicable for Optimised Water Network. InÂ 2021 3rd International Multidisciplinary Information Technology and Engineering Conference (IMITEC)Â (pp. 1-6). IEEE.	A recently published study indicated that a water supply and distribution utility industry which relies on an optimised water network should be designed with SCADA and Internet of Things (IoT) infrastructure. This is to ensure data availability and improvement of network performance for proper planning and decision making for the water utility. The designed network will be connected to the public…	.				X	67: The paper is a desktop review of security techniques applicable to optimize water networks and does not directly relate to IoT-based water or wastewater infrastructure management. Therefore, it falls under the "Not Related" category.	.
	148	Long Range Wide Area Network Deployment for Smart Metering Infrastructure in Urban Area: Case Study of Bandung City	Nashiruddin, M. I., & Nugraha, M. A. (2021, August). Long Range Wide Area Network Deployment for Smart Metering Infrastructure in Urban Area: Case Study of Bandung City. InÂ 2021 4th International Conference on Information and Communications Technology (ICOIACT)Â (pp. 221-226). IEEE.	Long Range (LoRa) technology uses less power consumption. In addition, it supports a more than two-kilometer communication range. However, several challenges need to be overcome, such as the lack of widespread Long Range Wide Area Network (LoRaWAN) in urban areas, especially for reading electricity, water, and gas meters. This research aims to study LoRaWANâ€™s network planning for Smart Metering…	.				X	The paper describes the deployment of Long Range Wide Area Network (LoRaWAN) for Smart Metering Infrastructure (SMI) in an urban area in Indonesia to read electricity, water, and gas meters. The study aims to determine the number of gateways required to support SMI device communication using commercial network simulation software. The study shows that the total number of gateways required for Ban…	.
	149	IoT Security and Safety Testing Toolkits for Water Distribution Systems	Oâ€™Toole, S., Sewell, C., & Mehrpouyan, H. (2021, December). Iot security and safety testing toolkits for water distribution systems. InÂ 2021 8th International Conference on Internet of Things: Systems, Management and Security (IOTSMS)Â (pp. 1-8). IEEE.	Due to the critical importance of Industrial Control Systems (ICS) to the operations of cities and countries, research into the security of critical infrastructure has become increasingly relevant and necessary. As a component of both the research and application sides of smart city development, accurate and precise modeling, simulation, and verification are key parts of a robust design and devel…	.			X		68: The paper proposes IoT security and safety testing toolkits for water distribution systems, which falls under the category of IoT-based water distribution systems.	.
	150	Design and Implementation of Internet of Things and Cloud Technology in Flood Risk Mitigation	Siek, M., & Larry, L. (2021, October). Design and Implementation of Internet of Things and Cloud Technology in Flood Risk Mitigation. InÂ 2021 3rd International Conference on Cybernetics and Intelligent System (ICORIS)Â (pp. 1-6). IEEE.	In the last decade, floods have frequently occurred in many big cities due land use mismanagement, and poor water management and control. With the climate change, the flood disaster becomes more intensive and frequent causing a lot of damages on public infrastructure and human casualties. The rapid development of advanced information technology has contributed on how to manage and control the flo…	.			X		69: The paper proposes the design and implementation of IoT and cloud technology in flood risk mitigation that includes IoT-based water distribution systems and water conservation, so it falls under both categories.	.
	151	A framework for asset management planning in sustainable and resilient cities	Dziedzic, R., Amador, L., An, C., Chen, Z., Eicker, U., Hammad, A., ... & Moselhi, O. (2021, October). A framework for asset management planning in sustainable and resilient cities. InÂ 2021 IEEE International Symposium on Technology and Society (ISTAS)Â (pp. 1-10). IEEE.	This paper introduces a set of strategies for facilitating sustainable and resilient asset management planning of civil infrastructure. Recent advances in research and technological development applicable to each step of the asset management process are reviewed. The focus is primarily on municipal assets including water, wastewater and drainage systems, road networks and buildings. Based on the …	.				X	70: The paper proposes a framework for asset management planning in sustainable and resilient cities and does not directly relate to IoT-based water or wastewater infrastructure management. Therefore, it falls under the "Not Related" category.	.
	152	Techno-Economic Analysis of the NB-IoT Network Planning for Smart Metering Services in Urban Area	Sultan, M. T., Nashiruddin, M. I., & Nugraha, M. A. (2021, October). Techno-Economic Analysis of the NB-IoT Network Planning for Smart Metering Services in Urban Area. InÂ 2021 8th International Conference on Electrical Engineering, Computer Science and Informatics (EECSI)Â (pp. 305-310). IEEE.	Currently, energy monitoring activities in Indonesia are still carried out manually for gas, electricity, and water. However, there is a weakness in manual monitoring; the data cannot be processed in real-time, unlike Advanced Metering Infrastructure (AMI). This study aims to prepare a techno-economic analysis of AMI's network planning using Narrow Band Internet of Things (NB-IoT) technology with…	.				X	I categorized this paper under "IoT-based water quality monitoring" because it discusses the implementation of NB-IoT technology for advanced metering infrastructure (AMI) in Padang city, Indonesia, which includes water monitoring. The paper proposes a techno-economic analysis of AMI's network planning, including water, using NB-IoT technology with its characteristics of low-frequency bands and l…	.
	153	IoT-Based real-time monitoring system for a smart energy house	Rojek, L., Islam, S., Hartmann, M., & Creutzburg, R. (2021). IoT-Based Real-Time Monitoring System for a Smart Energy House.Â Electronic Imaging,Â 2021(3), 38-1.	Monitoring Systems and the Internet of Things have become increasingly important, among others, in Renewable Energy applications. A combination of measuring sensors and actuators controlled and processed by an intelligent central system is necessary to reduce energy consumption automatically. This paper develops a modern concept for a Smart Energy House. The functionality and the hardware impleme…	.				X	The paper discusses the development of a real-time monitoring system for a smart energy house using IoT technology. The system includes various sensors that measure environmental conditions, including changes in water level and battery charging progress. Although the paper does not directly focus on water management, it mentions the use of IoT sensors to monitor water level in a self-refilling wa…	.
	154	Forensic Analysis on False Data Injection Attack on IoT Environment	Nizam, S. A. S., Ibrahim, Z. A., Rahim, F. A., Fadzil, H. S., Abdullah, H. I. M., & Mustaffa, M. Z. (2021). Forensic analysis on false data injection attack on IoT environment.Â International Journal of Advanced Computer Science and Applications,Â 12(10).	False Data Injection Attack (FDIA) is an attack that could compromise Advanced Metering Infrastructure (AMI) devices where an attacker may mislead real power consumption by falsifying meter usage from end-users smart meters. Due to the rapid development of the Internet, cyber attackers are keen on exploiting domains such as finance, metering system, defense, healthcare, governance, etc. Securing …	.				X	Based on the abstract provided, this paper does not directly use IoT for water and wastewater network management. Instead, it discusses false data injection attacks on IoT devices and their impact on advanced metering infrastructure (AMI) in domains such as finance, metering systems, defense, healthcare, governance, etc. While the topic of IoT security is relevant to water and wastewater infrastr…	.
	155	Review of in-line water quality measurement systems	Rana, D., & Kapadia, H. (2021). Review of In-line Water Quality Measurement Systems.	Water is most essential in the existence of life and hence need for monitoring its purity is ever rising. With rapid urbanization, our water networks have grown steadily, which is pushing forward the need to monitor water quality from the piping network itself to ensure safety and hygiene. Systems developed for the purpose of monitoring inline water quality, check varying parameters usually with …	.	X				Paper 71: The paper discusses in-line water quality measurement systems, which is directly related to IoT-based water quality monitoring.	.
	156	Flash flood risk management modeling in indian cities using IoT based reinforcement learning	Goyal, H. R., Ghanshala, K. K., & Sharma, S. (2021). Flash flood risk management modeling in indian cities using IoT based reinforcement learning.Â Materials Today: Proceedings,Â 46, 10533-10538.	Each year, flash floods in India have affected life, infrastructure and the economy of the country and there is a need for a systemic model of real-time flash flood management. So, to mitigate these losses, we proposed a flash flood management model focused on reinforcement learning. Based on their severity, the flash flood data is collected and rewards are distributed and this data is compared t…	.				X	Paper 72: The paper discusses flash flood risk management using IoT-based reinforcement learning. Although it deals with water management, it is not directly related to IoT-based water management, wastewater management, or water distribution systems.	.
	157	Attacklets to Test Anomaly Detectors for Critical Infrastructure	Liyakkathali, S., Sugumar, G., & Mathur, A. (2021). Attacklets to Test Anomaly Detectors for Critical Infrastructure. InÂ Applied Cryptography and Network Security Workshops: ACNS 2021 Satellite Workshops, AIBlock, AIHWS, AIoTS, CIMSS, Cloud S&P, SCI, SecMT, and SiMLA, Kamakura, Japan, June 21â€“24, 2021, ProceedingsÂ (pp. 209-227). Springer International Publishing.	Critical Infrastructure (CI), such as electric power generation and water treatment plants, are susceptible to attacks that lead the underlying physical process to deviate from its expected behaviour. Such deviations create process anomalies that may result in undesirable consequences. Anomaly detectors are installed in CI to detect process anomalies quickly and reliably. In this work, state and …	.				X	Paper 73: The paper discusses attacklets to test anomaly detectors for critical infrastructure, which is not related to IoT-based water or wastewater management.	.
	158	Low-Power DSME-Based Communication and On-Board Processing in UAV for Smart Agriculture	Choudhury, N., & Hazarika, A. (2021). Low-power dsme-based communication and on-board processing in uav for smart agriculture. InÂ Information and Communication Technology for Competitive Strategies (ICTCS 2020) Intelligent Strategies for ICTÂ (pp. 639-648). Springer Singapore.	Smart agriculture aims to provide the agricultural industry an advanced technological infrastructure that includes Internet of things (IoT), big data, cloud, robotics, unmanned aerial vehicles (UAVs, drones), and artificial intelligence (AI). It is often referred to as the Third Green revolution. Smart agriculture in rural areas can largely benefit from the low-power, low-cost sensors and UAVs to…	.				X	I put paper 161 under the categories IoT-based water quality monitoring and IoT-based water conservation. The paper discusses the use of low-power sensors and unmanned aerial vehicles (UAVs) for monitoring and controlling crops in rural areas, which falls under the scope of smart agriculture. The paper proposes a mechanism for low-latency communication using the CAP reduction feature of DSME netw…	.
	159	Development and testing of a low-cost water level sensor and a mobile based real-time flood warning system for the flash flood prone north eastern part of Bangladesh	Ahmed, N., Islam, M. S., Kalam, S., Islam, F., Chowdhury, N., Hafiz, R. S., ... & Ahmed, S. (2021). Development and Testing of a Low-Cost Water Level Sensor and a Mobile Based Real-time Flood Warning System for the Flash Flood Prone North Eastern Part of Bangladesh.Â International Journal of Sensors Wireless Communications and Control,Â 11(4), 413-427.	Background: The North-Eastern part of Bangladesh suffers from frequent flash flood, causing colossal damage to life and properties, especially the vast croplands. A distributed sensing system can monitor the water level on a continuous basis to warn people near the riverbank be-forehand and reduce the damage largely. However, the required communication infrastructure is not available in most of t…	.				X	Paper 74: The paper discusses the development of a low-cost water level sensor and a mobile-based real-time flood warning system, which is not directly related to IoT-based water or wastewater management.	.
	160	Model-based upscaling of the IoT-based smart rain barrel an integrated analysis of the urban water cycle	Oberascher, M., Kinzel, C., Rauch, W., & Sitzenfrei, R. Model-Based Upscaling of the IoT-Based Smart Rain Barrelâ€”An Integrated Analysis of the Urban Water Cycle. InÂ World Environmental and Water Resources Congress 2021Â (pp. 262-269).	The smart rain barrel (SRB) represents a micro storage developed as an IoT-based solution for advanced rainwater harvesting, consisting of a conventional rain barrel and a remote controllable discharge valve which enables novel ways of operation. To overcome the limitations of small storage volumes, high-resolution weather forecasts are used to increase detention volume, whereas ensuring a suffic…	.		X	X		Paper 75: The paper discusses model-based upscaling of the IoT-based smart rain barrel, which is directly related to IoT-based water distribution systems.	.
	161	EEWMP: An IoT-Based Energy-Efficient Water Management Platform for Smart Irrigation	Ullah, R., Abbas, A. W., Ullah, M., Khan, R. U., Khan, I. U., Aslam, N., & Aljameel, S. S. (2021). EEWMP: an IoT-based energy-efficient water management platform for smart irrigation.Â Scientific Programming,Â 2021, 1-9.	Precision agriculture is now essential in today's world, especially for countries with limited water resources, fertile land, and enormous population. Smart irrigation systems can help countries efficiently utilize fresh water and use the excess water for barren lands. Smart water management platform (SWAMP) is an IoT-based smart irrigation project designed for efficient freshwater utilization in…	.			X		Paper 76: The paper discusses an IoT-based energy-efficient water management platform for smart irrigation, which is directly related to IoT-based water distribution systems and IoT-based water conservation.	.
	162	Design of IoT-Based Smart Illumination System in Smart Cities	Mattoo, A., Saxena, K., Kumar, S., & Bagwari, N. (2021). Design of IoT-Based Smart Illumination System in Smart Cities. In Proceedings of 3rd International Conference on Computing Informatics and Networks: ICCIN 2020 (pp. 517-528). Springer Singapore.	Smart city is a livable, promising and growing concept that is responsible for keeping track of all the assets in real time. These resources are water, air, transport, electricity and solar that is based on pan-city or area-based development as per smart city proposal by the government of India. Smart cities make use of smart independent solutions to provide better hardware infrastructure and rel…	.				X	The paper discusses the design of an IoT-based smart illumination system in smart cities. While the paper does not directly focus on water and wastewater networks management, it falls under the category of IoT-based water conservation because it discusses the use of IoT to automate lighting systems, which can help in efficient management of resources and reduce energy consumption.	.
	163	A secure network scanner architecture for asset management in strongly segmented ICS networks	Niedermaier, M., Hanka, T., Fischer, F., & Merli, D. (2021). A Secure Network Scanner Architecture for Asset Management in Strongly Segmented ICS Networks. InÂ ICISSPÂ (pp. 347-355).	Industrial Control System (ICS) are essential for process automation and control in critical infrastructures, like smart grids, water distribution and also food production, in our modern world. These industrial devices will be even more connected, due to the trend of Industry 4.0 and Internet of Things (IoT), to provide additional functionality. An example for a use case is predictive maintenance…	.				X	The paper discusses the use of IoT in Industrial Control Systems (ICS), which are essential for process automation and control in critical infrastructures like water distribution. Specifically, the paper presents a secure network scanner architecture for asset management in strongly segmented ICS networks. Although the paper does not directly address water and wastewater management, it indirectly…	.
	164	Cloud-IoT Platform for Smart Irrigation Solution Based on NodeMCU	Bentabet, D. (2021). Cloud-IoT platform for smart irrigation solution based on NodeMCU. InÂ Artificial Intelligence and Renewables Towards an Energy Transition 4Â (pp. 689-696). Springer International Publishing.	Agriculture computerization by the emergence of various technical innovations like the Internet of things (IoT) and cloud computing offers a substantial opportunity to implement advanced solutions aimed at improving rural infrastructure for the benefit of smart irrigation. In particular, the combination of IoT technology and cloud computing used for agricultural applications, through the automati…	.			X		Paper 77: The paper discusses a cloud-IoT platform for a smart irrigation solution based on NodeMCU, which is directly related to IoT-based water conservation.	.
	165	Cost-effective IoT devices as trustworthy data sources for a blockchain-based water management system in precision agriculture	Pincheira, M., Vecchio, M., Giaffreda, R., & Kanhere, S. S. (2021). Cost-effective IoT devices as trustworthy data sources for a blockchain-based water management system in precision agriculture.Â Computers and Electronics in Agriculture,Â 180, 105889.	This paper explores how the energy-efficient integration of IoT-based sensing and blockchains, an innovation in the field of Digital Infrastructure technologies, can be used to incentivize virtuous behaviors in agricultural practices. The novelty of the study lies specifically in the unprecedented use of constrained sensing devices as trustworthy data sources for a permissionless blockchain. Furt…	.				X	The paper proposes the use of IoT devices for measuring water consumption and using blockchain to incentivize virtuous behaviors in agricultural practices. It directly relates to water management systems in precision agriculture, including water quality monitoring, wastewater management, and water distribution systems, so it falls under these three categories. However, the paper does not discuss …	.
	166	Framework for the implementation of an Internet of Things (IoT)-based water distribution and management system	Maroli, A. A., Narwane, V. S., Raut, R. D., & Narkhede, B. E. (2021). Framework for the implementation of an Internet of Things (IoT)-based water distribution and management system.Â Clean Technologies and Environmental Policy,Â 23, 271-283.	Abstract: This study aims to identify issues plaguing rural India's water supply chain and present a general methodology for the implementation of an IoT-based water distribution and management system in a rural setting. Through the literature review, significant hurdles in the water supply chain of rural India, as well as the potential role of IoT in water supply chain management, were recognize…	.			X		The paper discusses the implementation of an IoT-based water distribution and management system using flow meters, ultrasonic sensors, motors, etc. for rural areas in India. This falls under the category of IoT-based water distribution systems. The paper does not mention anything about water quality monitoring, wastewater management, or water conservation, so it does not fall under those categori…	.
	167	Work-in-Progress: SMART-WATER, a Îovel Î¤elemetry and Remote Control System Infrastructure for the Management of Water Consumption in Thessaloniki	Mourtzios, C., Kourtesis, D., Papadimitriou, N., Antzoulatos, G., Kouloglou, I. O., Vrochidis, S., & Ioannis, K. (2021). Work-In-Progress: SMART-WATER, a Îovel Î¤elemetry and Remote Control System Infrastructure for the Management of Water Consumption in Thessaloniki. InÂ Internet of Things, Infrastructures and Mobile Applications: Proceedings of the 13th IMCL Conference 13Â (pp. 962-970). Sprin…	Water scarcity and water stress issues pose a serious threat to the global population. Climate change, drought, population growth and consolidation in urban centres have all been increasing the pressure on water service providers to deploy more sustainable approaches in urban water management. Real-time monitoring and control of water consumption are key ingredients for a smart water management s…	.			X		Paper 78: The paper discusses SMART-WATER, a novel telemetry and remote control system infrastructure for the management of water consumption in Thessaloniki, which is directly related to IoT-based water distribution systems and IoT-based water conservation.	.
	168	Design and evaluate low-cost wireless sensor network infrastructure to monitor the jetty docking area in rural areas	Chang, J. H., Tabassum, M., Qidwai, U., Bin Abul Kashem, S., Suresh, P., & Saravanakumar, U. (2021). Design and Evaluate Low-Cost Wireless Sensor Network Infrastructure to Monitor the Jetty Docking Area in Rural Areas. InÂ Advances in Smart System Technologies: Select Proceedings of ICFSST 2019Â (pp. 689-700). Springer Singapore.	Applications of wireless communication technologies are still on the rise since its introduction, known as the Internet of things. These applications often focus on monitoring applications and real-time services. Jetty monitoring becomes one of the suitable situations to implement the Internet of things. For rural areas, implementing a jetty monitoring system can be difficult due to limitations o…	.				X	The paper describes the design and evaluation of a low-cost wireless sensor network infrastructure for monitoring the jetty docking area in rural areas. Although the paper does not directly focus on water and wastewater networks, it proposes an IoT-based system for monitoring the water level and changes in the water stream, which falls under the category of IoT-based water quality monitoring. The…	.
	169	Spectrum management of power line communications networks for industrial applications	Chehri, A., & Zimmermann, A. (2021). Spectrum management of power line communications networks for industrial applications. InÂ Human Centred Intelligent Systems: Proceedings of KES-HCIS 2020 ConferenceÂ (pp. 173-182). Springer Singapore.	Power line communications (PLC) reuse the existing power-grid infrastructure for the transmission of data signals. As power line communication technology does not require a dedicated network setup, it can be used to connect a multitude of sensors and Internet of Things (IoT) devices. Those IoT devices could be deployed in homes, streets, or industrial environments for sensing and to control relat…	.				X	The paper focuses on power line communication networks for industrial applications, and proposes a cooperative spectrum allocation algorithm to increase the spectral efficiency and improve link reliability in IoT-oriented narrowband PLC networks. Although the paper does not directly deal with water and wastewater networks management, it mentions the use of power line communication technology to c…	.
	170	Smart water distribution system based on IoT networks, a critical review	Quadar, N., Chehri, A., Jeon, G., & Ahmad, A. (2021). Smart water distribution system based on IoT networks, a critical review. InÂ Human Centred Intelligent Systems: Proceedings of KES-HCIS 2020 ConferenceÂ (pp. 293-303). Springer Singapore.	The purpose of this paper is to discuss different existing technologies related to sensing in smart cities. The continuous growth of urban areas is a reality that should be faced by innovating more solutions that are efficient. Smart cities are one of the remarkable solutions, it can be seen as different intelligent systems or platforms that work together to ensure better sustainability. Sensors …	.				X	The paper titled "Smart water distribution system based on IoT networks, a critical review" discusses the use of IoT-based water distribution systems in smart cities. The paper provides an overview of various existing technologies related to sensing in smart cities, and also presents a case study of a smart water distribution system. The paper directly uses IoT for water distribution systems and …	.
	171	Creating Global Sustainable Smart Cities (A Case Study of Masdar City)	Sankaran, V., & Chopra, A. (2020, December). Creating global sustainable smart cities (a case study of Masdar City). InÂ Journal of Physics: Conference SeriesÂ (Vol. 1706, No. 1, p. 012141). Iop Publishing.	FMany of the global cities are fast developing into resource-starved ecosystems, inefficient, unmanageable and unsustainable, owing to rising population and industrialization, adversely affecting the economic growth and quality of life, health and well-being of the communities inhabiting these cities. Furthermore, because of increasing urbanization, on the one hand, these cities are grappling wit…	.				X	In this paper, Masdar City is presented as a case study of a sustainable smart city. The city leverages information and communication technologies (ICT), including the Internet of Things (IoT), for better quality of life and performance of services. The paper specifically mentions the use of IoT in water management as one of the domains where smartness is leveraged to achieve sustainability goals…	.
	172	Feasibility Study of the IoT-Connectivity Deployment for AMI Service: A Case Study in Surabaya City	Purnama, A. A. F., Nashiruddin, M. I., & Murti, M. A. (2020, December). Feasibility Study of The IoT-Connectivity Deployment for AMI Service: A Case Study in Surabaya City. InÂ 2020 IEEE International Conference on Communication, Networks and Satellite (Comnetsat)Â (pp. 61-66). IEEE.	The manual reading of electricity, water, gas, and fuel tank meters requires increased fieldwork efficiency and improved measurement accuracy and monitoring related to service users and reducing fraud potential. The implementation of measurement services needs to be supported by communication technology, which has low cost and reliability characteristics.AMI (Advanced Meter Infrastructure) is an …	.				X	The paper (176) falls under the category of IoT-based water quality monitoring. The paper discusses the feasibility study of IoT-connectivity deployment for AMI service in Surabaya City, Indonesia. The study proposes the implementation of AMI, which is an integrated smart meter system, communication network, and data management system, for monitoring and detecting leaks to overcome losses. The st…	.
	173	Cyber security vulnerabilities of smart metering based on LPWAN wireless communication technologies	Zaraket, C., Papageorgas, P., Aillerie, M., Agavanakis, K., & Salame, C. (2020, December). Cyber security vulnerabilities of smart metering based on LPWAN wireless communication technologies. InÂ AIP Conference ProceedingsÂ (Vol. 2307, No. 1, p. 020050). AIP Publishing LLC.	Smart Metering allows utilities to get a remote and instant reading of the electronic meters used for Electricity power consumption and water utilization. Despite all the advantages presented by the smart metering system, there are always some challenges to be faced, such as security and communication. Cyber-attacks not only may threaten the consumer's privacy but they can even lead to a compromi…	.				X	I categorized this paper under all four IoT-based categories because it directly discusses the use of LPWAN technologies, specifically LoRa/LoRaWAN, for building a reliable smart metering infrastructure. The paper mentions that smart metering is used for water utilization, and discusses the challenges and vulnerabilities that come with implementing a smart metering system using LPWAN technology. …	.
	174	A Scalable and Dependable Data Analytics Platform for Water Infrastructure Monitoring	Lorenz, F., Geldenhuys, M., Sommer, H., Jakobs, F., LÃ¼ring, C., Skwarek, V., ... & Thamsen, L. (2020, December). A scalable and dependable data analytics platform for water infrastructure monitoring. InÂ 2020 IEEE International Conference on Big Data (Big Data)Â (pp. 3488-3493). IEEE.	With weather becoming more extreme both in terms of longer dry periods and more severe rain events, municipal water networks are increasingly under pressure. The effects include damages to the pipes, flash floods on the streets and combined sewer overflows. Retrofitting underground infrastructure is very expensive, thus water infrastructure operators are increasingly looking to deploy IoT solutio…	.		X	X		Paper 79: The paper discusses a scalable and dependable data analytics platform for water infrastructure monitoring, which is directly related to IoT-based water distribution systems.	.
	175	A system to retrofit existing infrastructure to be smart and IoT ready	Ravi, D., Honnavalli, P. B., & Vijay, C. N. (2020, December). A system to retrofit existing infrastructure to be smart and IoT ready. In Proceedings of the 2020 4th International Conference on Vision, Image and Signal Processing (pp. 1-6).	With this paper, the aim was to establish an ecosystem where an existing infrastructure could be retrofitted with the smart technologies and various appliances in a house could communicate with each other. This enables the existing infrastructure consisting of fans, lights and devices like refrigerator, geysers and air-conditioners to be communication ready with upcoming technologies. The project…	.				X	The paper proposes a system to retrofit existing infrastructure to be smart and IoT-ready. The system includes various functionalities such as building secure mechanisms, temperature monitoring and control system, monitoring water levels in tanks, and controlling valves and gas leakage. The paper directly uses IoT for water distribution systems, water quality monitoring, wastewater management, an…	.
	176	Towards a Secure and Scalable IoT Infrastructure: A Pilot Deployment for a Smart Water Monitoring System	Overmars, A., & Venkatraman, S. (2020). Towards a secure and scalable iot infrastructure: A pilot deployment for a smart water monitoring system.Â Technologies,Â 8(4), 50.	Recent growth in the Internet of Things (IoT) looks promising for realizing a smart environment of the future. However, concerns about the security of IoT devices are escalating as they are inherently constrained by limited resources, heterogeneity, and lack of standard security controls or protocols. Due to their inability to support state-of-the-art secure network protocols and defense mechanis…	.			X		Paper 80: The paper discusses a pilot deployment for a smart water monitoring system towards a secure and scalable IoT infrastructure, which is directly related to IoT-based water distribution systems and IoT-based water conservation.	.
	177	Towards green smart cities: Importance of Urban forestry and urban vegetation	UÃ§ar, Z., Akay, A. E., & Bilici, E. (2020). Towards green smart cities: importance of urban forestry and urban vegetation.Â International Archives of the Photogrammetry, Remote Sensing and Spatial Information Sciences-ISPRS Archives.	More than half of the total world's population lives in urban areas, and it is expected that 66% of all them will live in urban areas by 2050. The population growth and continuing urbanization in the world cause many social, economic, technical, and organizational problems related to transportation, businesses, communication networks, services, and utilities that can risk the cities' economic and…	.				X	81. The paper discusses the importance of urban forestry and vegetation for green smart cities, which is not directly related to IoT-based water or wastewater infrastructure management. Thus, it falls under the "Not Related" category.	.
	178	IoT Infrastructure for Environmental Monitoring: A Case at Tasik Chini Biosphere Reserve	Zakaria, M. S., Nordin, R., & Ruslan, M. S. (2020, November). IoT Infrastructure for Environmental Monitoring: A Case at Tasik Chini Biosphere Reserve. InÂ 2020 IEEE Conference on e-Learning, e-Management and e-Services (IC3e)Â (pp. 43-48). IEEE.	Lake Chini UNESCO Biosphere Reserve is a unique lentic ecosystem which is home to a rich and diverse biodiversity of flora and fauna. It must be conserved, preserved and protected to ensure all resources with economic values are protected and being managed well. Ensuring healthy water quality is vital for the survival of this ecosystem. Lake Chini Research Center has been monitoring the climate, …	.	X				82. The paper proposes an IoT infrastructure for environmental monitoring at Tasik Chini Biosphere Reserve, which is related to IoT-based water quality monitoring. Therefore, it falls under the "IoT-based water quality monitoring" category.	.
	179	New developments and challenges of cucumber production in western and northern European countries	VÃ¤nninen, I. (2019, June). New developments and challenges of cucumber production in western and northern European countries. InÂ VI International Symposium on Cucurbits 1294Â (pp. 35-52).	The volume of cucumbers and gherkins in the EU market is no longer growing, but there have been considerable shifts in the consumption and production trends in several countries during the last 10 years. Within the EU, geographical location of cucumber firms determines production infrastructure and need of heating, cooling and lighting energy, while variable demand, producer and export/import pri…	.				X	Explanation: The paper is not directly related to water and wastewater infrastructure and network management using IoT. Therefore, it falls under the "Not Related" category.	.
	180	Towards a High-Fidelity Network Emulation of IEC 104 SCADA Systems	Salazar, L., Ortiz, N., Qin, X., & Cardenas, A. A. (2020, November). Towards a high-fidelity network emulation of IEC 104 SCADA systems. InÂ Proceedings of the 2020 Joint Workshop on CPS&IoT Security and PrivacyÂ (pp. 3-12).	With the rise of malware targeting industrial control systems, researchers need more tools to develop a better understanding of the networks under attack, the potential behavior of malware, and design possible defenses. One of the most important protocols used in practice today is IEC 104, which is used to monitor and control the Power Grid of several countries, as well as to monitor and control …	.				X	83. The paper proposes a network emulation of IEC 104 SCADA systems, which is not directly related to IoT-based water or wastewater infrastructure management. Thus, it falls under the "Not Related" category.	.
	181	Catch Me if You Can: An In-Depth Study of CVE Discovery Time and Inconsistencies for Managing Risks in Critical Infrastructures	Thomas, R. J., Gardiner, J., Chothia, T., Samanis, E., Perrett, J., & Rashid, A. (2020, November). Catch me if you can: An in-depth study of CVE discovery time and inconsistencies for managing risks in critical infrastructures. InÂ Proceedings of the 2020 Joint Workshop on CPS&IoT Security and PrivacyÂ (pp. 49-60).	Industrial Control Systems (ICS) are central to the operation of critical national infrastructure (CNI) such as oil and gas, water treatment, power generation and transport systems. Effective risk management to mitigate large-scale disruption to societies and economies depends on both timely information about vulnerabilities and the consistency of this information. The longer the vulnerabilities …	.				X	The paper focuses on the analysis of vulnerabilities in Siemens Industrial Control Systems (ICS) devices, which are widely used in various critical infrastructure including water treatment systems. However, the paper does not directly use IoT for water and wastewater networks management, hence it does not fall under any of the first four categories. Therefore, it is categorized as "Not Related" t…	.
	182	Designing community-based intelligent systems for water infrastructure resilience	Venkatasubramanian, N., Davis, C. A., & Eguchi, R. T. (2020, November). Designing community-based intelligent systems for water infrastructure resilience. InÂ Proceedings of the 3rd ACM SIGSPATIAL International Workshop on Advances in Resilient and Intelligent CitiesÂ (pp. 62-65).	In this paper, we discuss how data-driven approaches using emerging IoT and machine learning based analytics can revolutionize the resilience and efficiency of urban water systems. Key challenges in creating a next generation water infrastructure includes issues of how and where to place instruments to gather a wide variety of information useful for improving operational efficiencies and for dama…	.			X		84. The paper proposes a community-based intelligent system for water infrastructure resilience, which is related to IoT-based water distribution systems. Therefore, it falls under the "IoT-based water distribution systems" category.	.
	183	Toward A Sustainable Cyber-Physical System Architecture for Urban Water Supply Systemâˆ—âˆ—This work was supported by KLIMAFORSK programme(No. 244147/E10) from Research Council of Norway.	Wu, D., Wang, H., & Seidu, R. (2020, November). Toward A Sustainable Cyber-Physical System Architecture for Urban Water Supply System. InÂ 2020 International Conferences on Internet of Things (iThings) and IEEE Green Computing and Communications (GreenCom) and IEEE Cyber, Physical and Social Computing (CPSCom) and IEEE Smart Data (SmartData) and IEEE Congress on Cybermatics (Cybermatics)Â (pp. 48…	The growth of urbanization has induced tremendous difficulties for fundamental resources, environment, and city management. Miscellaneous traditional infrastructures cannot keep up with the increasing requirements of residents. Among them, the urban water supply system (UWSS), as the foothold of all modern life, plays a key point in sustainable city development. To address these challenges, we in…	.		X	X		85. The paper proposes a sustainable cyber-physical system architecture for urban water supply systems, which is related to IoT-based wastewater management and IoT-based water distribution systems. Therefore, it falls under both "IoT-based wastewater management" and "IoT-based water distribution systems" categories.	.
	184	Informal urbanism and the Internet of Things: Reliability, trust and the reconfiguration of infrastructure	Chambers, J., & Evans, J. (2020). Informal urbanism and the Internet of Things: Reliability, trust and the reconfiguration of infrastructure.Â Urban Studies,Â 57(14), 2918-2935.	Of the build out of humanity predicted up to the end of the century, a substantial portion will occur within informal urban settlements â€“ areas characterised by poor access to infrastructure and services. There is a pressing need to better understand how and with what implications the growing proliferation of Internet of Things (IoT) technologies, as a component of smart urbanism, are being app…	.				X	86. The paper discusses the reliability, trust, and reconfiguration of infrastructure in the context of informal urbanism and the Internet of Things. It does not directly relate to IoT-based water or wastewater infrastructure management. Thus, it falls under the "Not Related" category.	.
	185	Cerberus: A Novel Alerting System for Flood, Fire, and Air Quality	Dasari, S. (2020, October). Cerberus: A Novel Alerting System for Flood, Fire, and Air Quality. InÂ 2020 IEEE Eurasia Conference on IOT, Communication and Engineering (ECICE)Â (pp. 98-101). IEEE.	According to the NHTSA, an average of 384 fatalities occur annually in the United States due to drowning while driving. The California wildfires in 2017 caused a property loss of 13 billion, 46 lives, and injuries to hundreds more. Most of the current alerting mechanisms are expensive and deficient in features for detecting floods at road crossings, wildfires, and air quality. The current fire al…	.				X	87. The paper proposes a novel alerting system for flood, fire, and air quality, which is not directly related to IoT-based water or wastewater infrastructure management. Thus, it falls under the "Not Related" category.	.
	186	Design and Prototyping of a Scalable IoT Solution Based on LoRaWAN to Improve the Service of School Routes in the South West Location of Barranquilla	Hernandez, L., Marquez, L., Correa, S., & Simanca, T. (2020, October). Design and Prototyping of a Scalable IoT Solution Based on LoRaWAN to Improve the Service of School Routes in the South West Location of Barranquilla. InÂ 2020 6th International Conference on Science in Information Technology (ICSITech)Â (pp. 17-22). IEEE.	The Internet of things (IoT) has quickly been introduced into wireless networks and systems, opening several possibilities in terms of connectivity. IoT arises from the vast need to monitor, manage, and configure 'things' remotely. Different industrial or residential applications can use IoT to obtain or send data, such as remote control of alarms, water meters, simple traffic, and light points. …	.				X	The paper proposes a LoRaWAN-based IoT solution to improve school transport services in Barranquilla. Although the paper is not directly related to water and wastewater networks management, it falls under the IoT-based water quality monitoring category because the proposed IoT solution can monitor various variables in real-time, such as the percentage of occupation and arrivals and departures tim…	.
	187	PV System Monitoring by IoT in Smart University	Zaerov, E., Letskovska, S., Seymenliyski, K., & Simionov, R. (2020, October). PV System Monitoring by IoT in Smart University. InÂ Proceedings of the 9th International Conference on Telecommunications and Remote SensingÂ (pp. 44-49).	The proposed paper is mainly aimed at passing the collected data from smart devices to a server to build a smarter university. The idea is to create the so-called Smart University. The smart university infrastructure includes two main components: IT infrastructure and intelligent engineeringsystems. Smart engineering systems include power supply systems, water supply, air conditioning, fire prote…	.				X	The paper does not directly deal with water or wastewater infrastructures, but it discusses using IoT for monitoring and managing various engineering systems at a university, including power supply systems, water supply, and air conditioning. Therefore, it falls under all four categories of IoT-based water quality monitoring, IoT-based wastewater management, IoT-based water distribution systems, …	.
	188	Role of IoT and its adoption in smart farming	Chavali, L. N., Kishore, P. B., & Narayana, P. L. (2020). Role of IoT and its adoption in smart farming.Â CURRENT TRENDS IN BIOTECHNOLOGY AND PHARMACY,Â 14(4), 439-447.	Despite the agricultural debts and loans are waived/or written off by various Govt, the access to institutional loan are limited especially to small and marginal farmers thereby forcing them to depend on money lender and agents. The share of farm income, which made up 74 per cent of rural incomes in the 1970s, has dropped to 30 per cent in 2010. Non-farm growth has been substantial in rural India…	.				X	The paper talks about the role of IoT in agriculture, specifically in enhancing agricultural economy. Although the paper does not directly relate to water and wastewater infrastructures, it mentions the potential use of IoT in water conservation and water quality monitoring in agriculture. Therefore, it falls under the categories of IoT-based water quality monitoring and IoT-based water conservat…	.
	189	River pollution control system through efficient monitoring of industrial effluent discharge	Devi, R. L., Saravanan, G., & Shankar, R. (2020). River Pollution Control System through Efficient Monitoring of Industrial Effluent Discharge.	The textile and dyeing industries are providing opportunities for sustained economic development in a country and also they play a major role in Indian economy. Water pollution is one of the major issues pertaining to the destruction. The river and its associated living organisms are directly affected by chemical effluent discharge in it. So as to ensure the nature of the water provided for vario…	.		X			88. The paper proposes a river pollution control system through efficient monitoring of industrial effluent discharge, which is related to IoT-based wastewater management. Therefore, it falls under the "IoT-based wastewater management" category.	.
	190	Optimizing Global Navigation Satellite Systems network real-time kinematic infrastructure for homogeneous positioning performance from the perspective of tropospheric effects: Optimizing GNSS network infrastructure	Yu, C., Penna, N. T., & Li, Z. (2020). Optimizing Global Navigation Satellite Systems network real-time kinematic infrastructure for homogeneous positioning performance from the perspective of tropospheric effects.Â Proceedings of the Royal Society A,Â 476(2242), 20200248.	Real-time centimetre-level precise positioning from Global Navigation Satellite Systems (GNSS) is critical for activities including landslide, glacier and coastal erosion monitoring, flood modelling, precision agriculture, intelligent transport systems, autonomous vehicles and the Internet of Things. This may be achieved via the real-time kinematic (RTK) GNSS approach, which uses a single receive…	.				X	The paper focuses on optimizing the design of CORS ground infrastructure for achieving precise positioning from Global Navigation Satellite Systems (GNSS), and it does not discuss or use IoT-based systems for water or wastewater management. Therefore, it falls under the "Not Related" category. However, the paper does mention the potential applications of precise positioning, including the Interne…	.
	191	Real-time dissolved oxygen monitoring based on the internet of smart farming platform	Wasana, B., Oluseye, A., Juthamas, J., & Kanlaya, R. (2020). Real-time dissolved oxygen monitoring based o the internet of smart farming platform.Â Journal of Theoretical and Applied Information Technology,Â 98(19), 3183-3192.	The Internet of Things (IoT) has not only become a part of human life, it has become a tool being made important, especially in the 21st century for generating revenue and strengthening communitiesâ€™ economies. Smart farming on the other hand, is a management concept that is aimed at providing the agricultural industry with a system or infrastructure to leverage on advanced technology such as th…	.	X				89. The paper proposes a real-time dissolved oxygen monitoring system based on the Internet of Smart Farming platform, which is related to IoT-based water quality monitoring. Therefore, it falls under the "IoT-based water quality monitoring" category.	.
	192	Disruptive technologies in smart cities: A survey on current trends and challenges	Radu, L. D. (2020). Disruptive technologies in smart cities: a survey on current trends and challenges.Â Smart Cities,Â 3(3), 1022-1038.	This paper aims to explore the most important disruptive technologies in the development of the smart city. Every smart city is a dynamic and complex system that attracts an increasing number of people in search of the benefits of urbanisation. According to the United Nations, 68% of the world population will be living in cities by 2050. This creates challenges related to limited resources and in…	.				X	The paper discusses the role of disruptive technologies, including the Internet of Things, in the development of smart cities. Although the paper does not focus specifically on water and wastewater networks management, it does mention that these technologies can be applied to key sectors such as energy, water, and transportation systems in cities. Therefore, the paper is relevant to all four cate…	.
	193	Advisory Framework to Interconnect Distributed Water Bodies Targeting Agriculture Farms	Sunil, J. S., Prasad, R. V., & Venkataraman, H. (2020, September). Advisory framework to interconnect distributed water bodies targeting agriculture farms. InÂ 2020 10th International Conference on Advanced Computer Information Technologies (ACIT)Â (pp. 863-866). IEEE.	There has been several instances of uneven distribution of water resources in villages, towns and cities of developing countries of South-east Asia, such as India, Indonesia, etc. Interconnection of distributed water bodies such that excess water from one water source to other deficit source of a stressed agriculture farm is always a challenge. Planning and implementation of efficient laying in a…	.			X		90. The paper proposes an advisory framework to interconnect distributed water bodies targeting agriculture farms, which is related to IoT-based water distribution systems and IoT-based water conservation. Therefore, it falls under both "IoT-based water distribution systems" and "IoT-based water conservation" categories.	.
	194	Key performance indicators for Smart Campus and Microgrid	Alrashed, S. (2020). Key performance indicators for Smart Campus and Microgrid.Â Sustainable cities and society,Â 60, 102264.	Attempts have been made to enhance the smartness of a campus from various perspectives such as obtaining real-time statistics on reduction in energy consummation, increased percentage of power generation from renewable resources, improved campus traffic flow, air quality, and monitoring buildings health etc. However, to the best of our knowledge a comprehensive list of Key Performance Indicators …	.				X	The paper proposes Key Performance Indicators (KPIs) for a smart campus and microgrid, which includes water resource management. The KPIs proposed in the paper are measurable, achievable, relevant, and time phased, and they cover different service areas, including water conservation. Although the paper does not directly use IoT for water and wastewater networks management, it proposes the need fo…	.
	195	SMART WATER GRID: AN IoT FRAMEWORK	Saravanan, D., Agrawal, A., & Indragandhi, V. (2020, August). Smart Water Grid: AN IoT Framework. InÂ IOP Conference Series: Materials Science and EngineeringÂ (Vol. 906, No. 1, p. 012022). IOP Publishing.	Water scarcity became most inexorable problem these days. In urban areas most of the people live in flats or apartments where, they need to get water from the corporation and then they ought to supply for each flat and apartment. Supplying water in a normal way arises many technical issues. In this paper, a working prototype is implemented to solve these problems. This model contains one Main wat…	.				X	I categorized this paper as IoT-based water quality monitoring and IoT-based water distribution systems. The paper proposes a prototype model for a smart water grid that uses IoT to monitor and control the water levels in different tanks. The model can function automatically based on water levels or other problems, and it can also be controlled manually from an Android app. The paper does not dis…	.
	196	Healthcare critical infrastructure stochastic interdependencies simulation model for smart cities: Flood disaster scenario	Nukavarapu, N., & Durbha, S. (2020). Healthcare Critical Infrastructure Stochastic Interdependencies Simulation Model for Smart Cities: Flood Disaster Scenario.Â ISPRS Annals of the Photogrammetry, Remote Sensing and Spatial Information Sciences,Â 4, 123-129.	Healthcare Critical Infrastructure (HCI) is not an independent network; the operation of a healthcare facility depends on many other Critical Infrastructure (CI) networks such as electric supply CI, water supply CI, etc., forming an interdependent CI network. During a flooding disaster event, as the flood levels rise, the interdependent HCI network becomes vulnerable. A failure in one of the CI r…	.	X				Paper 91: The paper presents a healthcare critical infrastructure stochastic interdependencies simulation model for smart cities that includes flood disaster scenarios. The model uses IoT-based water quality monitoring to monitor the water quality during the flood disaster.	.
	197	Understanding sensor cities: Insights from technology giant company driven smart urbanism practices	Dâ€™Amico, G., Lâ€™Abbate, P., Liao, W., Yigitcanlar, T., & Ioppolo, G. (2020). Understanding sensor cities: Insights from technology giant company driven smart urbanism practices.Â Sensors,Â 20(16), 4391.	The data-driven approach to sustainable urban development is becoming increasingly popular among the cities across the world. This is due to citiesâ€™ attention in supporting smart and sustainable urbanism practices. In an era of digitalization of urban services and processes, which is upon us, platform urbanism is becoming a fundamental tool to support smart urban governance, and helping in the …	.				X	Based on the abstract you provided, the paper "Understanding sensor cities: Insights from technology giant company driven smart urbanism practices" by D'Amico et al. falls under the "Not Related" category. While the paper discusses the use of sensors and big data analysis technologies in optimizing urban infrastructures and services such as water, waste, and energy, it does not directly focus on …	.
	198	Internet of Things (IoT) integrated data center infrastructure monitoring system	Ramphela, M. K. J., Owolawi, P. A., Mapayi, T., & Aiyetoro, G. (2020, August). Internet of things (iot) integrated data center infrastructure monitoring system. InÂ 2020 International Conference on Artificial Intelligence, Big Data, Computing and Data Communication Systems (icABCD)Â (pp. 1-6). IEEE.	â€”The evolution of data center technology across the globe has created a paradigm shift in the implementation of network and data infrastructure in modern day networks. This new technology will only be fully utilized if adequately monitored, hence the need for an effective data center infrastructure monitoring system. An appropriate monitoring system should be able to monitor both the data cente…	.				X	Based on the abstract of the paper, it does not directly use IoT for water and wastewater infrastructures and networks management. Therefore, it falls under the "Not Related" category. The paper discusses the need for an integrated data center infrastructure monitoring system and proposes a design approach that includes sensors for monitoring variables such as temperature, humidity, location, mot…	.
	199	Design and implementation of a pressure monitoring system based on iot for water supply networks	PÃ©rez-Padillo, J., GarcÃ­a Morillo, J., Ramirez-Faz, J., Torres RoldÃ¡n, M., & Montesinos, P. (2020). Design and implementation of a pressure monitoring system based on IoT for water supply networks.Â Sensors,Â 20(15), 4247.	Increasing the efficiency of water supply networks is essential in arid and semi-arid regions to ensure the supply of drinking water to the inhabitants. The cost of renovating these systems is high. However, customized management models can facilitate the maintenance and rehabilitation of hydraulic infrastructures by optimizing the use of resources. The implementation of current Internet of Thing…	.			X		Paper 92: The paper proposes a pressure monitoring system based on IoT for water supply networks. The system is designed to monitor the water distribution systems.	.
	200	Hands-on Lab on Smart City Vulnerability Exploitation	Gomez, A., Shahriar, H., Clincy, V., & Shalan, A. (2020, July). Hands-on lab on smart city vulnerability exploitation. InÂ 2020 IEEE 44th Annual Computers, Software, and Applications Conference (COMPSAC)Â (pp. 1777-1782). IEEE.	In recent years, security has been a major concern to everyone. Some devices like energy meters, health appliances have been a life changing technology for smart city. These devices have assisted in connecting several different services and in turn have made life better for people living in smart city. Other services such as emergency responder, water system, disaster management, sanitation and i…	.				X	The paper discusses the security vulnerabilities associated with IoT devices in a smart city, and provides an example of hacking a CCTV camera. While the paper does not directly focus on IoT-based water and wastewater networks management, it discusses the integration of various services, including water system and infrastructure. Therefore, it falls under the categories of IoT-based water quality…	.
	201	Sigfox-based internet of things network planning for advanced metering infrastructure services in urban scenario	Purnama, A. A. F., & Nashiruddin, M. I. (2020, July). Sigfox-based internet of things network planning for advanced metering infrastructure services in urban scenario. InÂ 2020 IEEE International Conference on Industry 4.0, Artificial Intelligence, and Communications Technology (IAICT)Â (pp. 15-20). IEEE.	SigFox is a Low Power Wide Area Network (LPWAN) technology using unlicensed frequency bands with Ultra Narrow Band technology. It has advantages in terms of very low power consumption, high receiver sensitivity, and the cheap cost of end devices. SigFox technology is based on Link Quality Control (LQI). One parameter is the division of zones is based on radio configuration, where Indonesia includ…	.				X	I categorized paper 205 under "IoT-based water quality monitoring" because the paper discusses the use of SigFox, an IoT technology, for advanced metering infrastructure services which includes monitoring water usage. The paper does not directly discuss wastewater management, water distribution systems, or water conservation, so those categories do not apply.	.
	202	Optimal Sampling of Water Distribution Network Dynamics Using Graph Fourier Transform	Wei, Z., Pagani, A., Fu, G., Guymer, I., Chen, W., McCann, J., & Guo, W. (2019). Optimal sampling of water distribution network dynamics using graph fourier transform.Â IEEE Transactions on Network Science and Engineering,Â 7(3), 1570-1582.	Water distribution networks are critical infrastructures under threat from the accidental or intentional release of contaminants. Large-scale data collection is vital for digital twin modelling, but remains challenging in underground spaces over vast areas. Therefore, inferring the contaminant spread process with minimal sensor data is important. Existing sensor deployment optimisation approaches…	.				X	This paper proposes a novel data-driven Graph Fourier Transform that exploits the low-rank property of networked dynamics to optimally sample water distribution networks (WDNs). The proposed method can be used for monitoring applications of WDNs and can be applied to a variety of infrastructure sensing for digital twin modelling. Although the paper did not directly focus on IoT-based water qualit…	.
	203	IoT monitoring of urban tree ecosystem services: Possibilities and challenges	Matasov, V., Belelli Marchesini, L., Yaroslavtsev, A., Sala, G., Fareeva, O., Seregin, I., ... & Valentini, R. (2020). IoT monitoring of urban tree ecosystem services: Possibilities and challenges.Â Forests,Â 11(7), 775.	Urban green infrastructure plays an increasingly significant role in sustainable urban development planning as it provides important regulating and cultural ecosystem services. Monitoring of such dynamic and complex systems requires technological solutions which provide easy data collection, processing, and utilization at affordable costs. To meet these challenges a pilot study was conducted usin…	.				X	We categorized paper 207 as "Indirectly related" to all four categories of IoT-based water and wastewater management because it describes a pilot study that uses IoT technology to monitor the ecophysiological parameters of trees in a green area in Moscow. The study aimed to quantify indicators of ecosystem services related to climate, air quality, and water regulation, which could potentially inc…	.
	204	Effective IoT-Facilitated Storm Surge Flood Modeling Based on Deep Reinforcement Learning	Wang, Y., Chen, X., Wang, L., & Min, G. (2020). Effective IoT-facilitated storm surge flood modeling based on deep reinforcement learning.Â IEEE Internet of Things Journal,Â 7(7), 6338-6347.	Storm surge hazard annually costs hundreds of lives and billions of dollars for damages in coastal countries. Simulating the storm surge events and alerting flood areas in advance is essential to guarantee the safety of citizens and urban infrastructure. However, due to the complexity of the urban environment, the accuracy of simulation faces challenges. By leveraging the facility of the Internet…	.				X	Paper 93: The paper proposes an effective IoT-facilitated storm surge flood modeling based on deep reinforcement learning. Although the paper is related to flooding, it does not directly use IoT for water or wastewater infrastructure management.	.
	205	Research on the Development of Marine Regional E-Commerce Based on the Analysis of Cloud Computing and Grey Prediction Method	Zhang, Z., Sun, W., & Yu, Y. (2020). Research on the development of marine regional E-commerce based on the analysis of cloud computing and grey prediction method.Â Journal of Coastal Research,Â 115(SI), 333-337.	Zhang, Z.Z.; Sun, W., and Yu, Y.L., 2020. Research on the development of marine regional e-commerce based on the analysis of cloud computing and grey prediction method. In: Bai, X. and Zhou, H. (eds.), Advances in Water Resources, Environmental Protection, and Sustainable Development. Journal of Coastal Research, Special Issue No. 115, pp. 333-337. Coconut Creek (Florida), ISSN 0749-0208. China's…	.				X	The paper does not directly relate to water or wastewater management, distribution, or conservation, but it does discuss the development of e-commerce in marine areas based on cloud computing and big data technology, which falls under the "Not Related" category. However, the paper does mention the use of IoT in monitoring water quality in marine areas, which puts it in the "IoT-based water qualit…	.
	206	An advanced learning-based multiple model control supervisor for pumping stations in a smart water distribution system	Predescu, A., TruicÄƒ, C. O., Apostol, E. S., Mocanu, M., & Lupu, C. (2020). An advanced learning-based multiple model control supervisor for pumping stations in a smart water distribution system.Â Mathematics,Â 8(6), 887.	Water distribution is fundamental to modern society, and there are many associated challenges in the context of large metropolitan areas. A multi-domain approach is required for designing modern solutions for the existing infrastructure, including control and monitoring systems, data science and Machine Learning. Considering the large scale water distribution networks in metropolitan areas, machi…	.			X		Paper 94: The paper proposes an advanced learning-based multiple model control supervisor for pumping stations in a smart water distribution system.	.
	207	On connectivity of UAV-assisted data acquisition for underwater internet of things	Wang, Q., Dai, H. N., Wang, Q., Shukla, M. K., Zhang, W., & Soares, C. G. (2020). On connectivity of uav-assisted data acquisition for underwater internet of things.Â IEEE Internet of Things Journal,Â 7(6), 5371-5385.	Underwater exploration activities have grown significantly due to the proliferation of underwater Internet of Things (UIoT). However, to transmit sensor data from UIoT to remote onshore data processing center requires a huge cost of deploying and maintaining communication infrastructures. In this article, we propose an unmanned aerial vehicles (UAVs)-assisted underwater data acquisition scheme by…	.				X	Paper 211 proposes a scheme for UAV-assisted underwater data acquisition for UIoT. The proposed scheme does not directly use IoT for water and wastewater networks management. Therefore, it is not related to any of the four categories provided (IoT-based water quality monitoring, IoT-based wastewater management, IoT-based water distribution systems, and IoT-based water conservation). However, the …	.
	208	Quantifying the computational efficiency of compressive sensing in smart water network infrastructures	Tzagkarakis, G., Charalampidis, P., Roubakis, S., Makrogiannakis, A., & Tsakalides, P. (2020). Quantifying the computational efficiency of compressive sensing in smart water network infrastructures.Â Sensors,Â 20(11), 3299.	Monitoring contemporary water distribution networks (WDN) relies increasingly on smart metering technologies and wireless sensor network infrastructures. Smart meters and sensor nodes are deployed to capture and transfer information from the WDN to a control center for further analysis. Due to difficulties in accessing the water assets, many water utility companies employ battery-powered nodes, w…	.			X		Paper 95: The paper quantifies the computational efficiency of compressive sensing in smart water network infrastructures. The paper is related to water distribution systems.	.
	209	Smart Infrastructure: A Vision for the Role of the Civil Engineering Profession in Smart Cities	Berglund, E. Z., Monroe, J. G., Ahmed, I., Noghabaei, M., Do, J., Pesantez, J. E., ... & Levis, J. (2020). Smart infrastructure: a vision for the role of the civil engineering profession in smart cities.Â Journal of Infrastructure Systems,Â 26(2), 03120001.	Smart city programs provide a range of technologies that can be applied to solve infrastructure problems associated with ageing infrastructure and increasing demands. The potential for infrastructure and urban improvement remains unrealized, however, due to technical, financial, and social constraints and criticisms that limit the implementation of smart cities concepts for infrastructure managem…	.				X	The paper discusses the potential of smart technologies, including the Internet of Things, for infrastructure management across civil engineering domains, including water systems. While the paper does not directly discuss the implementation of IoT-based systems for water and wastewater management, it does provide a vision for the role of the civil engineering profession in developing smart infras…	.
	210	Here there be dragons, a pre-roadmap construct for IoT service infrastructure	Islam, N., Marinakis, Y., Majadillas, M. A., Fink, M., & Walsh, S. T. (2020). Here there be dragons, a pre-roadmap construct for IoT service infrastructure.Â Technological Forecasting and Social Change,Â 155, 119073.	The major challenges facing the 21st century world demands disruptive technology based solutions. One of the most promising exponential technology set to address world challenges is the Internet of Things (IoT) based Trillion Sensor System (TSS). The IoT supports many revolutionary commercial and societal solutions including wearable or unobtrusive medical sensors, Industry 4.0, power and water g…	.				X	The paper discusses the Internet of Things (IoT) and its potential to transform various sectors, including water and power grids, smart cities, and transportation. Although the paper does not focus on IoT-based water and wastewater networks management directly, it is related to the development of IoT infrastructure and its potential to address the world's challenges. Therefore, we placed it in al…	.
	211	Cultural Infrastructure and the Planning of Future Cities	Sindhu, S., & Reshmi, M. K. (2020). Cultural Infrastructure and the Planning of Future Cities. InÂ E3S Web of ConferencesÂ (Vol. 170, p. 05001). EDP Sciences.	Culture is an important aspect of human civilization. Preserving and giving value to the cultural heritage of a region can pave the way for local as well as regional development. This includes tangible, intangible and the natural heritage of cities. It is necessary to develop a cultural infrastructure plan along with other aspects such as transportation, built, green and grey in frastructure. Cul…	.				X	the paper is discussing the importance of cultural infrastructure in the planning of future cities and how it can be integrated into the city planning process of Indian cities. Although the paper mentions the use of Information and Communication Technology (ICT) and Internet of Things (IoT) in smart cities for the management of water services, waste disposal, and energy, it does not directly use …	.
	212	Redefining smartness in township with Internet of Things & Artificial Intelligence: Dholera city	Bang, R., Patel, M., Garg, V., Kasa, V., Malhotra, J., & Sarode, S. (2020). Redefining smartness in township with Internet of Things & Artificial Intelligence: Dholera city. InÂ E3S Web of ConferencesÂ (Vol. 170, p. 06001). EDP Sciences.	Internet of Things (IoT) with Artificial Intelligence (AI) has the virtue to address the key challenges encountered by the excessive Urban population; contributing to water management, waste management, energy crisis, and many such affairs. The urban city has reached the level of water scarcity with no adequate water supply. The lack of interconnectivity within the city also leads to severe conse…	.			X		Paper 96: The paper discusses redefining smartness in township with IoT and artificial intelligence, focusing on water conservation and smart water distribution systems.	.
	213	Application of advanced learning methods for detecting network configuration in a smart water distribution system	Predescu, A., Mocanu, M., & Lupu, C. (2020, May). Application of advanced learning methods for detecting network configuration in a smart water distribution system. InÂ 2020 IEEE International Conference on Automation, Quality and Testing, Robotics (AQTR)Â (pp. 1-6). IEEE.	Water distribution is one of the main pillars of modern society and accounts for a constant need of innovative solutions to age-old problems. There are many challenges associated to the aging infrastructure in large metropolitan areas as well as efficient operation of control structures, requiring improved decision support systems and autonomous operation based on available data. An extension of …	.			X		Paper 97: The paper proposes an application of advanced learning methods for detecting network configuration in a smart water distribution system.	.
	214	A LoRaWAN network infrastructure for the remote monitoring of offshore sea farms	Parri, L., Parrino, S., Peruzzi, G., & Pozzebon, A. (2020, May). A LoRaWAN network infrastructure for the remote monitoring of offshore sea farms. InÂ 2020 IEEE International Instrumentation and Measurement Technology Conference (I2MTC)Â (pp. 1-6). IEEE.	Fish farming is nowadays a crucial sector for food industry all around the world. While the total amount of captured fish production has remained almost constant in the last 30 years (around 90 millions tonnes according to the Food and Agriculture Organization (FAO) of the United States), in the same span of time the quantity of bred fish has increased tenfold, almost reaching the quantity of the…	.				X	The paper discusses the implementation of a real-time monitoring infrastructure for offshore sea farms using IoT technologies, specifically the use of LoRaWAN network infrastructure for data transmission. The proposed architecture allows for remote, real-time control of offshore sea farms and includes the measurement of several parameters about the quality of water in the fish cages as well as th…	.
	215	Participatory Sensing and Digital Twin City: Updating Virtual City Models for Enhanced Risk-Informed Decision-Making	Ham, Y., & Kim, J. (2020). Participatory sensing and digital twin city: Updating virtual city models for enhanced risk-informed decision-making.Â Journal of Management in Engineering,Â 36(3), 04020005.	The benefits of a digital twin city have been assessed based on real-time data collected from preinstalled Internet of Things (IoT) sensors (e.g., traffic, energy use, air pollution, water quality) for managing the complex systems of cities, but the sensor-based reality information is likely insufficient to provide dynamic spatiotemporal information about physical vulnerabilities. Understanding c…	.				X	Paper 220 proposes a framework for creating a digital twin city using participatory sensing and IoT sensors for updating virtual city models to support risk-informed decision-making in managing city infrastructure in extreme weather events. The paper mentions the use of IoT sensors for monitoring water quality, among other things. Therefore, the paper falls under the "IoT-based water quality moni…	.
	216	A secure fog-based platform for SCADA-based IoT critical infrastructure	Baker, T., Asim, M., MacDermott, Ã., Iqbal, F., Kamoun, F., Shah, B., ... & Hammoudeh, M. (2020). A secure fogâ€based platform for SCADAâ€based IoT critical infrastructure.Â Software: Practice and Experience,Â 50(5), 503-518.	The rapid proliferation of Internet of things (IoT) devices, such as smart meters and water valves, into industrial critical infrastructures and control systems has put stringent performance and scalability requirements on modern Supervisory Control and Data Acquisition (SCADA) systems. While cloud computing has enabled modern SCADA systems to cope with the increasing amount of data generated by …	.				X	The paper proposes a secure fog-based platform for SCADA-based IoT critical infrastructure. While the paper does not directly address water and wastewater infrastructures, it does mention the use of IoT devices such as smart meters and water valves in these infrastructures. Therefore, we can categorize this paper under all four categories related to IoT-based water infrastructures.	.
	217	Crytojacking Classification based on Machine Learning Algorithm	Mansor, W. N. A. B. W., Ahmad, A., Zainudin, W. S., Saudi, M. M., & Kama, M. N. (2020, April). Crytojacking Classification based on Machine Learning Algorithm. InÂ Proceedings of the 2020 8th International Conference on Communications and Broadband NetworkingÂ (pp. 73-76).	The rise of cryptocurrency has resulted in a number of concerns. A new threat known as cryptojacking" has entered the picture where cryptojacking malware is the trend for future cyber criminals, who infect computers, install cryptocurrency miners, and use stolen information from victim databases to set up wallets for illicit funds transfers. Worst by 2020, researchers estimate there will be 30 bi…	.				X	The paper is not directly related to IoT-based water and wastewater networks management, but it mentions the vulnerability of IoT devices to cyber attacks, which can affect various industries including water, power, and energy industries. However, since the paper does not discuss any IoT-based solutions or applications for water and wastewater networks, it falls under the "Not Related" category.	.
	218	The potential of integrating blockchain technology into smart sustainable city development	Wong, P. F., Chia, F. C., Kiu, M. S., & Lou, E. C. W. (2020, March). The potential of integrating blockchain technology into smart sustainable city development. InÂ IOP Conference Series: Earth and Environmental ScienceÂ (Vol. 463, No. 1, p. 012020). IOP Publishing.	The rise of global urbanisation has led to massive pressures on resources such as food, water, infrastructure, and energy demand to support growing populations. It brings adverse impacts on the liveable condition and economic growth of a country if this problem remains unsolved. Smart city is a potential solution to address the challenges of urbanisation by leveraging the technological breakthrou…	.				X	The paper discusses the integration of blockchain technology into smart sustainable city development, specifically in the context of smart city management. While the paper does not directly address IoT-based water and wastewater networks management, it does highlight the potential of integrating blockchain technology into various aspects of smart city development, including smart governance, smar…	.
	219	No-frills water comfort for developing regions	Abbas, S., Ehsan, A., Ahmed, S., Khan, S. A., Jadoon, T. M., & Alizai, M. H. (2020, April). No-frills water comfort for developing regions. InÂ 2020 19th ACM/IEEE International Conference on Information Processing in Sensor Networks (IPSN)Â (pp. 61-72). IEEE.	In developing countries, majority of the households use overhead water tanks to have running water in their taps. These water tanks are exposed to the elements, which usually render the tap water uncomfortable to use, given the extreme subtropical weather conditions. Externally weatherproofing these tanks to maintain the groundwater temperature is short-lived, and only results in a marginal (0.5 …	.				X	The paper proposes "Ashray," an IoT-based intelligent system to minimize the exposure of water to the elements, thereby maintaining its temperature close to that of groundwater. This falls under the category of "IoT-based water conservation." The paper does not address water quality monitoring, wastewater management, or water distribution systems. Thus, it is not related to those categories.	.
	220	Building a Text Messaging-Based System to Support Low-Cost Automation in Household Agriculture	Lizana, F., Tello, R., GaitÃ¡n, M. G., Ruete, D., & GÃ³mez-Pantoja, C. (2020, April). Building a Text Messaging-Based System to Support Low-Cost Automation in Household Agriculture. InÂ 2020 Congreso Estudiantil de ElectrÃ³nica y Electricidad (INGELECTRA)Â (pp. 1-5). IEEE.	Home garden crops, small-scale agricultural systems for local food production, are becoming an integral part of the food supply chain in a number of developing countries and peri-urban areas of some developed regions. In this work, we propose a low-cost, monitoring and irrigation system which can be applied in household and local community gardens. The basic architecture consists of a sensing/act…	.				X	I categorized this paper under "IoT-based water conservation" and "IoT-based water quality monitoring." The paper proposes a low-cost monitoring and irrigation system for household and community gardens using commercial off-the-shelf hardware and a mobile application. The system uses legacy text-messaging service as a mechanism to support alert and control operations for monitoring and irrigation…	.
	221	European legislation and incentives programmes for demand Side management	de FÃ¡tima Castro, M., Colclough, S., Machado, B., Andrade, J., & BraganÃ§a, L. (2020). European legislation and incentives programmes for demand Side management.Â Solar Energy,Â 200, 114-124.	Energy is now intrinsically linked to technological development, given it powers all such systems. The use of fossil fuels to supply the required energy is causing global environmental and health issues and is impacting on all life forms on the planet. Given increasing energy consumption, anthropogenic greenhouse gas emissions are consequentially increasing. Therefore, it is necessary to replace …	.				X	The paper discusses the use of IoT in the management of water resources to achieve sustainable solutions. It mentions the importance of smart grids and the Internet of Things in providing more information to stakeholders. However, it does not provide any specific examples of IoT-based water or wastewater management solutions. Therefore, it is categorized as "IoT-based water quality monitoring", "…	.
	222	(t,n): Sensor Stipulation with THAM Index for Smart Agriculture Decision-Making IoT System	Mekala, M. S., & Viswanathan, P. (2020). (t, n): Sensor Stipulation with THAM index for smart agriculture decision-making IoT system.Â Wireless Personal Communications,Â 111(3), 1909-1940.	The rapid growth of industrial infrastructure creates ecological issues such as climate change. Field indecisiveness affects agricultural yields due to improper measurement, field assessment, selection of sensors and deployment of sensors. The accurate prediction of changes in weather parameters, field assessment and soil parameters, has become an outstanding challenge for the agricultural IoT. T…	.				X	The paper proposes a sensor selection mechanism and a THAM index for a smart decision-making system for agriculture. Although the paper does not directly relate to water and wastewater infrastructures and networks management, it indirectly relates to IoT-based water quality monitoring and IoT-based water conservation as it suggests the use of sensors to measure soil temperature, humidity, and air…	.
	223	ALISI: A lightweight identification system based on Iroha	Bernieri, G., Conti, M., Sovilla, M., & Turrin, F. (2020, March). ALISI: a lightweight identification system based on Iroha. InÂ Proceedings of the 35th Annual ACM Symposium on Applied ComputingÂ (pp. 271-273).	Given their ubiquity, modern Internet of Things (IoT) devices represent a dangerous attack surface for hackers. These devices are strongly heterogeneous by manufacturer, application field, geographic area of deployment, security requirements, and computational performances. This vulnerability problem is more important in the Industrial Internet of Things (IIoT) scenario, where systems are critica…	.				X	The paper presents an IoT-based lightweight identification system for IoT and IIoT systems using blockchain technology. While the paper does not focus on water or wastewater networks, it mentions the vulnerability of critical systems such as water distribution in the IIoT scenario. Therefore, it falls under the category of IoT-based water quality monitoring, IoT-based wastewater management, IoT-b…	.
	224	Development of a spatial decision support system for real-time flood early warning in the Vu Gia-Thu Bon river basin, Quang Nam Province, Vietnam	Nguyen, H. T., Duong, T. Q., Nguyen, L. D., Vo, T. Q., Tran, N. T., Dang, P. D., ... & Nguyen, L. K. (2020). Development of a spatial decision support system for real-time flood early warning in the Vu Gia-Thu Bon river basin, Quang Nam Province, Vietnam.Â sensors,Â 20(6), 1667.	Vu Gia-Thu Bon (VGTB) river basin is an area where flash flood and heavy flood events occur frequently, negatively impacting the local community and socio-economic development of Quang Nam Province. In recent years, structural and nonâ€“structural solutions have been implemented to mitigate damages due to floods. However, under the impact of climate change, natural disasters continue to happen un…	.				X	Paper 98: The paper proposes a spatial decision support system for real-time flood early warning. Although the paper is related to flooding, it does not directly use IoT for water or wastewater infrastructure management.	.
	225	An Efficient Tracking System for Air and Sound Pollution using IoT	Cornelius, K., Kumar, N. K., Pradhan, S., Patel, P., & Vinay, N. (2020, March). An efficient tracking system for air and sound pollution using IoT. InÂ 2020 6th International conference on advanced computing and communication systems (ICACCS)Â (pp. 22-25). IEEE.	The growth of pollution is broadening day by day with certain factors that affect the environment and result in the loss of biological degradation. This could be due to rapid industrialization and urbanization. It is directly affecting the health of the people in one way or another and results in the degradation of the population. It is very important to examine the air quality as well as the sou…	.				X	The paper discusses the design of an IoT-based air and sound pollution monitoring system to identify the presence of dangerous gases and compounds in the environment. While the paper does not directly address water and wastewater networks management, it can be categorized as IoT-based water quality monitoring as the same IoT technology can be utilized for water quality monitoring. It can also be …	.
	226	A smartwater metering deployment based on the fog computing paradigm	Amaxilatis, D., Chatzigiannakis, I., Tselios, C., Tsironis, N., Niakas, N., & Papadogeorgos, S. (2020). A smart water metering deployment based on the fog computing paradigm.Â Applied Sciences,Â 10(6), 1965.	In this paper, we look into smart water metering infrastructures that enable continuous, on-demand and bidirectional data exchange between metering devices, water flow equipment, utilities and end-users. We focus on the design, development and deployment of such infrastructures as part of larger, smart city, infrastructures. Until now, such critical smart city infrastructures have been developed …	.				X	The paper falls under the "IoT-based water quality monitoring" category. The paper discusses the design, development, and deployment of smart water metering infrastructures using the fog computing paradigm, which enables continuous, on-demand, and bidirectional data exchange between metering devices, water flow equipment, utilities, and end-users. The paper highlights how the fog computing paradi…	.
	227	APAD: Autoencoder-based Payload Anomaly Detection for industrial IoE	Kim, S., Jo, W., & Shon, T. (2020). APAD: Autoencoder-based payload anomaly detection for industrial IoE.Â Applied Soft Computing,Â 88, 106017.	The Internet of Things era is being replaced by the Internet of Everything (IoE) era, where everything can communicate with everything else. With the advent of the fourth industrial revolution and the IoE era, industrial control systems (ICSs) are transitioning into industrial IoE (IIoE). The ICS, which is no longer a closed network, suffers from various cybersecurity threats. Since the attack of…	.				X	The paper proposes an autoencoder-based payload anomaly detection method for industrial IoE, which is not directly related to water or wastewater management. However, the proposed method can be applied to various fields, including water and wastewater management. Therefore, it falls under all four categories of IoT-based water quality monitoring, IoT-based wastewater management, IoT-based water d…	.
	228	Digital transformation of mining enterprises contributes to the rational use of resources	Shvedina, S. A. (2020). Digital transformation of mining enterprises contributes to the rational use of resources. InÂ IOP Conference Series: Earth and Environmental ScienceÂ (Vol. 408, No. 1, p. 012064). IOP Publishing.	Today, the digitalization of industrial enterprises means the use of the latest technologies: robotic or remotely controlled equipment, visualization of technological processes in inaccessible areas, remote centralized control rooms, high-precision positioning of drilling rigs and excavators, portable devices for monitoring the health status of personnel, electronic shift-based risk cards of work…	.				X	The paper does not directly mention water or wastewater management, distribution, or conservation. However, it discusses the digital transformation of mining enterprises and proposes the use of IoT technologies to improve the efficiency of production and business processes. Since the paper mentions the use of IoT technology, it can be categorized under all four IoT-based water-related categories.	.
	229	Integrating redundancy, diversity, and hardening to improve security of industrial internet of things	Laszka, A., Abbas, W., Vorobeychik, Y., & Koutsoukos, X. (2020). Integrating redundancy, diversity, and hardening to improve security of industrial internet of things.Â Cyber-Physical Systems,Â 6(1), 1-32.	As the Industrial Internet of Things (IIoT) becomes more ubiquitous in critical application domains, such as smart water-distribution and transportation systems, providing security and resilience against cyber-attacks grows into an issue of utmost importance. Cyber-attacks against critical infrastructure pose significant threats to public health and safety. To alleviate the severity of these thre…	.				X	The paper discusses the use of IoT in designing secure and resilient industrial IoT systems for critical application domains, such as smart water distribution systems. The paper specifically presents case studies in water distribution systems, which falls under the IoT-based water distribution systems category. The paper does not discuss IoT-based water quality monitoring, IoT-based wastewater ma…	.
	230	Harnessing technology for mitigating water woes in the city of Bengaluru	Iyer, L. S., & Giri, S. V. (2020). Harnessing technology for mitigating water woes in the city of Bengaluru. InÂ Journal of Physics: Conference SeriesÂ (Vol. 1427, No. 1, p. 012004). IOP Publishing.	Industrialization has caused most of the world's environmental problems like climate change, water security issues, biodiversity issues among others. Water-related issues like water scarcity, lack of water quality, water sanitation issues, lack of proper water resources management are some of them. Urbanization, population increase, pollution has led to an increase in water demand. Water being th…	.			X		Paper 99: The paper proposes harnessing technology for mitigating water woes in the city of Bengaluru, focusing on water conservation.	.
	231	Intelligent Hardware-Software Platform for Efficient Coupling of Water-Energy Nexus in Smart Cities: A Conceptual Framework	Pindoriya, N., Duchon, M., Gupta, P. K., Pampana, V., Singh, S. N., Giza, J., ... & Jethi, J. (2020). Intelligent hardware-software platform for efficient coupling of water-energy nexus in smart cities: A conceptual framework. InÂ Mobility Internet of Things 2018: Mobility IoTÂ (pp. 217-231). Springer International Publishing.	Smart cities are envisioned to efficiently use two most critical resources: water and energy. Advanced techniques are being developed to conserve water and to minimize the use of conventional energy. The integration of battery energy storage (BES) technology and renewable energy (RE) sources in the system is very much required to enable the efficient coupling and modularization of electricity and…	.			X		Paper 100: The paper proposes an intelligent hardware-software platform for efficient coupling of water-energy nexus in smart cities, focusing on water conservation and smart water distribution systems.	.
	232	An overview of the alfa crux cubesat mission for narrowband communication	Reis, L. R., Borges, R. A., Leite, J. P., Cappelletti, C., & Battistini, S. (2020). An overview of the alfa crux cubesat mission for narrowband communication.Â Advances in the Astronautical Sciences, (173), 245-255.	The development and operation of a reliable voice and data communication systems in remote or difficult-to-reach areas is still a challenge in the modern world. In this framework, the mission Alfa Crux, based on a nanosatellite system under development at the Laboratory of Simulation and Control of Aerospace Systems (LODESTAR), University of Brasilia (UnB), Brazil, proposes the use of narrow band…	.				X	This paper discusses the Alfa Crux nanosatellite system, which aims to improve communication technology in remote areas, including improving agricultural monitoring and water level controlling in rivers and reservoirs. Although the paper mentions IoT and M2M communication, it does not directly use IoT for water or wastewater management. However, since the paper explicitly mentions the monitoring …	.
	233	Real-time sensor-based prediction of soil moisture in green infrastructure	Scarbrough, K. (2020). Real-Time Sensor-Based Prediction of Soil Moisture in Green Infrastructure. InÂ IIE Annual Conference. ProceedingsÂ (pp. 1169-1175). Institute of Industrial and Systems Engineers (IISE).	Green infrastructure (GI) inspection and maintenance is an increasingly common burden for stormwater managers and utilities nationwide. Harnessing the possibilities of the Internet of Things (IOT) and sensor data-driven decision making can help inform and optimize green infrastructure inspection and maintenance. It is, however, unclear how many sensors would be needed to accurately monitor GI per…	.				X	The paper directly uses IoT-based sensors for monitoring soil moisture in green infrastructure, which falls under the category of IoT-based water quality monitoring. The paper does not involve wastewater management, water distribution systems, or water conservation, nor is it unrelated to the topic of water and wastewater networks management. Therefore, it falls under the category of IoT-based wa…	.
	234	Balancing innovation and vulnerability: Water security in an age of cyber-warfare	Petersen, K. A. T. R. I. N. A., & Wieltschnig, P. E. T. E. R. (2020). Balancing innovation and vulnerability: Water security in an age of cyber-warfare.Â WIT Transactions on Ecology and the Environment,Â 242, 71-82.	Through technological and organisational innovations, water services are increasingly finding new pathways to reduce water insecurity. For instance, the real-time detection of water pollution through the deployment of novel sensors can mitigate contamination problems before they become widespread. While these tools open up new forms of water security, they simultaneously create new forms of vulne…	.				X	This paper addresses the vulnerabilities arising from increasing interconnectivity and digitalization in water infrastructures, paying particular attention to demographics at risk of insecurity due to cyber-warfare. Although the paper does not directly use IoT for water and wastewater infrastructures and networks management, it discusses the potential cyber-attacks that can target these systems. …	.
	235	Real-time monitoring of water level and storage dynamics of irrigation tank using IoT	Krishnaveni, M., Praveen Kumar, S. K., Arul Muthusamy, E., Kowshick, J., & Arunya, K. G. (2020). Real-time monitoring of water level and storage dynamics of irrigation tank using IoT.Â H2Open Journal,Â 3(1), 392-400.	The internet of things (IoT), an emerging technological marvel, consists of a group of physical objects such as vehicles, machines and sensors to monitor and transfer data over the internet with much less human to machine interaction. It relies on a host of technologies like application programming interfaces (API), which in turn, help the devices to get connected with the internet. Efficient irr…	.				X	The paper (242) falls under the category of IoT-based water distribution systems as it describes the use of IoT devices and sensors to monitor the water level and storage dynamics of an irrigation tank. The data collected is sent to the cloud for storage and can be accessed through a web or mobile application. The device provides real-time continuous water level data with low cost and simple infr…	.
	236	The Development of Smart Home Disaster Prevention System	Su, Z. P., Hsu, C. C., Wu, Z. Y., & Liu, C. H. (2020). The Development of Smart Home Disaster Prevention System. InÂ 6GN for Future Wireless Networks: Third EAI International Conference, 6GN 2020, Tianjin, China, August 15-16, 2020, Proceedings 3Â (pp. 445-451). Springer International Publishing.	Building smart home within Internet of Things (IoT) technology can bring residents living convenience. A smart home infrastructure needs to be built with the Internet of things and wireless network. In this article, using the raspberry Pi to build a smart home disaster prevention system. The system functions proposed in this article are: 1. Real-time monitoring of home environment and safety issu…	.				X	The paper proposes the development of a smart home disaster prevention system that includes several IoT-based features, such as real-time monitoring of home environment and safety issues, indoor and pot temperature and humidity sensing, disaster detection, and fish tank water level detection. While the paper does not directly relate to water and wastewater networks management, it includes a featu…	.
	237	IoT architecture for enhancing rural societal services in sub-Saharan Africa	Nigussie, E., Olwal, T. O., Lemma, A., Mekuria, F., & Peterson, B. (2020). Iot architecture for enhancing rural societal services in sub-saharan africa. Procedia Computer Science, 177, 338-344.	The potential of IoT in contributing towards sustainable economic development in Sub-Saharan Africa (SSA) through digital transformation and effective service delivery is widely accepted. However, the unreliability/unavailability of connectivity and power grid infrastructure as well as the unaffordability of the overall system hinders the implementation of a multi-layered IoT architecture for rur…	.				X	The paper presents an IoT architecture for enhancing rural societal services in Sub-Saharan Africa. Specifically, the paper proposes an affordable IoT architecture that operates without reliance on broadband connectivity and power grid and employs energy harvesting systems for data processing, actuation decisions, and network management locally. The paper also shares the customized low-cost compu…	.
	238	Outer space activities and city evolution	Thangavelu, M. (2020). Outer Space Activities and City Evolution. InÂ ASCEND 2020Â (p. 4059).	Just as the space community is expanding our presence into the solar system and beyond, a group of thought leaders, including visionary policy makers, architects, engineers and allied professionals are peering into the Earth, studying co-relations of various dynamic systems including land, air and sea agents, and finding new ways to report and apply the data from space-based assets, for the immed…	.				X	The paper discusses the potential application of mature, adaptable and viable space technologies, including IoT-based systems, to enhance city life and infrastructure. Specifically, the paper mentions the potential deployment of IoT across a myriad of devices for monitoring and responding to citywide needs like traffic and resource management, as well as the production of potable water and recycl…	.
	239	The green revolution for oil & gas using battery-less NB-IoT IIoT devices powered by waste heat for process maintenance	Aragones Ortiz, R., Nicolas Alegret, R., Oliver Malagelada, J., Malet MuntÃ©, R., Ferrer Ramis, C., Comellas Vogel, D., & Voces Merayo, R. (2020, November). The Green Revolution for Oil&Gas Using Battery-Less NB-IoT IIoT Devices Powered by Waste Heat for Process Maintenance. InÂ Abu Dhabi International Petroleum Exhibition & Conference. OnePetro.	Our planet has a tremendous problem with the air pollution and climate change. The last study published by Jos Lelieveld et al. [1] remarks the high exposition risk of EU Citizens to suffer cardiovascular diseases due to our poisonous air quality, killing yearly 800.000 EU citizens and reducing 2.2 years our life expectancy. Additionally, the last report presented on the UN conference for climate…	.				X	This paper focuses on the use of IoT devices for process maintenance in energy-intensive industries, such as chemical, petrochemical, and oil refineries. The INDUEYE IIoT devices presented in the paper are wireless and battery-less and are powered by waste heat to measure vibrations in rotative machines. The devices utilize long-range wireless protocols such as NB-IoT and LoRa to eliminate the ne…	.
	240	IoT-based irrigation management for smallholder farmers in rural Sub-Saharan Africa	Nigussie, E., Olwal, T., Musumba, G., Tegegne, T., Lemma, A., & Mekuria, F. (2020). IoT-based irrigation management for smallholder farmers in rural sub-Saharan Africa.Â Procedia Computer Science,Â 177, 86-93.	Ensuring food security has become a challenge in Sub-Saharan Africa (SSA) due to combined effects of climate change, high population growth, and relying on rainfed farming. Governments are establishing shared irrigation infrastructure for smallholder farmers as part of the solutions for food security. However, the irrigated farms often failed to achieve the expected crop yield. This is partly due…	.				X	Although the paper focuses on IoT-based irrigation management for smallholder farmers in rural sub-Saharan Africa, it still falls under the category of IoT-based water quality monitoring because it proposes an IoT-based system for monitoring soil, microclimate, and water parameters, which are all relevant to water quality monitoring. It does not fall under any of the other categories as it does n…	.
	241	Investigation of cyber attacks on a water distribution system	Adepu, S., Palleti, V. R., Mishra, G., & Mathur, A. (2020). Investigation of cyber attacks on a water distribution system. InÂ Applied Cryptography and Network Security Workshops: ACNS 2020 Satellite Workshops, AIBlock, AIHWS, AIoTS, Cloud S&P, SCI, SecMT, and SiMLA, Rome, Italy, October 19â€“22, 2020, Proceedings 18Â (pp. 274-291). Springer International Publishing.	A Cyber Physical System (CPS) consists of cyber components for computation and communication, and physical components such as sensors and actuators for process control. These components are networked and interact in a feedback loop. CPS are found in critical infrastructure such as water distribution, power grid, and mass transportation. Often these systems are vulnerable to attacks as the cyber c…	.				X	I categorized paper 248 under "IoT-based water distribution systems" and "IoT-based water quality monitoring" categories. This paper investigates the impact of cyber attacks on a water distribution system (WADI) using a specially designed tool. Although the paper does not explicitly mention the use of IoT, it is implicit that the water distribution system includes IoT components such as sensors a…	.
	242	Soil moisture monitoring for plant irrigation: A botanic tourism sustainability during Covid-19 pandemic	Samah, K. A. F. A., Arip, M. A. M., Deraman, N. A., Buja, A. G., & Jono, M. N. H. H. (2020). Soil moisture monitoring for plant irrigation: A botanic tourism sustainability during Covid-19 pandemic.Â International Journal of Emerging Trends in Engineering Research, 82-89.	This paper describes a preliminary study on the adaptation of data visualization and the Internet of Things (IoT) to monitor the soil moisture of plant irrigation to sustain botanic tourism. It is compulsory to perform a daily irrigation schedule until the plants can live independently. However, due to the Covid-19 pandemic, insufficient infrastructure, work rotation at the share-farm, and unpred…	.				X	The paper proposes the use of IoT for monitoring soil moisture in a botanical area to sustain botanic tourism. It utilizes a mobile-based application with monitoring features and an IoT connection linked to a water pump for remote irrigation. Although it does not directly deal with water distribution systems, wastewater management, or water quality monitoring, it falls under the category of IoT-b…	.
	243	A smart energy management system for cross-sectoral coupling and water-energy nexus	Pampana, V., Gupta, P. K., & Duchon, M. (2020). A Smart Energy Management System for Cross-sectoral Coupling and Water-energy Nexus. InÂ SMARTGREENSÂ (pp. 107-113).	Cross-sectoral coupling is one of the newly emerging research topics that refers to the idea of interconnecting and integrating the energy consuming sectors like buildings (heating and cooling), transport, water supply systems and other energy intensive process with the power-producing sector. The cross-sectoral integration of the water-energy nexus and the sustainability issues surrounding the a…	.				X	The paper proposes a software architecture for a smart energy management system for cross-sectoral coupling and water-energy nexus. It focuses on the integration of the water-energy nexus and proposes a platform for monitoring, controlling, decision-making, and analyzing the effect of decisions for water and energy nexus. It directly uses IoT technology for water and energy infrastructure managem…	.
	244	A Two-Layer Water Demand Prediction System in Urban Areas Based on Micro-Services and LSTM Neural Networks	Nasser, A. A., Rashad, M. Z., & Hussein, S. E. (2020). A two-layer water demand prediction system in urban areas based on micro-services and LSTM neural networks.Â IEEE Access,Â 8, 147647-147661.	In recent years, scarce water resources became one of the main problems that endanger human species existence and the advancement of any nation. In this research, smart water meters were implemented, distributed, and installed in a regional area in Cairo while data were collected at uniform intervals then sent to the cloud instantly. The solution paradigm uses an Internet of Things (IoT) based on…	.				X	The paper proposes a two-layer water demand prediction system in urban areas based on micro-services and LSTM neural networks, which is an IoT-based system that utilizes smart water meters and real-time streaming to collect and analyze water consumption data. Therefore, the paper falls under the category of "IoT-based water quality monitoring." The paper does not directly discuss wastewater manag…	.
	245	Yet a smarter irrigation system	Lopes, S. F., Pereira, R. M., Lopes, S. O., Coutinho, M., Malheiro, A., & Fonte, V. (2020). Yet a smarter irrigation system. InÂ Science and Technologies for Smart Cities: 5th EAI International Summit, SmartCity360, Braga, Portugal, December 4-6, 2019, ProceedingsÂ (pp. 337-346). Springer International Publishing.	A new type of irrigation system is being developed in the context of the research project 02/SAICT/2017-28247-FCT-TO-CHAIR. The output are irrigation plans based on optimal control theory that minimize water usage and keep crops safe. In this paper, we present the main features of the system prototype. The system uses soil moisture sensors in the field, weather forecasts and parameters that the f…	.				X	This paper presents the development of a new type of irrigation system that uses soil moisture sensors, weather forecasts, and parameters provided by the farmer to implement an Optimal Control algorithm to compute the irrigation plan for the crop field. Although the system aims to minimize water usage and keep crops safe, it does not directly use IoT technology for water and wastewater networks m…	.
	246	Modern approach to design a distributed and scalable platform architecture for smart cities complex events data collection	Basmi, W., Boulmakoul, A., Karim, L., & Lbath, A. (2020). Modern approach to design a distributed and scalable platform architecture for smart cities complex events data collection.Â Procedia Computer Science,Â 170, 43-50.	Throughout decades, many concepts to renovate cities have surfaced such as digital city, green city, smart cities and so forth, so that citizens can reach urban services and exercise their activities easily with respect to the environment's sustainability, by limiting energy waste, optimization of urban infrastructure costs, automation of many routines and efficient allocation of human resources.…	.				X	The paper does not directly address IoT-based water and wastewater infrastructures and networks management, but it does discuss the architecture of a distributed and scalable platform for smart cities to collect and broadcast data on various urban events, including water-related ones such as water level. Therefore, the paper falls under all four categories of IoT-based water quality monitoring, I…	.
	247	WaterAMI - Water Automated Metering Infrastructure Based on an Energy Aware Wireless Mesh Network Communication Protocol	Vieira, A., PatrÃ£o, C., GonÃ§alves, T., Monteiro, P., Marcelino, S., Filipe, E., ... & Carvalho, J. (2020). WaterAMI-Water Automated Metering Infrastructure Based on an Energy Aware Wireless Mesh Network Communication Protocol. InÂ Sustainable Energy for Smart Cities: First EAI International Conference, SESC 2019, Braga, Portugal, December 4â€“6, 2019, Proceedings 1Â (pp. 209-220). Springer Inte…	The WaterAMI is an Integrated Management of Efficiency System (IMES) of Water Distribution Networks (WDN) supported in an Automated Metering Infrastructure (AMI). It has a positive impact in energy consumption and in the water management, on one hand decreasing the water losses, on the other, by measuring and controlling water resources as well as water demand, supported in data science by predic…	.				X	The paper discusses the Water Automated Metering Infrastructure (WaterAMI) system, which is an IoT-based water distribution system that uses LPWAN-AfE-EA protocol for communication among devices. It emphasizes the positive impact of WaterAMI in water management and energy consumption by reducing water losses and controlling water resources and demand. Therefore, the paper falls under the IoT-base…	.
	248	Remit Accretion in IOT Networks Encircling Ingenious Firefly Algorithm Correlating Water Drop Algorithm	Sharma, N., Batra, U., & Zafar, S. (2020). Remit accretion in iot networks encircling ingenious firefly algorithm correlating water drop algorithm.Â Procedia Computer Science,Â 167, 551-561.	In current scenario of internet usage with a raPID rate, Internet of Things (IOT) has become innovation has become the most smart and innovative solution for users. IOT requires utilization, arrangement and association of not only homogeneous but also heterogeneous systems: not only infrastructure based but also infrastructure-less systems. So this requirement of heterogeneous based infrastructur…	.				X	I categorized paper 255 under all four categories because it discusses the optimization of routing protocols in IoT-MANET networks using bio-inspired algorithms, which can be applied to various real-time industries, including water quality monitoring, wastewater management, water distribution systems, and water conservation. The paper does not fit under the "Not Related" category because it direc…	.
	249	Intelligent Wireless Sensor Networks for Precision Agriculture	Anitha, D., Shelke, V. D., Anupama, C. G., & Rajan, P. (2020). Intelligent Wireless Sensor Networks for Precision Agriculture. InÂ Artificial Intelligence and Evolutionary Computations in Engineering SystemsÂ (pp. 167-181). Springer Singapore.	Wireless sensor networks (WSNs) today generate a large amount of data which is then analyzed on a centralized server to get actionable insights from the data. As the entire IoT infrastructure is expensive for the user, especially in the case of a farmer, precision agriculture improves the overall cost of farm products. Precision agriculture helps farmers by making farming efficient, and due to th…	.				X	This paper proposes the use of intelligent wireless sensor networks for precision agriculture, where the analysis of soil moisture data is done to predict the growth rate of plants. This falls under the category of IoT-based water conservation since the analysis helps in monitoring the growth rate of the farm in a controlled manner, resulting in the efficient use of water. Additionally, the paper…	.
	250	Intelligent Water Management System: Smart Approach Towards SustainabilityÂ (Smart Water)	Saluja, M. (2020). Intelligent Water Management System: Smart Approach Towards Sustainability (Smart Water). InÂ ISGW 2018 Compendium of Technical Papers: 4th International Conference and Exhibition on Smart Grids and Smart CitiesÂ (pp. 261-271). Springer Singapore.	Whenever we address India, the Initial thought one can come up with is the population of this country which is going to surpass the Chinaâ€™s population in 2024 and is projected to touch 1.5 Billion; said by UN Official. It is anticipated that India will be the highest populous country along with the fastest growing economy in the world but despite of economic opportunity, Indiaâ€™s infrastructur…	.	X				101 - The paper proposes an intelligent water management system for sustainable water usage, which includes IoT-based water quality monitoring and water conservation methods.	.
	251	Everything is awesome! or is it? Cyber security risks in critical infrastructure	Rashid, A., Gardiner, J., Green, B., & Craggs, B. (2020). Everything is awesome! or is it? cyber security risks in critical infrastructure. InÂ Critical Information Infrastructures Security: 14th International Conference, CRITIS 2019, LinkÃ¶ping, Sweden, September 23â€“25, 2019, Revised Selected Papers 14Â (pp. 3-17). Springer International Publishing.	Industrial Control Systems (ICS) play an important role in the monitoring, control and automation of critical infrastructure such as water, gas, oil and electricity. Recent years have seen a number of high profile cyber attacks on such infrastructure exemplified by Stuxnet and the Ukrainian Power Grid attacks. This naturally begs the question: how should we manage cyber security risks in such inf…	.				X	Paper 258 discusses the cyber security risks in critical infrastructure, including water networks that use Industrial Control Systems (ICS) to monitor and control them. Although the paper does not directly discuss IoT-based water or wastewater management, it is included in all four categories as it highlights the risks and challenges posed by the convergence of the Internet of Things (IoT) and cr…	.
	252	Comparative Study of the Common Cyber-physical Attacks in Industry 4.0	Oueslati, N. E., Mrabet, H., Jemai, A., & Alhomoud, A. (2019, December). Comparative study of the common cyber-physical attacks in industry 4.0. InÂ 2019 International Conference on Internet of Things, Embedded Systems and Communications (IINTEC)Â (pp. 1-7). IEEE.	The open structure, different technical possibilities and anonymity represent the main reasons why the internet is misused as a platform for attack. This is also reflected in the creation of today's cyber-attacks. Following early 1960, industrial process control has been applied by electric systems. In the mid-1970s, the Supervisory Control and Data Acquisition (SCADA) emerged, describing the aut…	.				X	The paper discusses the different cyber-physical attacks that can target industry 4.0 systems, including those related to water management. The paper mentions the Maroochy Water Services attack, which was a cyber-physical attack on water management systems. Additionally, the paper discusses vulnerabilities in water distribution systems and proposes security measures to address them. Therefore, we…	.
	253	Drown Prevention and Flood prediction using smart embedded devices	Samarasinghe, D., De Silva, P. M., Mudalige, T. U., Gamage, M. K. I., & Abeygunawardhana, P. K. W. (2019, December). Drown Prevention and Flood prediction using smart embedded devices. InÂ 2019 International Conference on Advancements in Computing (ICAC)Â (pp. 304-309). IEEE.	Drowning and Flood becomes major negative impact to the mankind and infrastructure. Drowning is caused by the when person go into deeper areas or else due to a person's health condition. Flood is a natural disaster commonly caused by the run of rivers due to excessively highly rainy season or due to environment effect or global warming effect. Hence IoT with sensor technology support us to effici…	.				X	102 - The paper proposes using smart embedded devices for drowning prevention and flood prediction. Although it deals with water management, it does not directly use IoT technology, so it is categorized as "Not Related."	.
	254	IoT sensing and control network for pico-hydroelectric in the Nepal himalayas	Yeh, H. J. J., Stambaugh, M., Zahnd, A., & Yeh, K. (2019, December). IoT Sensing and Control Network for Pico-Hydroelectric in the Nepal Himalayas. InÂ 2019 International Conference on Computational Science and Computational Intelligence (CSCI)Â (pp. 1184-1189). IEEE.	We describe the Internet-of-Things (IoT) network, the Arduino platform and integrated development environment (IDE), and the JSON communications protocol, to manage a pico-hydroelectric system in a Himalayan Nepalese village. This demonstrates the usability and reliability of open-source IoT devices and platforms in critical green energy infrastructure at difficult-to-reach places. The local syst…	.	X				103 - The paper proposes an IoT sensing and control network for pico-hydroelectric power plants in Nepal. The system uses IoT technology for water quality monitoring, so it is categorized under "IoT-based water quality monitoring."	.
	255	Management of Smart Water Treatment Plant using IoT Cloud Services	El Sayed, H. Y., Al-Kady, M., & Siddik, Y. (2019, December). Management of smart water treatment plant using iot cloud services. InÂ 2019 International Conference on Smart Applications, Communications and Networking (SmartNets)Â (pp. 1-5). IEEE.	Water Treatment Plant (WTP) is an important infrastructure to ensure human health and the environment. In its development, aspects of environmental safety and health are of great importance. Smart WTP is a water station that is managed using software-based tools such as data analytics, visualization, and predictive analytics. WTP smart management system is developed to manage Big Data information…	.	X		X		104 - The paper proposes managing a smart water treatment plant using IoT cloud services. The system includes IoT-based water quality monitoring and IoT-based water distribution systems, so it is categorized under both "IoT-based water quality monitoring" and "IoT-based water distribution systems."	.
	256	A Comparative Study of LoRaWAN, SigFox, and NB-IoT for Smart Water Grid	Purnama, A. A. F., & Nashiruddin, M. I. (2019, December). Designing LoRaWAN Internet of Things network for advanced metering infrastructure (AMI) in Surabaya and its surrounding cities. InÂ 2019 International Seminar on Research of Information Technology and Intelligent Systems (ISRITI)Â (pp. 194-199). IEEE.	Low Power Wide Area Networks (LPWAN) are becoming the powerful communication technologies of the IoT of tomorrow. LoRaWAN, SigFox, and NB-IoT are the three competing LPWAN technologies. On the other hand, Smart Water Grid (SWG) is an emerging paradigm that promises to over come issues such as pipes leaks encountered by current water infrastructure by deploying smart devices into the water infrast…	.			X		105 - The paper proposes designing a LoRaWAN IoT network for advanced metering infrastructure in Surabaya and its surrounding cities. The system uses IoT technology for wastewater management, so it is categorized under "IoT-based wastewater management" and "IoT-based water distribution systems."	.
	257	Designing LoRaWAN Internet of Things Network for Advanced Metering Infrastructure (AMI) in Surabaya and Its Surrounding Cities	Purnama, A. A. F., & Nashiruddin, M. I. (2019, December). Designing LoRaWAN Internet of Things network for advanced metering infrastructure (AMI) in Surabaya and its surrounding cities. InÂ 2019 International Seminar on Research of Information Technology and Intelligent Systems (ISRITI)Â (pp. 194-199). IEEE.	The application of the Internet of Things (IoT) is increasing rapidly in Indonesia because it has the potential to be used for various business purposes. One of the most popular use cases of IoT is for the measurement of electricity, water, gas, and fuel distributions, also known as Advanced Metering Infrastructure (AMI). This paper aims to plan the LoRaWAN technology-based IoT network for AMI se…	.				X	The paper, "Designing LoRaWAN Internet of Things network for advanced metering infrastructure (AMI) in Surabaya and its surrounding cities" by Purnama and Nashiruddin, is categorized under IoT-based water quality monitoring because it discusses the planning of an IoT network for Advanced Metering Infrastructure (AMI), which is used for the measurement of water distributions. The authors use LoRaW…	.
	258	LoRa-based IoT Network Planning for Advanced Metering Infrastructure in Urban, Suburban and Rural Scenario	Bagariang, Y., Nashiruddin, M. I., & Adriansyah, N. M. (2019, December). Lora-based iot network planning for advanced metering infrastructure in urban, suburban and rural scenario. InÂ 2019 International Seminar on Research of Information Technology and Intelligent Systems (ISRITI)Â (pp. 188-193). IEEE.	Internet of Things is predicted to be the future of digital business in Indonesia. The trend of IoT implements on a large scale as more sensors and devices are connected. LoRa is one of the promising applications of the Internet of Things with long-range wireless communication in broad areas. LoRa network deployment in Advanced Metering Infrastructure (AMI) is one of the most significant componen…	.				X	The paper proposes the use of LoRa for Advanced Metering Infrastructure (AMI) in three utilities including water metering in urban, suburban, and rural areas. Although the focus of the paper is on AMI, it directly uses IoT for water distribution systems, which falls under the category of IoT-based water quality monitoring. Therefore, the paper falls under this category.	.
	259	Blockchain and IoT based formal model of smart waste management system using TLA+	Latif, S., Rehman, A., & Zafar, N. A. (2019, December). Blockchain and iot based formal model of smart waste management system using tla+. InÂ 2019 International Conference on Frontiers of Information Technology (FIT)Â (pp. 304-3045). IEEE.	The mechanism of integrating smart nodes with each other using a network to communicate, share information is known as Internet of Things (IoT). The usage and simulation of IoT infrastructure in every field is increasing rapidly. Blockchain technology refers to as the interconnected nodes within a network which are independent of each other work as a network. Any node can be a part of blockchain …	.				X	This paper proposes a smart waste management system using IoT and blockchain technology. The system includes various features such as waste material identification, categorization, transfer, recycling, and decision-making processes. Since the paper is not directly related to water and wastewater infrastructures and networks management, it cannot be categorized under IoT-based water quality monito…	.
	260	An integrated conceptual approach for the monitoring and modelling of geo-structures subjected to climatic loading	Jayasundara, C., Deo, R. N., & Kodikara, J. (2019). An integrated conceptual approach for the monitoring and modelling of geo-structures subjected to climatic loading.Â Physics and Chemistry of the Earth, Parts A/B/C,Â 114, 102798.	Advancement of knowledge on the behaviour of unsaturated soil through constitutive modelling is an area of active research within the geotechnical community. Given that most of the Earth surface can be considered unsaturated and most of the geotechnical infrastructures constitute of compacted soil, advancements in predictive modelling are needed for reliable management of geo-infrastructures. Mor…	.				X	The paper discusses an integrated approach for monitoring and modeling geo-structures subjected to climatic loading using geophysical and proximal optical sensing methods. There is no mention of IoT being used for water and wastewater infrastructure management. Therefore, the paper falls under the "Not Related" category for water and wastewater infrastructure management. However, the paper does m…	.
	261	Demonstrability of Narrowband Internet of Things technology in advanced metering infrastructure	Wan, L., Zhang, Z., & Wang, J. (2019). Demonstrability of Narrowband Internet of Things technology in advanced metering infrastructure.Â EURASIP Journal on Wireless Communications and Networking,Â 2019, 1-12.	The deployment cost of advanced metering infrastructure (AMI), one of the key elements for smart grid, often arises from three sub-systems, respectively referred to as data management system, communication network, and smart devices. Among them, the costs of communication network account for a considerable proportion. In smart grid, smart devices are generally fixed in a certain position and sche…	.				X	I categorized this paper under "IoT-based water distribution systems" and "IoT-based water quality monitoring." The paper discusses the use of Narrowband Internet of Things (NB-IoT) technology for advanced metering infrastructure (AMI) communication in smart grids. The AMI includes smart devices for meter data collection, including water meters. The use of NB-IoT technology is analyzed for its po…	.
	262	Integration of participatory approaches, systems, and solutions using IoT and AI for designing smart community: Case studies from India	Ramesh, M. V. (2019, November). Integration of participatory approaches, systems, and solutions using IoT and AI for designing smart community: Case studies from India. InÂ Proceedings of the 1st ACM International Workshop on Technology Enablers and Innovative Applications for Smart Cities and CommunitiesÂ (pp. 4-5).	The present era witnessed the encroachment of Information and Communication Technology (ICT) in all aspects of human life and it is changing the living conditions. By discovering new ways of using ICT for economic, social and cultural progress, communities around the world are transforming into smart communities through addressing the needs of their inhabitants. The key verticals that define a sm…	.				X	The paper discusses the integration of IoT and AI in designing smart communities, including key verticals such as smart governance, smart energy, smart building, smart mobility, smart infrastructure, smart technology, smart healthcare, and smart citizen. Within these verticals, the paper specifically mentions the thematic areas of water and environment, which fall under the categories of IoT-base…	.
	263	A novel approach to resource starvation attacks on message queuing telemetry transport brokers	Da Paz, R., Sehovic, A., Cook, D. M., & Armstrong, L. (2019, November). A novel approach to resource Starvation attacks on message queuing telemetry transport brokers. InÂ 2019 4th International Conference on Information Technology, Information Systems and Electrical Engineering (ICITISEE)Â (pp. 150-154). IEEE.	The Message Queuing Telemetry Transport (MQTT) protocol is an established bandwidth-efficient method of connection with remote locations using wireless sensor networks. It forms a backbone infrastructure for IoT collection and analytics. The collection and sharing of data by embedded devices and heterogeneous systems fuels an ever-increasing reliance on secure data. An important consideration is …	.				X	The paper focuses on the security of MQTT brokers, which are used as a backbone infrastructure for IoT collection and analytics, and do not directly relate to water and wastewater infrastructures and networks management. Therefore, the paper falls under the "Not Related" category.	.
	264	Design and implementation of smart metering device using specialized IC ADE-7753 and its integration with web server for smart grid	Sabir, F., Chohan, M. A., & Pirzada, B. (2019, November). Design and implementation of smart metering device using specialized IC ADE-7753 and its integration with web server for smart grid. InÂ 2019 Second International Conference on Latest trends in Electrical Engineering and Computing Technologies (INTELLECT)Â (pp. 1-5). IEEE.	Now a days, the conventional grid requires an infrastructure called Smart grid for two-way communication between consumers and utility. Smart meter is one of the major parts of smart grid. The main purpose of a smart meter is to record the energy consumption of consumers and transmit the data to the utility company. Smart Meter plays a vital role to enhance and improve reliability of electric pow…	.				X	The paper is about the design and implementation of a smart metering device for the smart grid using the specialized IC ADE-7753 and its integration with a web server. While the paper discusses the implementation of a smart metering device, it does not focus on IoT-based water and wastewater infrastructure management. Therefore, the paper is not related to the categories provided. However, since …	.
	265	Monitoring of residential drinking water service consumption using human machine interaction (HCI) techniques	Chilcanan, D., Cuzco, C., & Uyaguari, A. (2019, October). Monitoring of residential drinking water service consumption using Human Machine Interaction (HCI) techniques. InÂ Proceedings of the 2019 3rd International Conference on Advances in Artificial IntelligenceÂ (pp. 152-156).	The integration of the drinking water network with information and communication technologies (ICTs) is the future of automated metering for users and service providers, the modern world cannot be conceived without water and the current infrastructure of manual metering, is poorly adapted to current needs, every day the demand for this vital liquid is greater and data collection from meters must …	.				X	I categorized this paper under IoT-based water quality monitoring because it proposes an implementation for Smart Water Meter (SWM) using virtual assistant and metering network to allow users to consult the m3 of water consumed per day, week and month. The proposed system integrates hardware and free software for greater security in communications, making it a system for monitoring water quality …	.
	266	Towards smart mobility during flooding events in urban areas using crowdsourced information	Castro, U., Avila, J., Sustaita, C. V., Hernandez, M. A., Larios, V. M., Villanueva-Rosales, N., ... & Maciel, R. (2019, October). Towards Smart Mobility During Flooding Events in Urban Areas using Crowdsourced Information. InÂ 2019 IEEE International Smart Cities Conference (ISC2)Â (pp. 154-159). IEEE.	Flooding hinders the ability of residents to move through-out urban areas. Current weather information systems provide weather forecasts with a granularity too coarse to inform city residents of floods at a street level. Reliable real-time data is also limited in some cities and only a few systems enable users to report flooding events. This research project aims to inform residents about floodin…	.				X	106 - The paper proposes using crowdsourced information to facilitate smart mobility during flooding events in urban areas. Although it deals with water management, it does not directly use IoT technology, so it is categorized as "Not Related."	.
	267	Model assisted compressive data gathering in dense IoT monitoring of water distribution networks	Eltabie, O. M., Ghuniem, A. M., & Abdelkader, M. F. (2019, October). Model assisted compressive data gathering in dense IoT monitoring of water distribution networks. InÂ 2019 IEEE International Smart Cities Conference (ISC2)Â (pp. 444-450). IEEE.	Smart city applications are becoming among the fastest growing segments of government. One of their highly promising applications is the continuous dense monitoring of critical infrastructure such as water, gas, and electrical networks. Technology advancements have made it possible to create low cost battery-operated internet of things (IoT) devices to monitor the operating parameters of these ne…	.				X	The paper proposes a compressive data gathering approach that utilizes information from existing operation models of water distribution networks and combines it with the temporal and spatial correlation of the measured data in a compressive sensing (CS) framework. The proposed approach can effectively reduce the required number of measurements and achieves a more power-efficient node activation s…	.
	268	Monitoring networked infrastructure with minimum data via sequential graph fourier transforms	Wei, Z., Pagani, A., & Guo, W. (2019, October). Monitoring networked infrastructure with minimum data via sequential graph fourier transforms. InÂ 2019 IEEE International Smart Cities Conference (ISC2)Â (pp. 703-708). IEEE.	Many urban infrastructures contain complex dynamics embedded in spatial networks. Monitoring using Internet-of-Things (IoT) sensors is essential for ensuring safe operations. An open challenge is given an existing sensor network, where best to collect the minimum amount of representative data. Here, we consider an urban underground water distribution network (WDN) and the problem of contamination…	.				X	In this paper, the authors propose a method for monitoring an urban underground water distribution network (WDN) using IoT sensors. The proposed method is based on a principal component analysis-based Graph Fourier Transform (PCA-GFT) technique that can recover the full networked signal from a dynamic subset of sensors. The paper directly uses IoT sensors for water distribution network monitoring…	.
	269	A lightweight risk analysis of a critical infrastructure based ICSs	EL IDRISSI, O., MEZRIOUI, A., & BELMEKKI, A. (2019, October). A lightweight risk analysis of a critical infrastructure based ICSs. InÂ 2019 1st International Conference on Smart Systems and Data Science (ICSSD)Â (pp. 1-8). IEEE.	Industrial Control Systems (ICS) are currently integrated into critical infrastructures and are designed to support industrial processes, monitor and control in real time a large number of processes and operations such as gas and electricity distribution (conventional and nuclear), water treatment, etc. ICSs have evolved significantly in recent years and have embraced new technologies such as IoT…	.				X	The paper discusses risk analysis for critical infrastructure based Industrial Control Systems (ICS) that support various processes, including water treatment. While the paper does not directly use IoT for water and wastewater networks management, it mentions the integration of IoT technology into ICS, which makes it relevant to the first four categories. Therefore, the paper falls under all four…	.
	270	Graph Representation of Linear Infrastructure in Smart City IoT Systems	Gorawski, M., & Grochla, K. (2019, October). Graph representation of linear infrastructure in Smart City IoT Systems. InÂ 2019 11th International Congress on Ultra Modern Telecommunications and Control Systems and Workshops (ICUMT)Â (pp. 1-4). IEEE.	The cities infrastructure is being populated with a large number of Internet-connected devices used for monitoring and management to create a Smart City system. A large part of the city infrastructure has linear form, such as e.g. roads, energy or water distribution networks. In this paper, we present a solution for representation, processing and providing to external IT systems the data related …	.				X	In this paper, the authors propose a solution for representation and management of linear infrastructure in smart city systems using IoT. Specifically, they discuss the representation of water distribution networks using a multigraph stored in a graph database, and propose an architecture for a sample linear infrastructure management system. Therefore, this paper falls under the categories of IoT…	.
	271	Flexible Humidity Sensor Based on Electrochemically Polymerized Polypyrrole	Zhao, Q., Qian, X., Wang, X., & Lin, L. (2019, October). Flexible Humidity Sensor Based on Electrochemically Polymerized Polypyrrole. InÂ 2019 IEEE SENSORSÂ (pp. 1-4). IEEE.	Environmental sensing is an important task in the development of infrastructures for the applications of the Internet of things. In this work, we introduce a flexible humidity sensor based on electrochemically polymerized polypyrrole to absorb or desorb water vapors to detect relative humidity (RH). A test platform was built to mix the different amounts of dry and wet air for the relative humidit…	.				X	I put this paper under the category of "IoT-based water quality monitoring" because the paper presents a flexible humidity sensor that is used to detect relative humidity, which is a key factor in monitoring water quality. The sensor could be used to monitor the moisture levels in buildings and homes, which could indirectly impact the quality of water. However, the paper is not directly related t…	.
	272	IoT-enabled adaptive smart water distribution management system	Sammaneh, H., & Al-Jabi, M. (2019, October). IoT-enabled adaptive smart water distribution management system. InÂ 2019 International Conference on Promising Electronic Technologies (ICPET)Â (pp. 40-44). IEEE.	Water is the most important resource for life, such that it plays a vital role in our everyday activities. And due to the shortage of water resources, there is an increasing importance of a fair water distribution system among citizens that cope with different activity variations among citizens also it can control water consumption. Moreover, due to the growth of technology and the existence of t…	.			X		107 - The paper proposes an IoT-enabled adaptive smart water distribution management system, which includes IoT-based water distribution systems and IoT-based water conservation methods.	.
	273	A WSN-based Monitoring System to Control Sewerage	Rocher, J., Garcia-Navas, J. L., Romero, O., & Lloret, J. (2019). A WSN-based Monitoring System to Control Sewerage. In M. Alsmirat & Y. Jararweh (Eds.), 6th International Conference on Internet of Things: Systems, Management and Security, IOTSMS 2019 (pp. 277â€“282). Institute of Electrical and Electronics Engineers Inc. https://doi.org/10.1109/IOTSMS48152.2019.8939269	The sewerage is a critical infrastructure in cities because of the drainage of the urban runoff and the evacuation of the wastewater. Two types of sewerage, separated sewerage and combined sewerage, can be differentiated. In this paper, we show the application of a level sensor and a rain sensor for monitoring the separated sewerage. The level sensor is used for knowing if there is a critical lev…	.		X	X		108 - The paper proposes a wireless sensor network-based monitoring system to control sewerage. The system includes IoT-based wastewater management and IoT-based water distribution systems.	.
	274	An opacity approach for security exposure of IoT components in critical infrastructures	Colelli, R., Foglietta, C., Panzieri, S., & Pascucci, F. (2019). An opacity approach for security exposure of IoT components in critical infrastructures. 2019 IEEE International Conference on Systems, Man and Cybernetics, SMC 2019, 2019-October, 427â€“432. https://doi.org/10.1109/SMC.2019.8914291	Over the last year, the Internet of Things (IoT) drove the development of cyber-physical systems, leading the convergence between information and operational technologies. This coupling improves performances and saves costs but increases the number of vulnerabilities and the attack surface to malicious actors. Consequently, it is mandatory to understand how IoT devices can be properly integrated …	.				X	Explanation: The paper is not directly related to water and wastewater management, as it discusses the security exposure of IoT components in critical infrastructures. Therefore, it falls under the "Not Related" category.	.
	275	A real-time architecture for collaborative IoT applications in urban water management	Predescu, A., Mocanu, M., Lupu, C., Bercovici, A., & Romania, A. A. S. C. A. R. et al.â€¯; H. R. I. (2019). A real-time architecture for collaborative IoT applications in urban water management. In P. R.-E. (Ed.), 23rd International Conference on System Theory, Control and Computing, ICSTCC 2019 (pp. 839â€“844). Institute of Electrical and Electronics Engineers Inc. https://doi.org/10.1109/ICSTCC…	As democracy is seen as the best form of government to date, we consider that a similar approach should be taken in the case of the society of machines that begins to take shape in the context of Industry 4.0. For this matter, we propose a real-time architecture that allows for collaborative interaction between machines in IoT applications. The proposed solution aims to find the middle ground bet…	.			X		109 - The paper proposes a real-time architecture for collaborative IoT applications in urban water management. The system includes IoT-based water distribution systems, so it is categorized under "IoT-based water distribution systems."	.
	276	Water demand prediction for housing apartments using time series analysis	Tripathi, A., Kaur, S., Sankaranarayanan, S., Narayanan, L. K., & Tom, R. J. (2019). Water demand prediction for housing apartments using time series analysis. International Journal of Intelligent Information Technologies, 15(4), 57â€“75. https://doi.org/10.4018/IJIIT.2019100104	Water management has always been a topic of serious discussion since infrastructure, rural, and industrial development flourished. Due to the depleting water resources, this is now even a bigger challenge. So, here is developed an IoT-based water management system where ultrasonic sensors are employed for predicting the depth of water in the tank and accordingly pumping the water to the sub tank …	.				X	110 - The paper proposes water demand prediction for housing apartments using time series analysis. Although it deals with water management, it does not directly use IoT technology, so it is categorized as "Not Related."	.
	277	Anomaly detection for industrial control systems using k-means and convolutional autoencoder	Chang, C.-P., Hsu, W.-C., & Liao, I.-E. (2019). Anomaly detection for industrial control systems using k-means and convolutional autoencoder. In D. Begusic, N. Rozic, J. Radic, & M. Saric (Eds.), 27th International Conference on Software, Telecommunications and Computer Networks, SoftCOM 2019. Institute of Electrical and Electronics Engineers Inc. https://doi.org/10.23919/SOFTCOM.2019.8903886	With the rise of Internet of Things technology and smart manufacturing, the issues of cyber security in industrial control systems (ICS) have become of great concern. Critical infrastructures, such as power plants and water treatment facilities, which heavily rely on ICS, have increasingly come under cyberattack in recent years. These cyberattacks pose severe threats to public safety as well as n…	.				X	Explanation: Since the paper does not directly use IoT for water and wastewater infrastructures and networks management, it does not fall under any of the first four categories. Therefore, it falls under the "Not Related" category. The paper focuses on cybersecurity in industrial control systems, which is not related to the IoT-based water systems.	.
	278	An IoT-Based Approach to Real-Time Conditioning and Control in a Server Room	Onibonoje, M. O., Bokoro, P. N., Nwulu, N. I., & Gbadamosi, S. L. (2019). An IoT-Based Approach to Real-Time Conditioning and Control in a Server Room. 2019 International Conference on Artificial Intelligence and Data Processing Symposium, IDAP 2019. https://doi.org/10.1109/IDAP.2019.8875880	Server room provides the needed lodging for computer network infrastructures which support data transfer and storage. Beyond network attacks and failure in connectivity, the safety of the data depends mainly on the protection of such infrastructures from breakdown as a result of environmental effects. This paper presents an implementation of an Internet-of-Thing (IoT) based system for conditionin…	.				X	Paper 111: This paper describes an IoT-based approach to real-time conditioning and control in a server room, which is not directly related to water or wastewater infrastructure management, hence it falls under the "Not Related" category. However, the paper does use IoT, which is why it is marked as such.	.
	279	IOT smart city: Introduction and challenges	Gurani, P., Sharma, M., Nigam, S., Soni, N., & Kumar, K. (2019). IOT smart city: Introduction and challenges. International Journal of Recent Technology and Engineering, 8(3), 3484â€“3487. https://doi.org/10.35940/ijrte.C5245.098319	In an IOT based smart city, the most astonishing and, the most reflective component would be a much more efficient water supply. This kind of water supply treatment plant that would be established will be a much more advanced version of the already existing kinds. This water supply would help many people across the globe to get access to clean, drinking water and sanitation. Also, in such a city …	.				X	Based on the abstract, Paper 7 discusses the introduction and challenges of an IoT-based smart city. The paper mentions that a more efficient water supply would be established in such a city, which would help people get access to clean drinking water and sanitation. However, the paper does not provide any specific information on how IoT is used in water and wastewater networks management. Therefo…	.
	280	Efficient certificate revocation management schemes for IoT-based advanced metering infrastructures in smart cities	Cebe, M., & Akkaya, K. (2019). Efficient certificate revocation management schemes for IoT-based advanced metering infrastructures in smart cities. Ad Hoc Networks, 92. https://doi.org/10.1016/j.adhoc.2018.10.027	Advanced Metering Infrastructure (AMI), which refers to the communication network for the collection of power data from smart meters in a Smart Grid, is expected to be used in the service of many Smart City applications such as gas and water data collection or electric vehicle charging. As the communication within the AMI needs to be secure to protect user's power data, key management becomes a c…	.				X	Paper 112: This paper describes efficient certificate revocation management schemes for IoT-based advanced metering infrastructures in smart cities. Although it uses IoT, it is not directly related to water or wastewater infrastructure management, hence it falls under the "Not Related" category.	.
	281	Building advanced metering infrastructure using elasticsearch database and IEC 62056-21 protocol	Bajer, M. (2019). Building advanced metering infrastructure using elasticsearch database and IEC 62056-21 protocol. In M. Younas, I. Awan, & T. Hara (Eds.), 7th International Conference on Future Internet of Things and Cloud, FiCloud 2019 (pp. 285â€“290). Institute of Electrical and Electronics Engineers Inc. https://doi.org/10.1109/FiCloud.2019.00047	Building automation systems have been already around for many years. Unfortunately, the still high cost of smart building installation is difficult to justify for many noncommercial applications such as residential buildings and houses. The ongoing IoT revolution and popularization of low-cost ubiquitous networking changes drastically the situation. Nowadays, using off-the-shelf hardware and clou…	.				X	I categorized this paper under "IoT-based water quality monitoring" as it describes the use of IoT to monitor and control energy consumption in a building using off-the-shelf hardware and cloud-based computing. The paper also utilizes the Elasticsearch database to store energy usage data. Although the paper does not directly deal with water-related applications, the use of IoT technology for moni…	.
	282	Feasibility of alarm events upon smart metering in LoRa networks	Helder, F., Dester, P. S., Stancanelli, E. M. G., & Cardieri, P. (2019). Feasibility of alarm events upon smart metering in LoRa networks. 16th International Symposium on Wireless Communication Systems, ISWCS 2019, 2019-August, 480â€“484. https://doi.org/10.1109/ISWCS.2019.8877346	Internet of Things (IoT) is pushing the Internet to the next level, bringing the number of connected devices to an unprecedented amount, creating new services and improving old services like the metering system. The advanced meter infrastructure (AMI) measures, collects and analyzes the distribution and consumption of utilities such as water, electricity, and gas, which are of vital importance fo…	.				X	Paper 113: This paper describes the feasibility of alarm events upon smart metering in LoRa networks. Although it uses IoT, it is not directly related to water or wastewater infrastructure management, hence it falls under the "Not Related" category.	.
	283	Efficient hierarchical identity-based encryption system for internet of things infrastructure	Guo, L., Wang, J., & Yau, W.-C. (2019). Efficient hierarchical identity-based encryption system for internet of things infrastructure. Symmetry, 11(7). https://doi.org/10.3390/sym11070913	Security is a main concern for the Internet of Things (IoT) infrastructure as large volumes of data are collected and processed in the systems. Due to the limited resources of interconnected sensors and devices in the IoT systems, efficiency is one of the key considerations when deploying security solutions (e.g., symmetric/asymmetric encryption, authentication, etc.) in IoT. In this paper, we pr…	.				X	Explanation: This paper proposes an efficient Hierarchical Identity-Based Encryption (HIBE) system for protecting data confidentiality in distributed IoT infrastructure. Although the paper does not directly focus on water or wastewater management, it discusses security concerns in IoT infrastructure, which is relevant to all IoT-based applications, including those related to water quality monitor…	.
	284	Iot based water consumption and quality monitoring system	Selvaraj, P., Prabakaran, S., Chatterjee, S., & Srivastava, A. (2019). Iot based water consumption and quality monitoring system. International Journal of Recent Technology and Engineering, 8(2 Special Issue 4), 219â€“227. https://doi.org/10.35940/ijrte.B1041.0782S419	Today, advancement in technology and increase in population has led to over-consumption of water by households. Also, because of elevated pollution levels, water gets contaminated and can be unfit for usage. These days, a lot of water conservation and quality checking systems use Internet of Things (IoT). However, because of shortcomings of the equipment, IoT independent from anyone else can't pr…	.	X				Paper 114: This paper describes an IoT-based water consumption and quality monitoring system, which directly falls under the "IoT-based water quality monitoring" category. Additionally, it also includes IoT-based water conservation, which is why it is marked as such.	.
	285	Iot and big data framework for paddy cultivation	Revathi, N., & Sengottuvelan, P. (2019). Iot and big data framework for paddy cultivation. International Journal of Recent Technology and Engineering, 8(2), 6341â€“6348. https://doi.org/10.35940/ijrte.B3611.078219	Agriculture needs agriculturists to adopt digital in terms of low cost data acquisition from Soil, Weather and water related resources through drones, satellites, sensors and weather stations where in data sources are different, unstructured, volume and veracity of data generated is also huge which poses as a big data problem to solved. Agriculture is the backbone of India and being the largest p…	.				X	I categorized this paper under "IoT-based water quality monitoring" and "IoT-based water conservation" categories. The paper discusses the use of IoT and big data framework for paddy cultivation. Although the paper is not directly related to water and wastewater management, it talks about the importance of managing water resources in agriculture, especially in paddy cultivation, which is a water-…	.
	286	Internet of Things adoption for reconfiguring decision-making processes in asset management	Brous, P., Janssen, M., & Herder, P. (2019). Internet of Things adoption for reconfiguring decision-making processes in asset management. Business Process Management Journal, 25(3), 495â€“511. https://doi.org/10.1108/BPMJ-11-2017-0328	Purpose: Managers are increasingly looking to adopt the Internet of Things (IoT) to include the vast amount of big data generated in their decision-making processes. The use of IoT might yield many benefits for organizations engaged in civil infrastructure management, but these benefits might be difficult to realize as organizations are not equipped to handle and interpret this data. The purpose …	.				X	Based on the abstract, Paper 14 talks about the use of IoT in asset management, specifically in the water management domain. The paper mentions the need for changes in business processes and the development of new capabilities, as well as data provenance and governance. Although the paper does not directly focus on IoT-based water quality monitoring, IoT-based wastewater management, IoT-based wat…	.
	287	Smart Dashboard: A Novel Approach for Sustainable Development of Smart Cities using Fog Computing	Patel, M., & Chauhan, N. (2019). Smart Dashboard: A Novel Approach for Sustainable Development of Smart Cities using Fog Computing. 3rd International Conference on Electronics and Communication and Aerospace Technology, ICECA 2019, 632â€“636. https://doi.org/10.1109/ICECA.2019.8821813	Smart cities are able to support the growing population with a well-built infrastructure and it should also have support for all time utilities like water, electricity with improved mechanisms of IoT system. In this paper, the smart dashboard based on fog-supported architecture is discussed and it is able to provide different type of computation and communication between applications as well as t…	.				X	The paper proposes a smart dashboard based on fog-supported architecture that can provide IoT edge data analytics using big-data analytics to manage the computation to off-load at nearby fog to fulfill the requirement of current development of smart cities. The proposed system is considered robust and useful to provide the use case scenarios for different utilities of smart cities, including wate…	.
	288	Zigbee-based smart sewer	Dinesh Kumar, N., Ramanathapuram, R., Rangi, P., & Sheoran, T. (2019). Zigbee-based smart sewer. International Journal of Innovative Technology and Exploring Engineering, 8(8), 995â€“998. https://www.scopus.com/inward/record.uri?eid=2-s2.0-85067857046&partnerID=40&md5=67e7d7201bff2a222b32fac0a2099722	One of the major problems we see today with regard to urban infrastructure is that of sewers, which are used as a pathway to underground waste management facilities. Sewers are a common sight in busy lanes and streets and pose a paramount threat to human, as well as animal life in case they are left open. This may happen due to various reasons (viz. manhole cover theft, negligence etc.). Several …	.		X			I categorized this paper as IoT-based wastewater management and IoT-based water quality monitoring. The paper proposes a Zigbee-based smart sewer system that uses IoT to monitor gas levels and water flow in sewers. The system aims to address the safety concerns and threats to human and animal life caused by open sewers. The use of Zigbee technology in the system is an example of IoT application i…	.
	289	An analytical study and visualisation of human activity and content-based recommendation system by applying ml automation	Dey, A., Rajkumar, R., & Masih, J. (2019). An analytical study and visualisation of human activity and content-based recommendation system by applying ml automation. International Journal of Mechanical and Production Engineering Research and Development, 9(3), 75â€“88. https://doi.org/10.24247/ijmperdjun20198	In this smart emerging world, modern day equipment, like wearable devices, not only provides functionality or advancements in lifestyles but also becoming a trending fashion choice. Most of the devices which are wearable provides basic functionalities like display time or date. But implementation of more smart features like displaying messages, phone call or even medical activity recognition can …	.				X	The paper falls under "IoT-based water quality monitoring" category. Although the paper's main focus is on wearable devices and machine learning methods for activity recognition, it mentions the implementation of secure IoT environment and cloud infrastructure for smart wearable devices. The proposed model also includes the identification of heart-rate data, which can be related to water quality …	.
	290	Social internet of things (SIoT) enabled system model for smart integration of buildingâ€Ÿs energy, water and safety management: Dhaka City, Bangladesh perspective	Samin Rahman, Md., & Humayun Kabir, Md. (2019). Social internet of things (SIoT) enabled system model for smart integration of buildingâ€Ÿs energy, water and safety management: Dhaka City, Bangladesh perspective. AIUB Journal of Science and Engineering, 18(1), 19â€“26. https://www.scopus.com/inward/record.uri?eid=2-s2.0-85090352573&partnerID=40&md5=5783d9fcd5f8716da02c7ab902ad8258	Dhaka, being the largest township of Bangladesh City Buildings is excreted by in-migration, a rapid growth of population, withering of living and infrastructure standard, which eventually is threatening overall sustainability and well beings. Modernization and digitalization of building infrastructure is not only an important step towards resolving the problems but also it will be a facilitator f…	.				X	Paper 115: This paper describes a social internet of things (SIoT) enabled system model for smart integration of buildings energy, water, and safety management, which is not directly related to water or wastewater infrastructure management, hence it falls under the "Not Related" category. However, it includes IoT-based water conservation, which is why it is marked as such.	.
	291	Smart river monitoring and early flood detection system in Japan developed with the EnOcean long range sensor technology	Purkovic, D., Coates, L., Honsch, M., Lumbeck, D., Schmidt, F., & Split, H.-C. T. S. O. Ltd.â€¯; (2019). Smart river monitoring and early flood detection system in Japan developed with the EnOcean long range sensor technology. In G. Petrovic, B. Ivsic, & M. Dadic (Eds.), 2nd International Colloquium on Smart Grid Metrology, SMAGRIMET 2019. Institute of Electrical and Electronics Engineers Inc. ht…	Smart city is a term which is heard very often nowadays. It is a synonym for a variety of IoT solutions integrated into the daily city life, for the benefit of its inhabitants. One of these solutions, presented in this paper, is a river monitoring and early flood detection system. The proposed solution consists of an ultrasonic sensor adapted to the EnOcean solar-powered, long range sensor module…	.	X		X		Paper 116: This paper describes a smart river monitoring and early flood detection system in Japan developed with the EnOcean long-range sensor technology, which falls under "IoT-based water quality monitoring" and "IoT-based water distribution systems" categories.	.
	292	ICS/SCADA device recognition: A hybrid communication-patterns and passive-fingerprinting approach	al Ghazo, A. T., & Kumar, R. (2019). ICS/SCADA device recognition: A hybrid communication-patterns and passive-fingerprinting approach. 2019 IFIP/IEEE Symposium on Integrated Network and Service Management, IM 2019, 19â€“24. https://www.scopus.com/inward/record.uri?eid=2-s2.0-85067038484&partnerID=40&md5=2c5518bd6e7f6e74b0513231182df6a1	The Industrial Control System (ICS) and Supervisory Control and Data Acquisition (SCADA) systems are the backbones for monitoring and supervising factories, power grids, water distribution systems, nuclear plants, and other critical infrastructures. These systems are installed by third party contractors, maintained by site engineers, and operate for a long time. This makes tracing the documentati…	.				X	Explanation: The paper proposes a hybrid approach for recognizing ICS/SCADA devices used in critical infrastructure, including water distribution systems. Although the paper does not directly deal with IoT-based water and wastewater management, it can be categorized under all four categories since it is related to the management of water distribution systems, which are a part of the IoT-based wat…	.
	293	LoRa-based Measurement Station for Water Quality Monitoring: Case of Botanical Garden Pool	Ngom, B., Diallo, M., Gueye, B., Marilleau, N., & Society, I. I. I. and M. (2019). LoRa-based Measurement Station for Water Quality Monitoring: Case of Botanical Garden Pool. 14th IEEE Sensors Applications Symposium, SAS 2019. https://doi.org/10.1109/SAS.2019.8705986	The advent of Internet of Things (IoT) has made easier to build number of applications. In fact, the remote monitoring or sensing has been facilitated by the IoT. A number of sensor nodes with a networking capability can be deployed in order to have an ad hoc or continuous monitoring system. However, physicists at UCAD's Faculty of Science still use traditional means to collect their water qualit…	.	X				Paper 117: This paper describes a LoRa-based measurement station for water quality monitoring: the case of Botanical Garden Pool, which falls under "IoT-based water quality monitoring" category.	.
	294	Smart Village: Solar Based Smart Agriculture with IoT Enabled for Climatic Change and Fertilization of Soil	Maheswari, R., Azath, H., Sharmila, P., & Sheeba Rani Gnanamalar, S. (2019). Smart Village: Solar Based Smart Agriculture with IoT Enabled for Climatic Change and Fertilization of Soil. 5th IEEE International Conference on Mechatronics System and Robots, ICMSR 2019, 102â€“105. https://doi.org/10.1109/ICMSR.2019.8835454	In smart villages, access to sustainable energy services acts as a catalyst for development. Enabling facility of internet connection for the new possibilities of increasing agricultural cultivation with proper information and guidance, access to clean water, sanitation and nutrition, the growth of productive enterprises to boost farmer's income. The development of a country depends on the villag…	.				X	I categorized this paper as "IoT-based water quality monitoring" and "IoT-based water conservation" because the paper describes the use of IoT devices to deliver climate change information to farmers, allowing them to improve their production capacity through proper fertilization of soil. Additionally, the paper discusses the use of IoT devices operated by solar panels or electric supply to balan…	.
	295	Honeypot inside an opc ua wrapper for water pumping stations	Petre, C.-A., & Korodi, A. (2019). Honeypot inside an opc ua wrapper for water pumping stations. 22nd International Conference on Control Systems and Computer Science, CSCS 2019, 72â€“77. https://doi.org/10.1109/CSCS.2019.00020	The honeypot technologies provided several research themes in the past years, primarily for detection and information gathering against external threats. The water infrastructure and generally automation/SCADA systems may be vulnerable to attacks. In case of critical infrastructures, the protection is necessary because an eventual successful attack can cause major damages. The paper presents a so…	.			X		Paper 118: This paper describes a honeypot inside an OPC UA wrapper for water pumping stations, which falls under "IoT-based water distribution systems" category.	.
	296	Initial machine learning framework development of agriculture cyber physical systems	Airlangga, G., & Liu, A. (2019). Initial machine learning framework development of agriculture cyber physical systems. International Conference on Information System, Computer Science and Engineering 2018, ICONISCSE 2018, 1196(1). https://doi.org/10.1088/1742-6596/1196/1/012065	A cyber-physical system (CPS) shows its potential in integrating the computer systems with the physical environment. The progress in such systems has brought large potential to improve human life quality, such as improved health care services, energy consumption and food supply chain system (FSC). In particular, FSC plays an important role in human beings. It comes from the complex agricultural s…	.				X	Explanation: The paper discusses the development of a machine learning framework for agriculture cyber physical systems. Although the paper does not directly focus on water and wastewater networks management, it does mention the potential for improving the quality of food and environment through the fusion of cyber-physical systems with agricultural systems. Additionally, the framework developed …	.
	297	Research on the Internet of Things Platform for Smart and Environmental Protection	Sheng, J., Feng, X., & Section, C. A. for A. I. I. B. (2019). Research on the Internet of Things Platform for Smart and Environmental Protection. 5th IEEE International Conference on Cloud Computing and Intelligence Systems, CCIS 2018, 958â€“962. https://doi.org/10.1109/CCIS.2018.8691352	This article focuses on the research and implementation of an intelligent environmentally IoT platform and intelligently connects traditional environmental protection devices to the IoT Cloud platform. There are different types of environmental protection equipment, such as PM2.5, Pm10, water, sound and gas monitoring equipment. In this paper the environmental protection equipments connect to the…	.				X	I put paper 25 under the category of "IoT-based water quality monitoring" because the paper discusses the implementation of an IoT platform for connecting various types of environmental monitoring devices, including water quality monitoring equipment, to the cloud platform for real-time monitoring and data analysis. However, the paper did not directly discuss IoT-based wastewater management, IoT-…	.
	298	Ransomware Threat and its Impact on SCADA	Javed Butt, U., Abbod, M., Lors, A., Jahankhani, H., Jamal, A., & Kumar, A. (2019). Ransomware Threat and its Impact on SCADA. 12th International Conference on Global Security, Safety and Sustainability, ICGS3 2019. https://doi.org/10.1109/ICGS3.2019.8688327	Modern cybercrimes have exponentially grown over the last one decade. Ransomware is one of the types of malware which is the result of sophisticated attempt to compromise the modern computer systems. The governments and large corporations are investing heavily to combat this cyber threat against their critical infrastructure. It has been observed that over the last few years that Industrial Contr…	.				X	Explanation: This paper is about the impact of ransomware threat on SCADA systems, which are used for controlling and monitoring various industrial processes including water and wastewater management. The paper mentions the use of IoT technologies such as sensors and PLCs in these systems, and highlights the vulnerabilities that cyber criminals can exploit to disrupt their operations. Therefore, …	.
	299	Wireless middleware solutions for smart water metering	Alvisi, S., Casellato, F., Franchini, M., Govoni, M., Luciani, C., Poltronieri, F., Riberto, G., Stefanelli, C., & Tortonesi, M. (2019). Wireless middleware solutions for smart water metering. Sensors (Switzerland), 19(8). https://doi.org/10.3390/s19081853	While smart metering applications have initially focused on energy and gas utility markets, water consumption has recently become the subject of increasing attention. Unfortunately, despite the large number of solutions available on the market, the lack of an open and widely accepted communication standard means that vendors typically propose proprietary data collection solutions whose adoption c…	.			X		Paper 119: This paper describes wireless middleware solutions for smart water metering, which falls under "IoT-based water distribution systems" category.	.
	300	A Blockchain based Secure IoT Solution for the Dam Surveillance	Youssef, S. B. H., Rekhis, S., & Boudriga, N. (2019). A Blockchain based Secure IoT Solution for the Dam Surveillance. 2019 IEEE Wireless Communications and Networking Conference, WCNC 2019, 2019-April. https://doi.org/10.1109/WCNC.2019.8885479	The use of Cloud and Internet of Things (IoT) in monitoring the dam site will offer many benefits. In fact, it is very requisite to periodically monitor the quality and level of water in the reservoir and the weather conditions to predict the input flow into the reservoir. Moreover, it is crucial to monitor the dam structure to acquire health and safety condition of the dam infrastructure in real…	.				X	Explanation: The paper proposes a system architecture that includes Cloud and IoT for the surveillance of a dam site. The system consists of a sensor cloud and an UAV cloud designed for the surveillance of a dam site. The UAV cloud collects sensing data and delivers them to the dam monitoring center, and the system is based on Blockchain technology. While the paper does not focus on water quality…	.
	301	A survey on internet of things based smart, digital green and intelligent campus	Subbarao, V., Srinivas, K., & Pavithr, R. S. (2019). A survey on internet of things based smart, digital green and intelligent campus. 4th International Conference on Internet of Things: Smart Innovation and Usages, IoT-SIU 2019. https://doi.org/10.1109/IoT-SIU.2019.8777476	Internet Of Things known for Global network in the cloud which connects various things through sensors. The IoT is a system that connects various devices which are intelligently communicates with other objects, machines, infrastructures and also environments [1]. This research paper highlights the important components of a model 'Smart and Digital Green Educational Campus'. A smart campus is enab…	.				X	Based on the abstract, the paper falls under all four categories: IoT-based water quality monitoring, IoT-based wastewater management, IoT-based water distribution systems, and IoT-based water conservation. The paper discusses the use of IoT technology to create a Smart and Digital Green Educational Campus, which includes various components such as outdoor lighting, building, lighting, heating, c…	.
	302	Urban underground infrastructure monitoring iot: The path loss analysis	Salam, A., Shah, S., & Society, et al.â€¯; I. C. S. (ComSoc); I. C. E. S. I. R. S. I. S. C. I. S. P. (2019). Urban underground infrastructure monitoring iot: The path loss analysis. 5th IEEE World Forum on Internet of Things, WF-IoT 2019, 398â€“401. https://doi.org/10.1109/WF-IoT.2019.8767358	The extra quantities of wastewater entering the pipes can cause backups that result in sanitary sewer overflows. Urban underground infrastructure monitoring is important for controlling the flow of extraneous water into the pipelines. By combining the wireless underground communications and sensor solutions, the urban underground IoT applications such as real time wastewater and storm water overf…	.		X			Paper 120: This paper describes urban underground infrastructure monitoring IoT: the path loss analysis, which falls under the "IoT-based wastewater management" category. Additionally, it includes IoT-based water conservation, which is why it is marked as such.	.
	303	An efficient irrigation system for agriculture	Rajendrakumar, S., Parvati, V. K., & Rajashekarappa, R. (2019). An efficient irrigation system for agriculture. In J. Raja, S. K. Niranjan, & A. R. Rajini (Eds.), 2018 International Conference On Communication, Computing and Internet of Things, IC3IoT 2018 (pp. 132â€“136). Institute of Electrical and Electronics Engineers Inc. https://doi.org/10.1109/IC3IoT.2018.8668206	The wastage of water without proper knowledge of having irrigation to the crops or plants then we need infrastructure to carry water and even money is also wasted. Automated agricultural watering system saves water by delivering quantity of water requires for the area to irrigate. It also helps to keep the plants in a healthy manner without wastage of water which also saves money. The proposed me…	.	X				1. Paper 121: The paper discusses an efficient irrigation system for agriculture that utilizes IoT sensors to monitor water quality, making it fall under IoT-based water quality monitoring. The system also implements water conservation methods, which places it under IoT-based water conservation as well.	.
	304	Towards fault tolerant fog computing for IoT-based smart city applications	Mohamed, N., Al-Jaroodi, J., Jawhar, I., & UNLV, I. R. 6; I. R. R. I. U. I. of E. and M. (IEM); U. of E. and M. (UEM); (2019). Towards fault tolerant fog computing for IoT-based smart city applications. In S. Chakrabarti & H. N. Saha (Eds.), 9th IEEE Annual Computing and Communication Workshop and Conference, CCWC 2019 (pp. 752â€“757). Institute of Electrical and Electronics Engineers Inc. https:…	Fog computing can provide many services to support IoT-based smart city applications. Fog computing usually consists of multiple nodes that are distributed across a smart city to enable IoT-based smart city applications such as intelligent transportation, smart energy, smart water, smart health, smart infrastructure monitoring, and smart environmental monitoring. The Fog platform will allow execu…	.				X	Explanation: The paper discusses the issues of reliability and fault tolerance for fog computing supporting IoT-based smart city applications, including smart water management. The authors highlight that fog computing can provide services to support IoT-based smart water management applications such as smart water distribution and environmental monitoring, which fall under the categories of IoT-b…	.
	305	Cyber Reliability, Resilience, and Safety of Physical Infrastructures	Timashev, S. A. (2019). Cyber Reliability, Resilience, and Safety of Physical Infrastructures. 4th International Conference on Safety Problems of Civil Engineering Critical Infrastructures, Safety 2018, 481(1). https://doi.org/10.1088/1757-899X/481/1/012009	The paper considers the problem of constructing a full group of failure scenarios for physical infrastructures when subjected to cyber attacks (CAs). Physical infrastructures actually are systems of systems, or network of networks [1]. The main idea of the research rests on the assumption, that in order to damage any physical infrastructure by a cyber attack, it has to be able to produce a powerf…	.				X	Explanation: The paper discusses the cyber reliability, resilience, and safety of physical infrastructures, including water supply and disposal systems, which are elements of the enterprise IoT or IoT. The paper specifically mentions water supply and disposal (waste) systems as part of the infrastructure that can be affected by cyber attacks. Therefore, the paper falls under all four categories o…	.
	306	Smart Irrigation System Using Machine Learning and IOT	Kondaveti, R., Reddy, A., Palabtla, S., & Tetcos, A. I. P. L. E. E. K. T. (2019). Smart Irrigation System Using Machine Learning and IOT. 2019 International Conference on Vision Towards Emerging Trends in Communication and Networking, ViTECoN 2019. https://doi.org/10.1109/ViTECoN.2019.8899433	In the urban areas, such as developed cities, the citizens have all the basic amenities like Electricity supply with minimal number of power cuts, Food supply, comparatively proper roads and infrastructure of buildings, etc. But same is not the case with rural areas, where majority of villages suffer electricity shortage, agricultural issues, improper supply and distribution of water for various …	.				X	Explanation: The paper describes the development of a smart irrigation system for agriculture using machine learning and IoT. It directly uses IoT for water conservation and also mentions the use of a rainfall prediction algorithm to determine crop suitability. Therefore, the paper falls under the categories of IoT-based water conservation and IoT-based water quality monitoring. The paper does no…	.
	307	Drinking water monitoring in mosul city using IoT	Al-Khashab, Y., Daoud, R., Majeed, M., & Yasen, M. (2019). Drinking water monitoring in mosul city using IoT. 1st IEEE International Conference on Computing and Information Science and Technology and Their Applications, ICCISTA 2019. https://doi.org/10.1109/ICCISTA.2019.8830662	Mosul is one of the cities of Iraq, which was attacked by fierce terrorist organizations called ISIS since 2014-2017 destroyed all the infrastructure of the city. After liberation the city from ISIS by the Iraqi forces had to return to normal life and repair all the destroyed topic of the city. The most important of these topics is for return drinking water and elimination of water pollution by t…	.	X				2. Paper 122: The paper presents a system that monitors the quality of drinking water in Mosul city using IoT sensors, making it fall under IoT-based water quality monitoring.	.
	308	IoT Based Water Management Using HC-12 and Django	Jose, D. P., Dsouza, A. L., Thomas, A. A., & Daniel, D. (2019). IoT Based Water Management Using HC-12 and Django. 2019 International Conference on Data Science and Communication, IconDSC 2019. https://doi.org/10.1109/IconDSC.2019.8816917	Water is one of the important needs for a human being. Life on Earth is possible due to the presence of water on its surface. Even though 71% of Earth's surface is covered with water, the availability of water in certain areas is very less. So, the people in these areas must reserve water for ensuring a steady availability. These problems can be rectified with the help of Internet of Things (IOT)…	.			X		3. Paper 123: The paper describes an IoT-based water management system that uses HC-12 and Django. While the paper does not provide details on the specific area of water management, it focuses on water conservation and falls under IoT-based water conservation.	.
	309	A survey on social media analytics for smart city	Yenkar, P., & Sawarkar, S. D. (2019). A survey on social media analytics for smart city. 2nd International Conference on I-SMAC (IoT in Social, Mobile, Analytics and Cloud), I-SMAC 2018, 87â€“93. https://doi.org/10.1109/I-SMAC.2018.8653707	Urbanization offers opportunities in terms of economic and social life but as the population increases, urban issues like traffic jam, pollution, overcrowding, resource management like water, energy are also increased. Continuous monitoring of city's infrastructure and automated collection of daily incidents are required to improve quality of life of citizens. Every day, vast no. of citizens are …	.				X	I put paper 37 under all four IoT-based water management categories because the paper discusses the use of social media analytics for smart city implementation, which includes resource management like water and wastewater. While the paper does not directly mention the use of IoT in water and wastewater management, it indirectly discusses the potential for IoT to be used in these areas through the…	.
	310	Protecting smart grid and advanced metering infrastructure	Salpekar, M. (2019). Protecting smart grid and advanced metering infrastructure. 2nd International Conference on I-SMAC (IoT in Social, Mobile, Analytics and Cloud), I-SMAC 2018, 22â€“26. https://doi.org/10.1109/I-SMAC.2018.8653793	Smart grids and Advanced Metering Infrastructure (hereafter referred to as system) are envisaged to be next steps in power distribution and transmission. The system will not only ensure efficient power supply but also aims to reduce power thefts and fault detections in time. However, the system is susceptible to cyber-attack and tampering. The paper aims to provide some solutions to protect the s…	.				X	Explanation: This paper discusses protecting the smart grid and advanced metering infrastructure using cryptography based solutions. Although it does not directly deal with water or wastewater networks, it can be extended to protect other utilities such as gas and water. The suggested solutions can be applied to IoT-based water quality monitoring, IoT-based wastewater management, IoT-based water …	.
	311	Design and evaluation of iot-enabled instrumentation for a soil-bentonite slurry trench cutoffwall	Marchiori, A., Li, Y., & Evans, J. (2019). Design and evaluation of iot-enabled instrumentation for a soil-bentonite slurry trench cutoffwall. Infrastructures, 4(1). https://doi.org/10.3390/infrastructures4010005	In this work, we describe our approach and experiences bringing an instrumented soil-bentonite slurry trench cutoff wall into a modern IoT data collection and visualization pipeline. Soil-bentonite slurry trench cutoff walls have long been used to control ground water flow and contaminant transport. A Raspberry Pi computer on site periodically downloads the sensor data over a serial interface fro…	.				X	I categorize this paper under "IoT-based water quality monitoring" because the paper describes the implementation of IoT-enabled instrumentation for a soil-bentonite slurry trench cutoff wall, which is used to control groundwater flow and contaminant transport. The paper describes the use of a Raspberry Pi computer on-site to download sensor data and transmit it wirelessly to a gateway computer u…	.
	312	Modeling of sewerage system linking UML, automata and TLA+	Latif, S., Rehman, A., & Zafar, N. A. (2019). Modeling of sewerage system linking UML, automata and TLA+. 2018 International Conference on Computing, Electronic and Electrical Engineering, ICE Cube 2018. https://doi.org/10.1109/ICECUBE.2018.8610971	Internet of things (IoT) means interconnection of heterogeneous nodes implemented in order to sense input data, interpretation, processing and output within a network. The smart environment is transformed by embedding heterogeneous devices into real scenarios. In the existing work, IoT infrastructure is rarely implemented in real time scenarios because of lack of knowledge, infrastructure handlin…	.				X	I placed paper 40 under the category of IoT-based water quality monitoring. Although the paper focuses on the modeling of a sewerage system using UML, automata, and TLA+ instead of directly implementing IoT in water and wastewater infrastructure, it does mention IoT and its potential to interconnect heterogeneous nodes for sensing input data, interpretation, processing, and output within a networ…	.
	313	INDUSTRY 4.0: Innovative solutions for the water industry	Alabi, M., Telukdarie, A., & Rensburg, N. J. v. (2019). INDUSTRY 4.0: Innovative solutions for the water industry. In E. Schott, H. Keathley, & C. Krejci (Eds.), 2019 International Annual Conference of the American Society for Engineering Management and 40th Meeting Celebration: A Systems Approach to Engineering Management Solutions, ASEM 2019. American Society for Engineering Management. https:/…	Most water service providers are increasingly utilizing capacities of Internet of Things and Big Data for leakage detection, water metering, planning, monitoring and distribution. The era of Industry 4.0 has brought about different innovative solutions across various industrial sectors. Internet of Things (IoT) provides new solutions to the water industry, improving water management, and reducing…	.			X		4. Paper 124: The paper proposes innovative solutions for the water industry, with a specific focus on Industry 4.0. The paper discusses various applications of IoT in water distribution systems and water conservation methods, which makes it fall under IoT-based water distribution systems and IoT-based water conservation.	.
	314	Jamming-resilient control and communication framework for cyber physical systems	TomiÄ‡, I., Breza, M., & McCann, J. A. (2019). Jamming-resilient control and communication framework for cyber physical systems. Living in the Internet of Things, IoT 2019, 2019(CP756). https://doi.org/10.1049/cp.2019.0132	The control and monitoring of large infrastructure installations is becoming smarter, cheaper to run and easier to manage through the use of wireless sensor and actuator networks (WSANs). Cyber Physical Systems (CPSs) are the combination of cyber sensing via WSANs and physical control. The problem with the use of WSANs in CPSs is that they make the whole system being controlled exposed to the wor…	.				X	5. Paper 125: The paper proposes a jamming-resilient control and communication framework for cyber-physical systems. Although the paper does not directly relate to water management or IoT-based water systems, it is included under Not Related.	.
	315	IoT sensors in aquaculture-barriers and facilitators for sustainability in Brazilian context	Ramanathan, R., Duan, Y., Ajmal, T., Dong, F., Ransbeeck, S. v, Valverde, J. M. M., Valverde, S. B., & Windsor, E. P. B. worldwide; S. S. U. of D. U. of. (2019). IoT sensors in aquaculture-barriers and facilitators for sustainability in Brazilian context. 4th North American IEOM Conference. IEOM 2019, 465â€“467. https://www.scopus.com/inward/record.uri?eid=2-s2.0-85079279795&partnerID=40&md5=8f77…	The UNEP has identified Artisanal Fisheries (AF) as the most important sector for meeting the twin needs of economic development and environmental sustainability. During 2004-14, fish exports from Brazil declined from 107,000 tons to 34,000 tons while fish imports grew from 158,000 tons to 403,000 tons due to low productivity of Brazilian AFs. Hence it is important to understand opportunities for…	.	X				6. Paper 126: The paper presents a study on the use of IoT sensors in aquaculture and discusses the barriers and facilitators for sustainability in the Brazilian context. As the paper falls under IoT-based water quality monitoring and IoT-based water conservation, it is placed under these categories.	.
	316	LPWAN dedicated low power and providing high reliability IoT-DMS design and manufacture	Jang, M., Lee, K., & Ryu, G.-S. (2019). LPWAN dedicated low power and providing high reliability IoT-DMS design and manufacture. Journal of Advanced Research in Dynamical and Control Systems, 11(Special Issue 7), 1762â€“1766. https://www.scopus.com/inward/record.uri?eid=2-s2.0-85078625672&partnerID=40&md5=e5e49dddaa3142dafd5d0daea7488655	Designed and manufactured for LoRaWANIoT-DMS, which is suitable for remote wireless wide area sensor network system and has high reliability and low power consumption. Wireless networks are possible and have improved communication distances and terminal battery life over existing products.The developed IoT-DMS is designed for general purpose for easy access to your market and supports various con…	.				X	Explanation: The paper discusses the design and manufacturing of an IoT device for remote wireless sensor network systems. Although the paper does not explicitly mention water and wastewater management, the developed IoT device can be applied in various industries, including water infrastructure industries. Therefore, we can assume that the device can be used for IoT-based water quality monitorin…	.
	317	Setting the foundational blocks for smart water infrastructure at DC water	Mulcare, M., & Woldemariam, E. (2019). Setting the foundational blocks for smart water infrastructure at DC water. 92nd Annual Water Environment Federationâ€™s Technical Exhibition and Conference, WEFTEC 2019, 4598â€“4611. https://www.scopus.com/inward/record.uri?eid=2-s2.0-85075014311&partnerID=40&md5=0d4ce6f0968370c5ebf4b30db368528d	DC Water sees smart water infrastructure as an essential component to optimally manage its water and sewer networks. To begin the digital transformation of its systems, the Water and Sewer Sensor Program (WaSSP) was launched in 2017. WaSSP includes numerous water distribution, water quality, sewer collection, and hydraulic modeling objectives. A detailed roadmap was created as part of the program…	.			X		7. Paper 127: The paper discusses the foundational blocks for smart water infrastructure at DC water. While it does not provide detailed information on the specific IoT-based water systems used, it focuses on water distribution systems and falls under IoT-based water distribution systems.	.
	318	Sparks-Edge: Analytics for intelligent city water metering	Amaxilatis, D., Chatzigiannakis, I., Tselios, C., & Tsironis, N. (2019). Sparks-Edge: Analytics for intelligent city water metering. In E. C. Strinati, D. Charitos, I. Chatzigiannakis, P. Ciampolini, F. Cuomo, D. L. P, D. Gavalas, S. Hanke, A. Komninos, & G. Mylonas (Eds.), 2019 Joint Poster and Workshop Sessions of AmI, AmI 2019 and 2019 European Conference on Ambient Intelligence (Vol. 2492). C…	Smart Meter infrastructures are emerging systems that measure, collect, and analyze utility data and communicate with the networkâ€™s backbone on a fixed schedule. Such infrastructures are a vital part towards real Intelligent Cities. In this article we propose an edge-processing oriented Internet of Things architecture for smart meter networks that helps reduce data communication while keeping t…	.			X		8. Paper 128: The paper proposes a system for intelligent city water metering and analytics, which falls under IoT-based water distribution systems.	.
	319	Bayesian modeling updating of miter gates with uncertain boundary conditions	Gomez, F., Spencer Jr., B. F., Smith, M. D., & Research, A. F. O. of S. R. A. B. et al.â€¯; M. O. of N. (2019). Bayesian modeling updating of miter gates with uncertain boundary conditions. In C. F.-K., A. Guemes, & F. Kopsaftopoulos (Eds.), 12th International Workshop on Structural Health Monitoring: Enabling Intelligent Life-Cycle Health Management for Industry Internet of Things (IIOT), IWSHM …	Navigational locks are critical infrastructure components; however, traditional inspection of the lock components, requires closing and dewatering the lock to perform visual inspections, which stops fluvial traffic and consequently presents significant economic losses. Moreover, the gates are typically the critical component in the navigational locks; due to impact or environmental deterioration,…	.				X	Explanation: Paper 50 discusses Bayesian modeling updating of miter gates in navigational locks with uncertain boundary conditions. Although it does not directly address water and wastewater infrastructures and networks management, it does provide insights into structural health monitoring of water-related infrastructure. Since it falls under none of the four categories directly related to IoT-ba…	.
	320	IoT data-based architecture on OpenStack for smart city	Belahsen, C. A., Lyhyaoui, A., & Boufardi, N. (2019). IoT Data-Based Architecture on OpenStack for Smart City. In Advanced Intelligent Systems for Sustainable Development (AI2SD’2018) Volume 5: Advanced Intelligent Systems for Computing Sciences (pp. 567-577). Springer International Publishing.	The integration of the Internet of things (IoT) with the power of Cloud Computing and the Big Data insight to build a Smart City is absolutely the main aim of this Article. From the point of view of most governments, adopting a Smart City concept in their cities by implementing Big Data applications, offers the potential for cities to obtain and reach the required level of development and sustain…	.				X	Explanation: The paper proposes an IoT-based architecture on OpenStack for Smart City, which includes the implementation of sensors for various purposes, including smart water sensors. The paper also mentions the use of Big Data applications for the management, analysis, and processing of data collected from sensors. Therefore, the paper falls under all four categories of IoT-based water quality …	.
	321	Gateway sink placement for sensor node grid distribution in LoRa smart city networks	Zainal, N. A. B., Habaebi, M. H., Chowdhury, I. J., Rafiqul Islam, M., & Daoud, J. I. (2019). Gateway sink placement for sensor node grid distribution in LoRa smart city networks. Indonesian Journal of Electrical Engineering and Computer Science, 14(2), 834â€“842. https://doi.org/10.11591/ijeecs.v14.i2.pp834-842	Low Power Wide Area Network (LPWAN) is a type of wireless communication network designed to allow long range communications at a low bit rate among things (connected objects), such as sensors operated on a battery. It is a new technology that operates in unauthorized spectrum which designed for wireless data communication [1]. It is used in Internet of Thing (IoT) applications and M2M communicati…	.			X		9. Paper 129: The paper describes an IoT-based water quality monitoring system for smart farming. The system focuses on water conservation methods, which makes it fall under IoT-based water conservation.	.
	322	Design and implementation of a DASH7-based wireless sensor network for green infrastructure	Le, T., Wang, L., & Haghani, S. (2019). Design and implementation of a DASH7-based wireless sensor network for green infrastructure. In G. F. Scott & W. Hamilton (Eds.), 19th World Environmental and Water Resources Congress 2019: Emerging and Innovative Technologies and International Perspectives (pp. 118â€“129). American Society of Civil Engineers (ASCE). https://doi.org/10.1061/9780784482322.012	Globally, a dramatic demographic shift towards urbanization is occurring. Between 2000 and 2050, the proportion of people living in urban areas is projected to rise from 46.6% to 69.6%. Urbanization poses problems through effects such as environmental pollution, accidents, heat island effects, and climate change. With the rapid urban growth and development, the quality of green space available ha…	.				X	Explanation: This paper focuses on the design and implementation of a wireless sensor network for monitoring green infrastructure in smart cities. The WSN system is based on the DASH7 protocol, and integrates a variety of sensors including soil moisture, temperature, light, humidity, and pressure. Although the paper does not directly use IoT for water and wastewater networks management, it does r…	.
	323	Smart Rain Barrels: Advanced LID Management Through Measurement and Control	Oberascher, M., Zischg, J., Palermo, S. A., Kinzel, C., Rauch, W., & Sitzenfrei, R. (2019). Smart rain barrels: Advanced LID management through measurement and control. In New Trends in Urban Drainage Modelling: UDM 2018 11 (pp. 777-782). Springer International Publishing.	Rain barrels are micro-scale applications which are used as temporary storage and for rainwater harvesting. They can be easily implemented into existing stormwater infrastructure. Recent advances in the field of Internet of Things (IoT) have opened up new possibilities for real-time monitoring and control of such structures, that enable the reduction of urban flooding or combined sewer overflows.…	.		X	X		10. Paper 130: The paper presents a system that monitors wastewater management using IoT, making it fall under IoT-based wastewater management. The system also implements water distribution systems, which places it under IoT-based water distribution systems.	.
	324	Trends in metering potable water	Maiolo, M., Carini, M., Capano, G., Pantusa, D., & Iusi, M. (2019). Trends in metering potable water. Water Practice and Technology, 14(1), 1â€“9. https://doi.org/10.2166/wpt.2018.120	Sustainable management of drinking water distribution systems requires information on the operating status of system components to identify the best operational management measures. The ability to acquire information on tank levels, pipeline flow and real-time pressure offers an efficient and cost-effective management perspective, and enables wider monitoring, which can improve (physical) securit…	.				X	Paper 131: The paper discusses the trends in metering potable water, which falls under the category of water infrastructure management. Although the paper does not directly use IoT, it mentions the importance of using IoT technologies in the future, making it indirectly related to the IoT-based water quality monitoring category. It is also not directly related to the other categories, so it falls…	.
	325	Synchronous LoRa Mesh Network to Monitor Processes in Underground Infrastructure	Ebi, C., Schaltegger, F., Rust, A., & Blumensaat, F. (2019). Synchronous LoRa Mesh Network to Monitor Processes in Underground Infrastructure. IEEE Access, 7, 57663â€“57677. https://doi.org/10.1109/ACCESS.2019.2913985	Collecting precise real-time information on urban drainage system performance is essential to identify, predict, and manage critical loading situations, such as urban flash floods and sewer overflows. Although emerging low-power wireless communication techniques allow efficient data transfers with great above-ground performance, for underground or indoor applications in a large coverage range are…	.		X	X		Paper 132: The paper proposes a LoRa mesh network to monitor processes in underground infrastructure, which falls under the category of water distribution systems. It directly uses IoT, making it an IoT-based water distribution system.	.
	326	Securing Emergent IoT Applications	Kasinathan, P., & Cuellar, J. (2019). Securing emergent IoT applications. Engineering Trustworthy Software Systems: 4th International School, SETSS 2018, Chongqing, China, April 7–12, 2018, Tutorial Lectures 4, 99-147.	Attacks on IoT, Cyber-Physical-Systems (CPS), and other computing systems are evolving rapidly. As a result, IoT devices used in critical infrastructures such as energy, health-care, and water supply systems are vulnerable to attacks. A successful attack on such safety-critical infrastructures may have life-threatening consequences. On the other hand, existing security mechanisms are not enough t…	.				X	The paper discusses the need for better security mechanisms and tools to manage and protect IoT devices used in critical infrastructures such as water supply systems from malicious use. It presents a framework to negotiate, compromise, and inter-operate between different services or platforms to fulfill a purpose. Additionally, it presents a Petri Net based workflow specification and enforcement …	.
	327	Planning for a prosumer future: The case of central park, sydney	McLean, L., & Roggema, R. (2019). Planning for a prosumer future: The case of central park, sydney. Urban Planning, 4(1), 172â€“186. https://doi.org/10.17645/up.v4i1.1746	Rapid convergence of utility and mobility solutions enabled by data and the Internet of Things is future-proofing economies around the world, delivering liveability, sustainability and resilience, and importantly decreasing pressure on utility bills and infrastructure costs. Australians cannot miss out on the many benefits brought to families and businesses by the digitisation of infrastructure a…	.				X	Explanation: This paper discusses the future of infrastructure and services, including water and wastewater management, enabled by the convergence of utility and mobility solutions enabled by data and IoT. The paper specifically mentions the flows of water and energy in an urban infill development in Sydney, showcasing enhanced sustainability, liveability, and resilience. The paper also mentions …	.
	328	Is DNS Ready for ubiquitous internet of things?	Yan, Z., Li, H., Zeadally, S., Zeng, Y., & Geng, G. (2019). Is DNS ready for ubiquitous Internet of Things?. IEEE Access, 7, 28835-28846.	The vision of the Internet of Things (IoT) covers not only the well-regulated processes of specific applications in different areas but also includes ubiquitous connectivity of more generic objects (or things and devices) in the physical world and the related information in the virtual world. For example, a typical IoT application, such as a smart city, includes smarter urban transport networks, …	.				X	Explanation: The paper "Is DNS Ready for ubiquitous internet of things?" discusses the challenges and requirements of naming and naming resolution in the context of the Internet of Things (IoT). While the paper is not directly related to water or wastewater networks management, it is relevant to the four categories of IoT-based water quality monitoring, IoT-based wastewater management, IoT-based …	.
	329	Improving SIEM for critical SCADA water infrastructures using machine learning	Hindy, H., Brosset, D., Bayne, E., Seeam, A., & Bellekens, X. (2019). Improving SIEM for critical SCADA water infrastructures using machine learning. In Computer Security: ESORICS 2018 International Workshops, CyberICPS 2018 and SECPRE 2018, Barcelona, Spain, September 6–7, 2018, Revised Selected Papers 2 (pp. 3-19). Springer International Publishing.	Network Control Systems (NAC) have been used in many industrial processes. They aim to reduce the human factor burden and efficiently handle the complex process and communication of those systems. Supervisory control and data acquisition (SCADA) systems are used in industrial, infrastructure and facility processes (e.g. manufacturing, fabrication, oil and water pipelines, building ventilation, et…	.				X	Paper 133: The paper discusses improving SIEM for critical SCADA water infrastructures using machine learning. Although it indirectly relates to water infrastructure management, it does not directly use IoT, so it falls under the Not Related category.	.
	330	Low-cost flow sensors: Making smart water monitoring technology affordable	Fell, J., Pead, J., & Winter, K. (2019). Low-cost flow sensors: Making smart water monitoring technology affordable. IEEE Consumer Electronics Magazine, 8(1), 72â€“77. https://doi.org/10.1109/MCE.2018.2867984	High-quality water-related data are fundamental to water-resource planning, water and sanitation infrastructure design, and scientific research. However, high-resolution smart water-monitoring equipment can be extremely costly and vulnerable to vandalism and theft. Consequently, developing countries struggle to acquire and maintain high-quality monitoring instruments. Thus, water data in those co…	.			X		Paper 134: The paper discusses low-cost flow sensors for smart water monitoring technology, which falls under the category of water conservation. It directly uses IoT, making it an IoT-based water conservation paper.	.
	331	Efficient Real-Time Decision Making Using Streaming Data Analytics in IoT Environment	Valliappan, S., Bagavathi Sivakumar, P., & Ananthanarayanan, V. (2019). Efficient real-time decision making using streaming data analytics in IoT environment. In International Conference on Advanced Computing Networking and Informatics: ICANI-2018 (pp. 165-173). Springer Singapore.	Setting up and managing Internet of things environment possess challenges like capturing, storing, mining, and processing of massive high-speed data streams generated by various sensors and computing devices. In this paper, the focus is on decision support systems incorporating cloud infrastructure and streaming data analytics to provide efficient decision making at the point of care in smarter e…	.				X	Paper 135: The paper discusses efficient real-time decision-making using streaming data analytics in an IoT environment. Although it indirectly relates to water infrastructure management, it does not directly use IoT, so it falls under the Not Related category.	.
	332	A Real-time Linked Dataspace for the Internet of Things: Enabling â€œPay-As-You-Goâ€ Data Management in Smart Environments	Curry, E., Derguech, W., Hasan, S., Kouroupetroglou, C., & ul Hassan, U. (2019). A Real-time Linked Dataspace for the Internet of Things: Enabling â€œPay-As-You-Goâ€ Data Management in Smart Environments. Future Generation Computer Systems, 90, 405â€“422. https://doi.org/10.1016/j.future.2018.07.019	As smart environments move from a research vision to concrete manifestations in real-world enabled by the Internet of Things, they are encountering a number of very practical challenges in data management in terms of the flexibility needed to bring together contextual and real-time data, the interface between new digital infrastructures and existing information systems, and how to easily share da…	.				X	Based on the abstract, paper 63 discusses the implementation of a real-time linked dataspace for data management within smart environments, including smart water and energy management. The paper introduces the concept of pay-as-you-go data management for smart environments and presents a dataspace query service for real-time data streams and entities. The paper demonstrates the validation of the …	.
	333	Smart Clothline System Based on Internet of Thing (IoT)	Yusoff, Z. M., Muhammad, Z., Abidin, A. F. Z., Dalila, K. N., Razali, N. F., Majid, M. A., & Hasan, K. K. (2018). Smart Clothline System Based on Internet of Thing (IoT). In MATEC Web of Conferences (Vol. 248, p. 02002). EDP Sciences.	Along with the growth of economic and infrastructure development, the level of invention or technologies is increasing steadily. These modern technology or invention is very useful to help people ease their daily life. Nowadays, there are many new inventions that have been developed due to the people demands. This is supported by the development of new technologies. This is because people nowaday…	.				X	Explanation: The paper describes an IoT-based system for a smart clothesline to avoid clothes from getting wet during rainy days. The system uses sensors to detect rain, temperature, humidity, and light intensity, and sends notifications to the user's smartphone. While the paper does not directly discuss water and wastewater infrastructures and networks management, it falls under the category of …	.
	334	Leveraging the internet of things for smart waters: Motivation, enabling technologies and deployment strategies for Pakistan	Safdar, S., Mohsin, M., Khan, L. A., & Iqbal, W. (2018, October). Leveraging the internet of things for smart waters: Motivation, enabling technologies and deployment strategies for Pakistan. In 2018 IEEE SmartWorld, Ubiquitous Intelligence & Computing, Advanced & Trusted Computing, Scalable Computing & Communications, Cloud & Big Data Computing, Internet of People and Smart City Innovation (Smar…	With a continuous strive to develop smarter and more integrated systems, the Internet of Things (IoT) is evolving into a well-established and widely-adopted technology, nurturing many success stories and promises to deliver. The IoT systems foster digital-physical integrations, thus offering many innovative use-case scenarios for smarter communities by facilitating efficient management and intell…	.				X	Explanation: This paper discusses the use of IoT technology for smart management of water distribution, consumption, and quality monitoring in Pakistan, which falls under the category of IoT-based water distribution systems, IoT-based water conservation, and IoT-based water quality monitoring. Therefore, these categories are marked with an "x." However, the paper does not mention wastewater manag…	.
	335	IIoT Cybersecurity Risk Modeling for SCADA Systems	Falco, G., Caldera, C., & Shrobe, H. (2018). IIoT Cybersecurity Risk Modeling for SCADA Systems. IEEE Internet of Things Journal, 5(6), 4486â€“4495. https://doi.org/10.1109/JIOT.2018.2822842	Urban critical infrastructure such as electric grids, water networks, and transportation systems are prime targets for cyberattacks. These systems are composed of connected devices which we call the Industrial Internet of Things (IIoT). An attack on urban critical infrastructure IIoT would cause considerable disruption to society. Supervisory control and data acquisition (SCADA) systems are typic…	.				X	Explanation: The paper does not directly deal with IoT-based water and wastewater infrastructures and networks management. Instead, it focuses on the cybersecurity risk modeling of supervisory control and data acquisition (SCADA) systems that are used to control industrial internet of things (IIoT) for urban critical infrastructure. Therefore, the paper falls under all categories except "Not Rela…	.
	336	Agile IoT for Critical Infrastructure Resilience: Cross-Modal Sensing As Part of a Situational Awareness Approach	Russell, L., Goubran, R., Kwamena, F., & Knoefel, F. (2018). Agile IoT for Critical Infrastructure Resilience: Cross-Modal Sensing As Part of a Situational Awareness Approach. IEEE Internet of Things Journal, 5(6), 4454â€“4465. https://doi.org/10.1109/JIOT.2018.2818113	Internet of Things (IoT) continues proliferation. Hospitals, energy industry, power grid, food and water, transportation, etc., are critical asset resources. Critical systems must remain steadfast and reliable. This IoT evolution, sometimes termed, industrial IoT, is significant for critical infrastructure. In harsh climates, human lives can depend daily on these systems functioning well. Better …	.				X	Explanation: Based on the abstract, the paper discusses the use of agile IoT for critical infrastructure resilience, which includes various industries such as food and water, transportation, and energy. The proposed method involves using signal processing middleware to enable sensors commonly deployed in critical infrastructure to be repurposed for sensing additional parameters or adding parallel…	.
	337	Synergistic Security for the Industrial Internet of Things: Integrating Redundancy, Diversity, and Hardening	Laszka, A., Abbas, W., Vorobeychik, Y., & Koutsoukos, X. (2018). Synergistic Security for the Industrial Internet of Things: Integrating Redundancy, Diversity, and Hardening. 1st IEEE International Conference on Industrial Internet, ICII 2018, 153â€“158. https://doi.org/10.1109/ICII.2018.00025	As the Industrial Internet of Things (IIot) becomes more prevalent in critical application domains, ensuring security and resilience in the face of cyber-attacks is becoming an issue of paramount importance. Cyber-attacks against critical infrastructures, for example, against smart water-distribution and transportation systems, pose serious threats to public health and safety. Owing to the severi…	.				X	Explanation: Based on the abstract, the paper discusses a multi-pronged approach for designing secure and resilient IoT systems, which integrates redundancy, diversity, and hardening techniques. A case study in water-distribution systems is presented to demonstrate the applicability of their framework. While the paper does not focus on IoT-based water quality monitoring, wastewater management, or…	.
	338	Smart water distribution network solution for smart cities: Indian scenario	Mohanasundaram, S. v, Joyce, A., Sri Naresh, K., Gokulkrishnan, G., Kale, A., Dwarakanath, T., & Haribabu, P. (2018). Smart water distribution network solution for smart cities: Indian scenario. 2018 Global Internet of Things Summit, GIoTS 2018. https://doi.org/10.1109/GIOTS.2018.8534524	In this work, we propose a smart solution for a city wide water distribution network for Indian scenario. A water distributionnetwork is a hydraulic infrastructure that conveys water from the source to the end users and it consists of elements such as pipes,valves, pumps, ground level and elevated storage tanks and reservoirs. Traditional water networks address the water demand of a cityonly base…	.			X		Paper 136: The paper proposes a smart water distribution network solution for smart cities in India, which falls under the categories of water distribution systems and water conservation. It directly uses IoT, making it an IoT-based water distribution system and IoT-based water conservation paper.	.
	339	A proposal for server-less cloud-based infrastructure for a smart metering system in the Kingdom of Bahrain	Al-Naser, A., & El-Medany, W. M. (2018). A proposal for server-less cloud-based infrastructure for a smart metering system in the Kingdom of Bahrain. 2018 International Conference on Innovation and Intelligence for Informatics, Computing, and Technologies, 3ICT 2018. https://doi.org/10.1109/3ICT.2018.8855729	Replacing the normal electricity and water meters with smart ones is one of the major transformations toward smart cities in the Kingdom of Bahrain. This transformation eliminates the need for manual reading and the estimated monthly billing values. The current approach of the system infrastructure is having the smart meters connected to a network and communicates with a server which reads the da…	.				X	Explanation: The paper does not directly discuss IoT-based water or wastewater management or conservation, but it proposes a server-less cloud-based infrastructure for a smart metering system in Bahrain. The proposed system aims to improve the efficiency and security of the smart metering system by minimizing computing requirements and enhancing security. Since the paper talks about using IoT-bas…	.
	340	Data security of smart cities	Ainane, N., Ouzzif, M., & Bouragba, K. (2018). Data security of smart cities. 3rd International Conference on Smart City Applications, SCA 2018. https://doi.org/10.1145/3286606.3286866	The smart city is a new concept of urban development. It is about improving the life quality of city dwellers by making the city more adaptive and efficient, using new technologies that rely on an ecosystem of objects and services. The scope covering this new mode of city management includes: public infrastructures (buildings, street furniture, home automation, etc.), networks (water, electricity…	.				X	I put this paper under all four categories of IoT-based water management because although the paper does not explicitly mention water management, it discusses the concept of the smart city and the importance of addressing security issues in the data exchange flows between different components of the smart city, including networks such as water, electricity, gas, and telecoms. As a result, the pap…	.
	341	Intelligent hospitals based on IOT	Iqbal, U., Dar, M. A., & Bukhari, S. N. (2018). Intelligent hospitals based on IOT. In P. L. N. Ramesh & M. Moorthi (Eds.), 4th IEEE International Conference on Advances in Electrical and Electronics, Information, Communication and Bio-Informatics, AEEICB 2018. Institute of Electrical and Electronics Engineers Inc. https://doi.org/10.1109/AEEICB.2018.8480947	Ambient Intelligence (AmI) is the technology appropriate for modern buildings, homes and public infrastructure. The WSN is recognized as one of the technological corner stone of AmI. This paper proposes the design of a WSN based multi-Communication standard network for the intelligent monitoring of the fragile hospital environment. The proposed network includes sensor nodes to monitor air quality…	.				X	Explanation: Paper 72 proposes the design of a WSN-based multi-communication standard network for the intelligent monitoring of the fragile hospital environment. The proposed network includes sensor nodes to monitor air quality, water quality, and crowd inflow inside various hospital buildings. The design integrates WSN with packet-switched networks/web service communication into a knowledge and …	.
	342	Underground infrastructure management system using internet of things wireless transmission technology	Yamaguchi, Y., Fujino, Y., Katsuda, H., Nakano, M., Fukumoto, H., Teruhi, S., Akabane, K., & Yoshino, S. (2018). Underground infrastructure management system using internet of things wireless transmission technology. IEICE Transactions on Electronics, E101C(10), 727â€“733. https://doi.org/10.1587/transele.E101.C.727	This paper presents a water leakage monitoring system that gathers acoustic data of water pipes using wireless communication technology and identifies the sound of water leakage using machine leaning technology. To collect acoustic data effectively, this system combines three types of data-collection methods: drive-by, walk-by, and static. To design this system, it is important to ascertain the w…	.			X		Paper 137: The paper proposes an underground infrastructure management system using IoT wireless transmission technology, which falls under the category of water distribution systems. It directly uses IoT, making it an IoT-based water distribution system.	.
	343	Smart Power Meter for the IoT	Carratu, M., Ferro, M., Pietrosanto, A., Paciello, V., & (IEEE), I. I. E. S. (IES); I. T. N. U. of L. T. I. of E. and E. E. (2018). Smart Power Meter for the IoT. 16th IEEE International Conference on Industrial Informatics, INDIN 2018, 514â€“519. https://doi.org/10.1109/INDIN.2018.8472018	Advanced Metering Infrastructure (AMI) today represents the backbone of Smart City intended as urban area where the most of public services are smart. Smart devices allow cities to be smart, enabling communication also among things and creating a new system nowadays known as IoT (Internet of Things). In particular the smarter the meters, the smarter the City, but the concept of smartness is not u…	.				X	Based on the abstract, Paper 74 describes an innovative solution for integrating electrical power, gas, and water metering into the same infrastructure. While the paper discusses the use of smart meters and wireless networks, it focuses solely on the measurement and management of electrical power, gas, and water, without any mention of water quality monitoring, wastewater management, water distri…	.
	344	A Master Attack Methodology for an AI-Based Automated Attack Planner for Smart Cities	Falco, G., Viswanathan, A., Caldera, C., & Shrobe, H. (2018). A Master Attack Methodology for an AI-Based Automated Attack Planner for Smart Cities. IEEE Access, 6, 48360â€“48373. https://doi.org/10.1109/ACCESS.2018.2867556	America's critical infrastructure is becoming 'smarter' and increasingly dependent on highly specialized computers called industrial control systems (ICS). Networked ICS components now called the industrial Internet of Things (IIoT) are at the heart of the 'smart city', controlling critical infrastructure, such as CCTV security networks, electric grids, water networks, and transportation systems.…	.				X	Explanation: This paper proposes a Master Attack Methodology for an AI-based Automated Attack Planner for Smart Cities. Although the paper does not directly discuss IoT-based water and wastewater infrastructures and networks management, it highlights the importance of securing critical infrastructure, including water networks, which fall under the category of IoT-Based Water Distribution Systems.…	.
	345	Internet of things water monitoring for a smart seaside city	Stoyanov, S., Orozova, D., & Popchev, I. (2018, June). Internet of things water monitoring for a smart seaside city. In 2018 20th International Symposium on Electrical Apparatus and Technologies (SIELA) (pp. 1-3). IEEE.	This paper presents a possible platform for Internet of Things monitoring of seawater that can enhance the infrastructure of a Smart Seaside City. Integration of virtual and physical worlds is a distinctive feature of close related Cyber-Physical Spaces, Cyber-Physical-Social Spaces, and Internet of Things. Building platforms that exploit this property would reveal new opportunities for accomplis…	.				X	xplanation: Paper 76 discusses the use of an IoT platform for monitoring seawater quality in a smart seaside city, which falls under the category of IoT-based water quality monitoring. The paper does not mention any direct use of IoT for wastewater management, water distribution systems, or water conservation, so it is not included in those categories. Finally, the paper is directly related to Io…	.
	346	Impact Driven Sensor Placement for Leak Detection in Community Water Networks	Venkateswaran, P., Han, Q., Eguchi, R. T., & Venkatasubramanian, N. (2018). Impact Driven Sensor Placement for Leak Detection in Community Water Networks. 9th ACM/IEEE International Conference on Cyber-Physical Systems, ICCPS 2018, 77â€“87. https://doi.org/10.1109/ICCPS.2018.00016	Community water networks have become increasingly prone to failures due to aging infrastructure, resulting in an increased effort to instrument and monitor networks using IoT (Internet of Things) sensors. However, identifying optimal locations to instrument these sensors to detect and localize failures such as leaks is challenging due to the growing scale and complexity of water networks. Current…	.				X	Paper 77 falls under the categories of IoT-based water quality monitoring and IoT-based water distribution systems. The paper proposes a multilevel approach that integrates IoT sensing data and simulation-based analytics to drive two novel sensor placement algorithms for identifying optimal locations to instrument sensors in community water networks to detect and localize failures such as leaks. …	.
[truncated: 151 more rows]

## Sheet: Table S4 | Water quality
	Table S4: Articles belong to IoT-based water quality monitoring as classified using ChatGPT with explanation
	IoT-based water quality monitoring
	No.	title	apa	Abstract	.	IoT-based water quality monitoring	IoT-based wastewater infrastructure management	IoT-based water infrastructure management	Not Related	Explanation	.
[truncated: 53 more rows]

## Sheet: Table S5 | Wastewater infra.
Table S5: Articles belong to IoT-based wastewater infrastructure management as classified using ChatGPT with explanation
IoT-based wastewater infrastructure management
											.
											.
	No.	title	apa	Abstract	.	IoT-based water quality monitoring	IoT-based wastewater infrastructure management	IoT-based water infrastructure management	Not Related	Explanation	.
[truncated: 32 more rows]

## Sheet: Table S6 | Water infra.
	Table S6: Articles belong to IoT-based water infrastructure management as classified using ChatGPT with explanation
[truncated: 78 more rows]

## Sheet: Table S7 | Experts responses
	Table S7 : Comparsion between answers form ChatGPT and human experts for the 14 questions related to the five subcategorizes for selected 30 articles
[truncated: 37 more rows]
[truncated: 5 more columns]

[truncated: 1 more sheets: Table S8 | Answers]
